# Supplementary material
Source: publisher figshare collection journal article supplement (https://acs.figshare.com/ndownloader/files/3944047)
Supplement: Supplementary file 1 [file 3944047]

data_Compound3aiPr
_publ_requested_journal          Organometallics
_publ_contact_author_name        'Jason M. Lynam'
_publ_contact_author_address     
'Department of Chemistry, University of York, Heslington, York, YO10 5DD, UK'
_publ_contact_author_email       jason.lynam@york.ac.uk
_publ_contact_author_phone       +44(0)1904322534
_publ_contact_author_fax         +44(0)1904322516
loop_
_publ_author_name
_publ_author_address
' Lynam, Jason M.'
'Department of Chemistry, University of York, Heslington, York, YO10 5DD, UK'
'Pickup, Oliver J. S.'
'Department of Chemistry, University of York, Heslington, York, YO10 5DD, UK'
'Khazal, Iman'
'Department of Chemistry, University of York, Heslington, York, YO10 5DD, UK'
'Smith, Elizabeth J.'
'Department of Chemistry, University of York, Heslington, York, YO10 5DD, UK'
'Whitwood, Adrian C.'
'Department of Chemistry, University of York, Heslington, York, YO10 5DD, UK'
'Bolaky, K.'
'School of Chemistry, University of Bristol, Cantocks Close, Bristol BS8 1TS, UK'
'King, Timothy C.'
'School of Chemistry, University of Bristol, Cantocks Close, Bristol BS8 1TS, UK'
'Rawe, Benjamin W.'
'School of Chemistry, University of Bristol, Cantocks Close, Bristol BS8 1TS, UK'
'Fey, Natalie'
'School of Chemistry, University of Bristol, Cantocks Close, Bristol BS8 1TS, UK'
_audit_creation_date              2011-07-19
_audit_creation_method
;
  Olex2 1.1
  (compiled 2011.02.15 svn.r1672, GUI svn.r3494)
;
_chemical_name_common             ?
_chemical_name_systematic         ?
_chemical_formula_moiety          'C22 H48 O4 P2 Ru'
_chemical_formula_sum             'C22 H48 O4 P2 Ru'
_chemical_formula_weight          539.61
_chemical_melting_point           ?
_chemical_oxdiff_formula          'C22H43B N6P Rh Si'
_chemical_oxdiff_usercomment      'Lizzie's ejs35'
loop_
  _atom_type_symbol
  _atom_type_description
  _atom_type_scat_dispersion_real
  _atom_type_scat_dispersion_imag
  _atom_type_scat_source
 'C' 'C' 0.0033 0.0016 'International Tables Vol C Tables 4.2.6.8 and 6.1.1.4'
 'H' 'H' 0.0000 0.0000 'International Tables Vol C Tables 4.2.6.8 and 6.1.1.4'
 'O' 'O' 0.0106 0.0060 'International Tables Vol C Tables 4.2.6.8 and 6.1.1.4'
 'P' 'P' 0.1023 0.0942 'International Tables Vol C Tables 4.2.6.8 and 6.1.1.4'
 'Ru' 'Ru' -1.2594 0.8363
 'International Tables Vol C Tables 4.2.6.8 and 6.1.1.4'

_space_group_crystal_system       'monoclinic'
_space_group_IT_number            14
_space_group_name_H-M_alt         'P 1 21/n 1'
_space_group_name_Hall            '-P 2yn'
loop_
  _space_group_symop_id
  _space_group_symop_operation_xyz
 1 'x, y, z'
 2 '-x+1/2, y+1/2, -z+1/2'
 3 '-x, -y, -z'
 4 'x-1/2, -y-1/2, z-1/2'

_cell_length_a                    10.81596(13)
_cell_length_b                    17.4581(3)
_cell_length_c                    14.16497(15)
_cell_angle_alpha                 90.00
_cell_angle_beta                  100.2053(10)
_cell_angle_gamma                 90.00
_cell_volume                      2632.40(6)
_cell_formula_units_Z             4
_cell_measurement_reflns_used     10003
_cell_measurement_temperature     109.7
_cell_measurement_theta_max       32.0517
_cell_measurement_theta_min       3.0095
_exptl_absorpt_coefficient_mu     0.740
_exptl_absorpt_correction_T_max   0.931
_exptl_absorpt_correction_T_min   0.870
_exptl_absorpt_correction_type    analytical
_exptl_absorpt_process_details
;
CrysAlisPro, Agilent Technologies,
Version 1.171.34.49 (release 20-01-2011 CrysAlis171 .NET)
(compiled Jan 20 2011,15:58:25)
Analytical numeric absorption correction using a multifaceted crystal
			model based on expressions derived by R.C. Clark & J.S. Reid.
(Clark, R. C. & Reid, J. S. (1995). Acta Cryst. A51, 887-897)
;
_exptl_crystal_colour             '? ? orange'
_exptl_crystal_colour_lustre      ?
_exptl_crystal_colour_modifier    ?
_exptl_crystal_colour_primary     orange
_exptl_crystal_density_diffrn     1.362
_exptl_crystal_density_meas       ?
_exptl_crystal_density_method     'not measured'
_exptl_crystal_description        ?
_exptl_crystal_F_000              1144
_exptl_crystal_recrystallization_method Pentane
_exptl_crystal_size_max           0.255
_exptl_crystal_size_mid           0.1935
_exptl_crystal_size_min           0.127
_exptl_special_details
;
 ? 
;
_diffrn_reflns_av_R_equivalents   0.0227
_diffrn_reflns_av_unetI/netI      0.0359
_diffrn_reflns_limit_h_max        16
_diffrn_reflns_limit_h_min        -15
_diffrn_reflns_limit_k_max        22
_diffrn_reflns_limit_k_min        -24
_diffrn_reflns_limit_l_max        15
_diffrn_reflns_limit_l_min        -21
_diffrn_reflns_number             16355
_diffrn_reflns_theta_full         30.01
_diffrn_reflns_theta_max          32.19
_diffrn_reflns_theta_min          3.02
_diffrn_ambient_temperature       109.7
_diffrn_detector_area_resol_mean  16.1450
_diffrn_measured_fraction_theta_full 0.9981
_diffrn_measured_fraction_theta_max 0.896
_diffrn_measurement_details
;
#__ type_ start__ end____ width___ exp.time_
  1 omega   31.00   97.00   1.0000   10.0000
omega____ theta____ kappa____ phi______ frames
    -       26.3892   37.0000  -90.0000 66

#__ type_ start__ end____ width___ exp.time_
  2 omega  -45.00   27.00   1.0000   10.0000
omega____ theta____ kappa____ phi______ frames
    -       26.3892  -37.0000   90.0000 72

#__ type_ start__ end____ width___ exp.time_
  3 omega   26.00   52.00   1.0000   10.0000
omega____ theta____ kappa____ phi______ frames
    -       26.3892  -77.0000 -180.0000 26

#__ type_ start__ end____ width___ exp.time_
  4 omega    3.00   52.00   1.0000   10.0000
omega____ theta____ kappa____ phi______ frames
    -       26.3892  -37.0000  120.0000 49

#__ type_ start__ end____ width___ exp.time_
  5 omega  -33.00    9.00   1.0000   10.0000
omega____ theta____ kappa____ phi______ frames
    -       26.3892  -77.0000   30.0000 42
;
_diffrn_measurement_device_type   'SuperNova, Single source at offset), Eos'
_diffrn_measurement_method        '\w scans'
_diffrn_orient_matrix_UB_11       -0.0343258000
_diffrn_orient_matrix_UB_12       -0.0309238000
_diffrn_orient_matrix_UB_13       0.0151201000
_diffrn_orient_matrix_UB_21       -0.0076493000
_diffrn_orient_matrix_UB_22       -0.0160387000
_diffrn_orient_matrix_UB_23       -0.0466050000
_diffrn_orient_matrix_UB_31       0.0564688000
_diffrn_orient_matrix_UB_32       -0.0208462000
_diffrn_orient_matrix_UB_33       0.0135424000
_diffrn_radiation_monochromator   mirror
_diffrn_radiation_type            'Mo K\a'
_diffrn_radiation_wavelength      0.7107
_diffrn_source                    'SuperNova (Mo) X-ray Source'
_diffrn_standards_decay_%         ?
_diffrn_standards_interval_count  ?
_diffrn_standards_interval_time   ?
_diffrn_standards_number          ?
_reflns_number_gt                 7360
_reflns_number_total              8322
_reflns_odcompleteness_completeness 99.81
_reflns_odcompleteness_iscentric  1
_reflns_odcompleteness_theta      30.01
_reflns_threshold_expression      >2sigma(I)
_computing_cell_refinement
;
CrysAlisPro, Agilent Technologies,
Version 1.171.34.49 (release 20-01-2011 CrysAlis171 .NET)
(compiled Jan 20 2011,15:58:25)
;
_computing_data_collection
;
CrysAlisPro, Agilent Technologies,
Version 1.171.34.49 (release 20-01-2011 CrysAlis171 .NET)
(compiled Jan 20 2011,15:58:25)
;
_computing_data_reduction
;
CrysAlisPro, Agilent Technologies,
Version 1.171.34.49 (release 20-01-2011 CrysAlis171 .NET)
(compiled Jan 20 2011,15:58:25)
;
_computing_molecular_graphics
;
O. V. Dolomanov, L. J. Bourhis, R. J. Gildea, J. A. K. Howard and H. Puschmann,
OLEX2: a complete structure solution, refinement and analysis program.
J. Appl. Cryst. (2009). 42, 339-341.
;
_computing_publication_material
;
O. V. Dolomanov, L. J. Bourhis, R. J. Gildea, J. A. K. Howard and H. Puschmann,
OLEX2: a complete structure solution, refinement and analysis program.
J. Appl. Cryst. (2009). 42, 339-341.
;
_computing_structure_refinement   'SHELXL-97 (Sheldrick, 1997)'
_computing_structure_solution
'A short history of SHELX (Sheldrick, 2007)/Bruker'
_refine_diff_density_max          0.498
_refine_diff_density_min          -0.470
_refine_diff_density_rms          0.073
_refine_ls_extinction_coef        ?
_refine_ls_extinction_method      none
_refine_ls_goodness_of_fit_ref    1.049
_refine_ls_hydrogen_treatment     constr
_refine_ls_matrix_type            full
_refine_ls_number_parameters      276
_refine_ls_number_reflns          8322
_refine_ls_number_restraints      0
_refine_ls_R_factor_all           0.0319
_refine_ls_R_factor_gt            0.0262
_refine_ls_restrained_S_all       1.049
_refine_ls_shift/su_max           0.003
_refine_ls_shift/su_mean          0.000
_refine_ls_structure_factor_coef  Fsqd
_refine_ls_weighting_details
'calc w=1/[\s^2^(Fo^2^)+(0.0210P)^2^+0.8788P] where P=(Fo^2^+2Fc^2^)/3'
_refine_ls_weighting_scheme       calc
_refine_ls_wR_factor_gt           0.0580
_refine_ls_wR_factor_ref          0.0615
_refine_special_details
;
 Refinement of F^2^ against ALL reflections.  The weighted R-factor wR and 
 goodness of fit S are based on F^2^, conventional R-factors R are based 
 on F, with F set to zero for negative F^2^. The threshold expression of 
 F^2^ > 2sigma(F^2^) is used only for calculating R-factors(gt) etc. and is 
 not relevant to the choice of reflections for refinement.  R-factors based 
 on F^2^ are statistically about twice as large as those based on F, and R- 
 factors based on ALL data will be even larger. 
;
_atom_sites_solution_hydrogens    geom
_atom_sites_solution_primary      direct
_atom_sites_solution_secondary    difmap
loop_
  _atom_site_label
  _atom_site_type_symbol
  _atom_site_fract_x
  _atom_site_fract_y
  _atom_site_fract_z
  _atom_site_U_iso_or_equiv
  _atom_site_adp_type
  _atom_site_occupancy
  _atom_site_symmetry_multiplicity
  _atom_site_calc_flag
  _atom_site_refinement_flags
  _atom_site_disorder_assembly
  _atom_site_disorder_group
 C1 C 0.78060(13) 0.37705(8) 0.95605(10) 0.0154(3) Uani 1 1 d . . .
 C2 C 0.87632(15) 0.40801(9) 1.03664(12) 0.0226(3) Uani 1 1 d . . .
 H2A H 0.8934 0.4618 1.0240 0.034 Uiso 1 1 calc R . .
 H2B H 0.9541 0.3783 1.0417 0.034 Uiso 1 1 calc R . .
 H2C H 0.8440 0.4041 1.0969 0.034 Uiso 1 1 calc R . .
 C3 C 0.55367(13) 0.19276(8) 0.87574(11) 0.0155(3) Uani 1 1 d . . .
 C4 C 0.53727(16) 0.11126(9) 0.90435(13) 0.0240(3) Uani 1 1 d . . .
 H4A H 0.5041 0.0809 0.8472 0.036 Uiso 1 1 calc R . .
 H4B H 0.4783 0.1092 0.9495 0.036 Uiso 1 1 calc R . .
 H4C H 0.6186 0.0904 0.9350 0.036 Uiso 1 1 calc R . .
 C5 C 0.76116(15) 0.46939(9) 0.70230(12) 0.0213(3) Uani 1 1 d . . .
 H5 H 0.8062 0.4713 0.6465 0.026 Uiso 1 1 calc R . .
 C6 C 0.65672(18) 0.52906(10) 0.68311(17) 0.0360(4) Uani 1 1 d . . .
 H6A H 0.5921 0.5119 0.6298 0.054 Uiso 1 1 calc R . .
 H6B H 0.6917 0.5780 0.6664 0.054 Uiso 1 1 calc R . .
 H6C H 0.6193 0.5356 0.7407 0.054 Uiso 1 1 calc R . .
 C7 C 0.85584(19) 0.49358(11) 0.79030(13) 0.0329(4) Uani 1 1 d . . .
 H7A H 0.8144 0.4950 0.8465 0.049 Uiso 1 1 calc R . .
 H7B H 0.8887 0.5445 0.7795 0.049 Uiso 1 1 calc R . .
 H7C H 0.9252 0.4567 0.8014 0.049 Uiso 1 1 calc R . .
 C8 C 0.85142(14) 0.31562(9) 0.71507(11) 0.0185(3) Uani 1 1 d . . .
 H8 H 0.9073 0.3367 0.7731 0.022 Uiso 1 1 calc R . .
 C9 C 0.84318(15) 0.22955(9) 0.73460(13) 0.0240(3) Uani 1 1 d . . .
 H9A H 0.7996 0.2215 0.7888 0.036 Uiso 1 1 calc R . .
 H9B H 0.9281 0.2080 0.7499 0.036 Uiso 1 1 calc R . .
 H9C H 0.7966 0.2041 0.6775 0.036 Uiso 1 1 calc R . .
 C10 C 0.92369(15) 0.32824(10) 0.63251(13) 0.0253(3) Uani 1 1 d . . .
 H10A H 0.8754 0.3070 0.5732 0.038 Uiso 1 1 calc R . .
 H10B H 1.0054 0.3025 0.6473 0.038 Uiso 1 1 calc R . .
 H10C H 0.9365 0.3832 0.6243 0.038 Uiso 1 1 calc R . .
 C11 C 0.61169(14) 0.35643(9) 0.58275(11) 0.0202(3) Uani 1 1 d . . .
 H11 H 0.5242 0.3744 0.5840 0.024 Uiso 1 1 calc R . .
 C12 C 0.60041(16) 0.27080(10) 0.55748(12) 0.0258(3) Uani 1 1 d . . .
 H12A H 0.6797 0.2526 0.5411 0.039 Uiso 1 1 calc R . .
 H12B H 0.5325 0.2632 0.5025 0.039 Uiso 1 1 calc R . .
 H12C H 0.5819 0.2419 0.6127 0.039 Uiso 1 1 calc R . .
 C13 C 0.65448(18) 0.39987(12) 0.49998(12) 0.0321(4) Uani 1 1 d . . .
 H13A H 0.6546 0.4550 0.5129 0.048 Uiso 1 1 calc R . .
 H13B H 0.5967 0.3889 0.4400 0.048 Uiso 1 1 calc R . .
 H13C H 0.7394 0.3834 0.4942 0.048 Uiso 1 1 calc R . .
 C14 C 0.33116(14) 0.35494(9) 0.90278(11) 0.0177(3) Uani 1 1 d . . .
 H14 H 0.3325 0.2992 0.9190 0.021 Uiso 1 1 calc R . .
 C15 C 0.40821(15) 0.39354(9) 0.99093(11) 0.0223(3) Uani 1 1 d . . .
 H15A H 0.4974 0.3816 0.9941 0.033 Uiso 1 1 calc R . .
 H15B H 0.3806 0.3746 1.0489 0.033 Uiso 1 1 calc R . .
 H15C H 0.3960 0.4491 0.9862 0.033 Uiso 1 1 calc R . .
 C16 C 0.19298(15) 0.37870(10) 0.89339(13) 0.0243(3) Uani 1 1 d . . .
 H16A H 0.1846 0.4334 0.8782 0.036 Uiso 1 1 calc R . .
 H16B H 0.1641 0.3688 0.9540 0.036 Uiso 1 1 calc R . .
 H16C H 0.1420 0.3491 0.8419 0.036 Uiso 1 1 calc R . .
 C17 C 0.36840(14) 0.45913(8) 0.74041(11) 0.0180(3) Uani 1 1 d . . .
 H17 H 0.4217 0.4642 0.6898 0.022 Uiso 1 1 calc R . .
 C18 C 0.41774(16) 0.51960(9) 0.81597(12) 0.0232(3) Uani 1 1 d . . .
 H18A H 0.3595 0.5244 0.8614 0.035 Uiso 1 1 calc R . .
 H18B H 0.4247 0.5690 0.7844 0.035 Uiso 1 1 calc R . .
 H18C H 0.5006 0.5041 0.8505 0.035 Uiso 1 1 calc R . .
 C19 C 0.23503(15) 0.48027(10) 0.69101(13) 0.0282(4) Uani 1 1 d . . .
 H19A H 0.2066 0.4440 0.6388 0.042 Uiso 1 1 calc R . .
 H19B H 0.2349 0.5322 0.6649 0.042 Uiso 1 1 calc R . .
 H19C H 0.1783 0.4780 0.7377 0.042 Uiso 1 1 calc R . .
 C20 C 0.28045(14) 0.30377(10) 0.70966(12) 0.0221(3) Uani 1 1 d . . .
 H20 H 0.1985 0.3310 0.7069 0.027 Uiso 1 1 calc R . .
 C21 C 0.30529(17) 0.30128(13) 0.60731(13) 0.0342(4) Uani 1 1 d . . .
 H21A H 0.3188 0.3534 0.5856 0.051 Uiso 1 1 calc R . .
 H21B H 0.2328 0.2786 0.5653 0.051 Uiso 1 1 calc R . .
 H21C H 0.3802 0.2702 0.6051 0.051 Uiso 1 1 calc R . .
 C22 C 0.26102(17) 0.22239(10) 0.74431(15) 0.0322(4) Uani 1 1 d . . .
 H22A H 0.3385 0.1928 0.7463 0.048 Uiso 1 1 calc R . .
 H22B H 0.1925 0.1978 0.7001 0.048 Uiso 1 1 calc R . .
 H22C H 0.2396 0.2244 0.8087 0.048 Uiso 1 1 calc R . .
 O1 O 0.68107(9) 0.41536(6) 0.92532(7) 0.0156(2) Uani 1 1 d . . .
 O2 O 0.79653(9) 0.31380(6) 0.91716(8) 0.0159(2) Uani 1 1 d . . .
 O3 O 0.56933(10) 0.20891(6) 0.79116(7) 0.0164(2) Uani 1 1 d . . .
 O4 O 0.55293(10) 0.24623(6) 0.93553(7) 0.0163(2) Uani 1 1 d . . .
 P1 P 0.70009(3) 0.36955(2) 0.70721(3) 0.01381(7) Uani 1 1 d . . .
 P2 P 0.39982(3) 0.36103(2) 0.79082(3) 0.01366(7) Uani 1 1 d . . .
 Ru1 Ru 0.606462(10) 0.326136(6) 0.829943(8) 0.01141(3) Uani 1 1 d . . .

loop_
  _atom_site_aniso_label
  _atom_site_aniso_U_11
  _atom_site_aniso_U_22
  _atom_site_aniso_U_33
  _atom_site_aniso_U_23
  _atom_site_aniso_U_13
  _atom_site_aniso_U_12
 C1 0.0134(6) 0.0172(6) 0.0151(6) -0.0001(5) 0.0012(5) -0.0013(5)
 C2 0.0180(7) 0.0241(8) 0.0228(8) -0.0049(6) -0.0041(6) 0.0000(6)
 C3 0.0122(6) 0.0142(6) 0.0207(7) -0.0003(5) 0.0040(5) 0.0002(5)
 C4 0.0290(8) 0.0160(7) 0.0290(8) 0.0009(6) 0.0106(7) -0.0015(6)
 C5 0.0219(7) 0.0179(7) 0.0259(8) 0.0004(6) 0.0092(6) -0.0046(6)
 C6 0.0329(9) 0.0171(8) 0.0621(14) 0.0043(8) 0.0196(9) 0.0002(7)
 C7 0.0404(10) 0.0283(9) 0.0299(9) -0.0028(7) 0.0062(8) -0.0192(8)
 C8 0.0136(6) 0.0230(7) 0.0197(7) 0.0004(6) 0.0054(5) 0.0014(6)
 C9 0.0222(7) 0.0226(8) 0.0293(8) 0.0025(7) 0.0098(6) 0.0078(6)
 C10 0.0176(7) 0.0337(9) 0.0267(8) 0.0010(7) 0.0093(6) 0.0000(6)
 C11 0.0182(7) 0.0258(8) 0.0162(7) 0.0003(6) 0.0022(6) 0.0000(6)
 C12 0.0228(7) 0.0306(9) 0.0237(8) -0.0099(7) 0.0034(6) -0.0017(7)
 C13 0.0306(9) 0.0471(11) 0.0182(8) 0.0085(8) 0.0034(7) -0.0007(8)
 C14 0.0164(6) 0.0166(7) 0.0213(7) 0.0000(6) 0.0065(6) 0.0000(5)
 C15 0.0256(8) 0.0243(8) 0.0188(7) -0.0030(6) 0.0087(6) -0.0003(6)
 C16 0.0181(7) 0.0253(8) 0.0319(9) 0.0007(7) 0.0113(6) 0.0027(6)
 C17 0.0157(6) 0.0195(7) 0.0185(7) 0.0031(6) 0.0021(5) 0.0038(5)
 C18 0.0276(8) 0.0164(7) 0.0262(8) -0.0008(6) 0.0061(7) 0.0043(6)
 C19 0.0198(7) 0.0324(9) 0.0315(9) 0.0116(7) 0.0023(7) 0.0081(7)
 C20 0.0123(6) 0.0260(8) 0.0263(8) -0.0092(6) -0.0015(6) -0.0003(6)
 C21 0.0212(8) 0.0519(12) 0.0276(9) -0.0194(9) -0.0012(7) -0.0051(8)
 C22 0.0230(8) 0.0227(8) 0.0482(11) -0.0118(8) -0.0014(8) -0.0053(7)
 O1 0.0143(4) 0.0145(5) 0.0174(5) -0.0018(4) 0.0010(4) 0.0010(4)
 O2 0.0143(4) 0.0161(5) 0.0165(5) -0.0010(4) 0.0007(4) 0.0021(4)
 O3 0.0178(5) 0.0149(5) 0.0173(5) -0.0021(4) 0.0051(4) -0.0007(4)
 O4 0.0178(5) 0.0153(5) 0.0159(5) 0.0001(4) 0.0038(4) 0.0014(4)
 P1 0.01272(15) 0.01386(16) 0.01509(17) -0.00023(13) 0.00316(13) -0.00057(13)
 P2 0.01098(15) 0.01433(17) 0.01526(17) -0.00274(13) 0.00118(13) 0.00020(13)
 Ru1 0.01036(5) 0.01140(6) 0.01227(6) -0.00075(4) 0.00150(4) 0.00043(4)

_geom_special_details
;
 All esds (except the esd in the dihedral angle between two l.s. planes) 
 are estimated using the full covariance matrix.  The cell esds are taken 
 into account individually in the estimation of esds in distances, angles 
 and torsion angles; correlations between esds in cell parameters are only 
 used when they are defined by crystal symmetry.  An approximate (isotropic) 
 treatment of cell esds is used for estimating esds involving l.s. planes. 
;
loop_
  _geom_bond_atom_site_label_1
  _geom_bond_atom_site_label_2
  _geom_bond_distance
  _geom_bond_site_symmetry_2
  _geom_bond_publ_flag
 C1 C2 1.499(2) . ?
 C1 O1 1.2765(17) . ?
 C1 O2 1.2595(17) . ?
 C1 Ru1 2.5172(14) . ?
 C2 H2A 0.9800 . ?
 C2 H2B 0.9800 . ?
 C2 H2C 0.9800 . ?
 C3 C4 1.499(2) . ?
 C3 O3 1.2710(18) . ?
 C3 O4 1.2614(18) . ?
 C3 Ru1 2.5099(15) . ?
 C4 H4A 0.9800 . ?
 C4 H4B 0.9800 . ?
 C4 H4C 0.9800 . ?
 C5 H5 1.0000 . ?
 C5 C6 1.525(2) . ?
 C5 C7 1.526(2) . ?
 C5 P1 1.8695(15) . ?
 C6 H6A 0.9800 . ?
 C6 H6B 0.9800 . ?
 C6 H6C 0.9800 . ?
 C7 H7A 0.9800 . ?
 C7 H7B 0.9800 . ?
 C7 H7C 0.9800 . ?
 C8 H8 1.0000 . ?
 C8 C9 1.533(2) . ?
 C8 C10 1.533(2) . ?
 C8 P1 1.8744(15) . ?
 C9 H9A 0.9800 . ?
 C9 H9B 0.9800 . ?
 C9 H9C 0.9800 . ?
 C10 H10A 0.9800 . ?
 C10 H10B 0.9800 . ?
 C10 H10C 0.9800 . ?
 C11 H11 1.0000 . ?
 C11 C12 1.537(2) . ?
 C11 C13 1.535(2) . ?
 C11 P1 1.8649(15) . ?
 C12 H12A 0.9800 . ?
 C12 H12B 0.9800 . ?
 C12 H12C 0.9800 . ?
 C13 H13A 0.9800 . ?
 C13 H13B 0.9800 . ?
 C13 H13C 0.9800 . ?
 C14 H14 1.0000 . ?
 C14 C15 1.529(2) . ?
 C14 C16 1.534(2) . ?
 C14 P2 1.8696(16) . ?
 C15 H15A 0.9800 . ?
 C15 H15B 0.9800 . ?
 C15 H15C 0.9800 . ?
 C16 H16A 0.9800 . ?
 C16 H16B 0.9800 . ?
 C16 H16C 0.9800 . ?
 C17 H17 1.0000 . ?
 C17 C18 1.530(2) . ?
 C17 C19 1.533(2) . ?
 C17 P2 1.8635(15) . ?
 C18 H18A 0.9800 . ?
 C18 H18B 0.9800 . ?
 C18 H18C 0.9800 . ?
 C19 H19A 0.9800 . ?
 C19 H19B 0.9800 . ?
 C19 H19C 0.9800 . ?
 C20 H20 1.0000 . ?
 C20 C21 1.521(2) . ?
 C20 C22 1.530(2) . ?
 C20 P2 1.8607(15) . ?
 C21 H21A 0.9800 . ?
 C21 H21B 0.9800 . ?
 C21 H21C 0.9800 . ?
 C22 H22A 0.9800 . ?
 C22 H22B 0.9800 . ?
 C22 H22C 0.9800 . ?
 O1 Ru1 2.1252(10) . ?
 O2 Ru1 2.2134(10) . ?
 O3 Ru1 2.1385(10) . ?
 O4 Ru1 2.1966(10) . ?
 P1 Ru1 2.2904(4) . ?
 P2 Ru1 2.2879(4) . ?

loop_
  _geom_angle_atom_site_label_1
  _geom_angle_atom_site_label_2
  _geom_angle_atom_site_label_3
  _geom_angle
  _geom_angle_site_symmetry_1
  _geom_angle_site_symmetry_3
  _geom_angle_publ_flag
 C2 C1 Ru1 175.17(11) . . ?
 O1 C1 C2 119.84(13) . . ?
 O1 C1 Ru1 57.54(7) . . ?
 O2 C1 C2 121.29(13) . . ?
 O2 C1 O1 118.86(13) . . ?
 O2 C1 Ru1 61.52(7) . . ?
 C1 C2 H2A 109.5 . . ?
 C1 C2 H2B 109.5 . . ?
 C1 C2 H2C 109.5 . . ?
 H2A C2 H2B 109.5 . . ?
 H2A C2 H2C 109.5 . . ?
 H2B C2 H2C 109.5 . . ?
 C4 C3 Ru1 173.71(11) . . ?
 O3 C3 C4 120.49(14) . . ?
 O3 C3 Ru1 58.41(7) . . ?
 O4 C3 C4 120.39(14) . . ?
 O4 C3 O3 119.12(13) . . ?
 O4 C3 Ru1 61.04(7) . . ?
 C3 C4 H4A 109.5 . . ?
 C3 C4 H4B 109.5 . . ?
 C3 C4 H4C 109.5 . . ?
 H4A C4 H4B 109.5 . . ?
 H4A C4 H4C 109.5 . . ?
 H4B C4 H4C 109.5 . . ?
 C6 C5 H5 106.6 . . ?
 C6 C5 C7 108.98(15) . . ?
 C6 C5 P1 112.83(11) . . ?
 C7 C5 H5 106.6 . . ?
 C7 C5 P1 114.71(11) . . ?
 P1 C5 H5 106.6 . . ?
 C5 C6 H6A 109.5 . . ?
 C5 C6 H6B 109.5 . . ?
 C5 C6 H6C 109.5 . . ?
 H6A C6 H6B 109.5 . . ?
 H6A C6 H6C 109.5 . . ?
 H6B C6 H6C 109.5 . . ?
 C5 C7 H7A 109.5 . . ?
 C5 C7 H7B 109.5 . . ?
 C5 C7 H7C 109.5 . . ?
 H7A C7 H7B 109.5 . . ?
 H7A C7 H7C 109.5 . . ?
 H7B C7 H7C 109.5 . . ?
 C9 C8 H8 105.0 . . ?
 C9 C8 C10 109.40(13) . . ?
 C9 C8 P1 115.15(11) . . ?
 C10 C8 H8 105.0 . . ?
 C10 C8 P1 116.13(11) . . ?
 P1 C8 H8 105.0 . . ?
 C8 C9 H9A 109.5 . . ?
 C8 C9 H9B 109.5 . . ?
 C8 C9 H9C 109.5 . . ?
 H9A C9 H9B 109.5 . . ?
 H9A C9 H9C 109.5 . . ?
 H9B C9 H9C 109.5 . . ?
 C8 C10 H10A 109.5 . . ?
 C8 C10 H10B 109.5 . . ?
 C8 C10 H10C 109.5 . . ?
 H10A C10 H10B 109.5 . . ?
 H10A C10 H10C 109.5 . . ?
 H10B C10 H10C 109.5 . . ?
 C12 C11 H11 105.8 . . ?
 C12 C11 P1 110.23(11) . . ?
 C13 C11 H11 105.8 . . ?
 C13 C11 C12 108.96(14) . . ?
 C13 C11 P1 119.21(12) . . ?
 P1 C11 H11 105.8 . . ?
 C11 C12 H12A 109.5 . . ?
 C11 C12 H12B 109.5 . . ?
 C11 C12 H12C 109.5 . . ?
 H12A C12 H12B 109.5 . . ?
 H12A C12 H12C 109.5 . . ?
 H12B C12 H12C 109.5 . . ?
 C11 C13 H13A 109.5 . . ?
 C11 C13 H13B 109.5 . . ?
 C11 C13 H13C 109.5 . . ?
 H13A C13 H13B 109.5 . . ?
 H13A C13 H13C 109.5 . . ?
 H13B C13 H13C 109.5 . . ?
 C15 C14 H14 105.0 . . ?
 C15 C14 C16 109.46(13) . . ?
 C15 C14 P2 115.25(10) . . ?
 C16 C14 H14 105.0 . . ?
 C16 C14 P2 116.00(11) . . ?
 P2 C14 H14 105.0 . . ?
 C14 C15 H15A 109.5 . . ?
 C14 C15 H15B 109.5 . . ?
 C14 C15 H15C 109.5 . . ?
 H15A C15 H15B 109.5 . . ?
 H15A C15 H15C 109.5 . . ?
 H15B C15 H15C 109.5 . . ?
 C14 C16 H16A 109.5 . . ?
 C14 C16 H16B 109.5 . . ?
 C14 C16 H16C 109.5 . . ?
 H16A C16 H16B 109.5 . . ?
 H16A C16 H16C 109.5 . . ?
 H16B C16 H16C 109.5 . . ?
 C18 C17 H17 105.5 . . ?
 C18 C17 C19 109.67(13) . . ?
 C18 C17 P2 110.40(10) . . ?
 C19 C17 H17 105.5 . . ?
 C19 C17 P2 119.29(11) . . ?
 P2 C17 H17 105.5 . . ?
 C17 C18 H18A 109.5 . . ?
 C17 C18 H18B 109.5 . . ?
 C17 C18 H18C 109.5 . . ?
 H18A C18 H18B 109.5 . . ?
 H18A C18 H18C 109.5 . . ?
 H18B C18 H18C 109.5 . . ?
 C17 C19 H19A 109.5 . . ?
 C17 C19 H19B 109.5 . . ?
 C17 C19 H19C 109.5 . . ?
 H19A C19 H19B 109.5 . . ?
 H19A C19 H19C 109.5 . . ?
 H19B C19 H19C 109.5 . . ?
 C21 C20 H20 106.4 . . ?
 C21 C20 C22 109.68(15) . . ?
 C21 C20 P2 112.57(12) . . ?
 C22 C20 H20 106.4 . . ?
 C22 C20 P2 114.86(12) . . ?
 P2 C20 H20 106.4 . . ?
 C20 C21 H21A 109.5 . . ?
 C20 C21 H21B 109.5 . . ?
 C20 C21 H21C 109.5 . . ?
 H21A C21 H21B 109.5 . . ?
 H21A C21 H21C 109.5 . . ?
 H21B C21 H21C 109.5 . . ?
 C20 C22 H22A 109.5 . . ?
 C20 C22 H22B 109.5 . . ?
 C20 C22 H22C 109.5 . . ?
 H22A C22 H22B 109.5 . . ?
 H22A C22 H22C 109.5 . . ?
 H22B C22 H22C 109.5 . . ?
 C1 O1 Ru1 92.01(8) . . ?
 C1 O2 Ru1 88.47(8) . . ?
 C3 O3 Ru1 91.17(9) . . ?
 C3 O4 Ru1 88.79(9) . . ?
 C5 P1 C8 99.21(7) . . ?
 C5 P1 Ru1 122.91(5) . . ?
 C8 P1 Ru1 106.71(5) . . ?
 C11 P1 C5 101.81(7) . . ?
 C11 P1 C8 106.89(7) . . ?
 C11 P1 Ru1 117.09(5) . . ?
 C14 P2 Ru1 107.29(5) . . ?
 C17 P2 C14 107.73(7) . . ?
 C17 P2 Ru1 116.20(5) . . ?
 C20 P2 C14 99.04(7) . . ?
 C20 P2 C17 101.39(7) . . ?
 C20 P2 Ru1 123.21(5) . . ?
 C3 Ru1 C1 108.67(5) . . ?
 O1 Ru1 C1 30.45(4) . . ?
 O1 Ru1 C3 126.43(4) . . ?
 O1 Ru1 O2 60.39(4) . . ?
 O1 Ru1 O3 153.85(4) . . ?
 O1 Ru1 O4 98.56(4) . . ?
 O1 Ru1 P1 94.06(3) . . ?
 O1 Ru1 P2 101.74(3) . . ?
 O2 Ru1 C1 30.01(4) . . ?
 O2 Ru1 C3 89.82(4) . . ?
 O2 Ru1 P1 87.94(3) . . ?
 O2 Ru1 P2 158.74(3) . . ?
 O3 Ru1 C1 127.09(4) . . ?
 O3 Ru1 C3 30.42(4) . . ?
 O3 Ru1 O2 99.43(4) . . ?
 O3 Ru1 O4 60.46(4) . . ?
 O3 Ru1 P1 102.11(3) . . ?
 O3 Ru1 P2 93.53(3) . . ?
 O4 Ru1 C1 89.74(4) . . ?
 O4 Ru1 C3 30.16(4) . . ?
 O4 Ru1 O2 83.62(4) . . ?
 O4 Ru1 P1 158.79(3) . . ?
 O4 Ru1 P2 88.28(3) . . ?
 P1 Ru1 C1 92.63(4) . . ?
 P1 Ru1 C3 130.89(4) . . ?
 P2 Ru1 C1 130.83(4) . . ?
 P2 Ru1 C3 93.01(3) . . ?
 P2 Ru1 P1 105.803(14) . . ?

loop_
  _geom_torsion_atom_site_label_1
  _geom_torsion_atom_site_label_2
  _geom_torsion_atom_site_label_3
  _geom_torsion_atom_site_label_4
  _geom_torsion
  _geom_torsion_site_symmetry_1
  _geom_torsion_site_symmetry_2
  _geom_torsion_site_symmetry_3
  _geom_torsion_site_symmetry_4
  _geom_torsion_publ_flag
 C1 O1 Ru1 C3 61.94(10) . . . . ?
 C1 O1 Ru1 O2 -2.98(8) . . . . ?
 C1 O1 Ru1 O3 40.17(14) . . . . ?
 C1 O1 Ru1 O4 74.62(9) . . . . ?
 C1 O1 Ru1 P1 -88.28(8) . . . . ?
 C1 O1 Ru1 P2 164.64(8) . . . . ?
 C1 O2 Ru1 C3 -130.20(9) . . . . ?
 C1 O2 Ru1 O1 3.02(8) . . . . ?
 C1 O2 Ru1 O3 -159.19(8) . . . . ?
 C1 O2 Ru1 O4 -100.62(9) . . . . ?
 C1 O2 Ru1 P1 98.87(8) . . . . ?
 C1 O2 Ru1 P2 -32.36(13) . . . . ?
 C2 C1 O1 Ru1 -175.25(13) . . . . ?
 C2 C1 O2 Ru1 175.47(13) . . . . ?
 C3 O3 Ru1 C1 60.31(10) . . . . ?
 C3 O3 Ru1 O1 36.11(13) . . . . ?
 C3 O3 Ru1 O2 73.18(8) . . . . ?
 C3 O3 Ru1 O4 -3.90(8) . . . . ?
 C3 O3 Ru1 P1 163.09(8) . . . . ?
 C3 O3 Ru1 P2 -89.92(8) . . . . ?
 C3 O4 Ru1 C1 -130.16(8) . . . . ?
 C3 O4 Ru1 O1 -159.41(8) . . . . ?
 C3 O4 Ru1 O2 -100.71(8) . . . . ?
 C3 O4 Ru1 O3 3.93(8) . . . . ?
 C3 O4 Ru1 P1 -33.55(13) . . . . ?
 C3 O4 Ru1 P2 98.97(8) . . . . ?
 C4 C3 O3 Ru1 -172.76(12) . . . . ?
 C4 C3 O4 Ru1 172.94(13) . . . . ?
 C5 P1 Ru1 C1 -48.77(7) . . . . ?
 C5 P1 Ru1 C3 -166.40(7) . . . . ?
 C5 P1 Ru1 O1 -18.30(7) . . . . ?
 C5 P1 Ru1 O2 -78.43(7) . . . . ?
 C5 P1 Ru1 O3 -177.63(7) . . . . ?
 C5 P1 Ru1 O4 -144.85(9) . . . . ?
 C5 P1 Ru1 P2 85.11(6) . . . . ?
 C6 C5 P1 C8 172.97(13) . . . . ?
 C6 C5 P1 C11 63.43(14) . . . . ?
 C6 C5 P1 Ru1 -70.16(14) . . . . ?
 C7 C5 P1 C8 -61.43(14) . . . . ?
 C7 C5 P1 C11 -170.97(13) . . . . ?
 C7 C5 P1 Ru1 55.44(14) . . . . ?
 C8 P1 Ru1 C1 64.39(6) . . . . ?
 C8 P1 Ru1 C3 -53.24(7) . . . . ?
 C8 P1 Ru1 O1 94.86(6) . . . . ?
 C8 P1 Ru1 O2 34.73(6) . . . . ?
 C8 P1 Ru1 O3 -64.47(6) . . . . ?
 C8 P1 Ru1 O4 -31.69(10) . . . . ?
 C8 P1 Ru1 P2 -161.73(5) . . . . ?
 C9 C8 P1 C5 171.85(12) . . . . ?
 C9 C8 P1 C11 -82.73(13) . . . . ?
 C9 C8 P1 Ru1 43.29(12) . . . . ?
 C10 C8 P1 C5 -58.43(13) . . . . ?
 C10 C8 P1 C11 46.99(14) . . . . ?
 C10 C8 P1 Ru1 173.00(11) . . . . ?
 C11 P1 Ru1 C1 -176.00(7) . . . . ?
 C11 P1 Ru1 C3 66.38(7) . . . . ?
 C11 P1 Ru1 O1 -145.53(6) . . . . ?
 C11 P1 Ru1 O2 154.35(6) . . . . ?
 C11 P1 Ru1 O3 55.14(7) . . . . ?
 C11 P1 Ru1 O4 87.93(10) . . . . ?
 C11 P1 Ru1 P2 -42.11(6) . . . . ?
 C12 C11 P1 C5 156.35(11) . . . . ?
 C12 C11 P1 C8 52.80(12) . . . . ?
 C12 C11 P1 Ru1 -66.72(12) . . . . ?
 C13 C11 P1 C5 29.28(15) . . . . ?
 C13 C11 P1 C8 -74.27(15) . . . . ?
 C13 C11 P1 Ru1 166.21(12) . . . . ?
 C14 P2 Ru1 C1 -54.80(7) . . . . ?
 C14 P2 Ru1 C3 63.17(6) . . . . ?
 C14 P2 Ru1 O1 -65.02(6) . . . . ?
 C14 P2 Ru1 O2 -34.08(10) . . . . ?
 C14 P2 Ru1 O3 93.63(6) . . . . ?
 C14 P2 Ru1 O4 33.37(6) . . . . ?
 C14 P2 Ru1 P1 -162.72(5) . . . . ?
 C15 C14 P2 C17 -77.53(12) . . . . ?
 C15 C14 P2 C20 177.35(12) . . . . ?
 C15 C14 P2 Ru1 48.27(12) . . . . ?
 C16 C14 P2 C17 52.26(13) . . . . ?
 C16 C14 P2 C20 -52.86(13) . . . . ?
 C16 C14 P2 Ru1 178.06(10) . . . . ?
 C17 P2 Ru1 C1 65.77(7) . . . . ?
 C17 P2 Ru1 C3 -176.26(7) . . . . ?
 C17 P2 Ru1 O1 55.55(6) . . . . ?
 C17 P2 Ru1 O2 86.49(10) . . . . ?
 C17 P2 Ru1 O3 -145.80(6) . . . . ?
 C17 P2 Ru1 O4 153.94(6) . . . . ?
 C17 P2 Ru1 P1 -42.15(6) . . . . ?
 C18 C17 P2 C14 54.50(12) . . . . ?
 C18 C17 P2 C20 157.96(11) . . . . ?
 C18 C17 P2 Ru1 -65.83(12) . . . . ?
 C19 C17 P2 C14 -73.84(14) . . . . ?
 C19 C17 P2 C20 29.61(15) . . . . ?
 C19 C17 P2 Ru1 165.82(11) . . . . ?
 C20 P2 Ru1 C1 -168.40(8) . . . . ?
 C20 P2 Ru1 C3 -50.44(8) . . . . ?
 C20 P2 Ru1 O1 -178.62(8) . . . . ?
 C20 P2 Ru1 O2 -147.68(10) . . . . ?
 C20 P2 Ru1 O3 -19.97(8) . . . . ?
 C20 P2 Ru1 O4 -80.24(7) . . . . ?
 C20 P2 Ru1 P1 83.68(7) . . . . ?
 C21 C20 P2 C14 176.58(13) . . . . ?
 C21 C20 P2 C17 66.31(14) . . . . ?
 C21 C20 P2 Ru1 -65.78(14) . . . . ?
 C22 C20 P2 C14 -56.93(14) . . . . ?
 C22 C20 P2 C17 -167.21(13) . . . . ?
 C22 C20 P2 Ru1 60.70(15) . . . . ?
 O1 C1 O2 Ru1 -4.99(13) . . . . ?
 O1 C1 Ru1 C3 -131.46(8) . . . . ?
 O1 C1 Ru1 O2 174.82(14) . . . . ?
 O1 C1 Ru1 O3 -159.12(8) . . . . ?
 O1 C1 Ru1 O4 -107.55(8) . . . . ?
 O1 C1 Ru1 P1 93.54(8) . . . . ?
 O1 C1 Ru1 P2 -20.04(10) . . . . ?
 O2 C1 O1 Ru1 5.20(14) . . . . ?
 O2 C1 Ru1 C3 53.73(9) . . . . ?
 O2 C1 Ru1 O1 -174.82(14) . . . . ?
 O2 C1 Ru1 O3 26.07(11) . . . . ?
 O2 C1 Ru1 O4 77.64(9) . . . . ?
 O2 C1 Ru1 P1 -81.28(8) . . . . ?
 O2 C1 Ru1 P2 165.14(7) . . . . ?
 O3 C3 O4 Ru1 -6.60(13) . . . . ?
 O3 C3 Ru1 C1 -133.00(8) . . . . ?
 O3 C3 Ru1 O1 -161.16(7) . . . . ?
 O3 C3 Ru1 O2 -109.21(8) . . . . ?
 O3 C3 Ru1 O4 173.23(13) . . . . ?
 O3 C3 Ru1 P1 -22.10(10) . . . . ?
 O3 C3 Ru1 P2 91.86(8) . . . . ?
 O4 C3 O3 Ru1 6.78(13) . . . . ?
 O4 C3 Ru1 C1 53.77(9) . . . . ?
 O4 C3 Ru1 O1 25.60(10) . . . . ?
 O4 C3 Ru1 O2 77.55(8) . . . . ?
 O4 C3 Ru1 O3 -173.23(13) . . . . ?
 O4 C3 Ru1 P1 164.67(6) . . . . ?
 O4 C3 Ru1 P2 -81.37(8) . . . . ?

loop_
  _exptl_crystal_face_index_h
  _exptl_crystal_face_index_k
  _exptl_crystal_face_index_l
  _exptl_crystal_face_perp_dist
  _exptl_oxdiff_crystal_face_indexfrac_h
  _exptl_oxdiff_crystal_face_indexfrac_k
  _exptl_oxdiff_crystal_face_indexfrac_l
  _exptl_oxdiff_crystal_face_x
  _exptl_oxdiff_crystal_face_y
  _exptl_oxdiff_crystal_face_z
 0 -1 0 0.0712 0.0000 -1.0000 0.0000 0.0310 0.0161 0.0208
 0 1 0 0.0712 0.0000 1.0000 0.0000 -0.0310 -0.0161 -0.0208
 -1 0 0 0.1269 -1.0000 -0.0000 0.0000 0.0342 0.0075 -0.0571
 1 0 0 0.1173 1.0000 0.0000 -0.0000 -0.0342 -0.0075 0.0571
 0 0 1 0.0696 -0.0000 -0.0000 1.0000 0.0151 -0.0467 0.0134
 0 0 -1 0.0696 0.0000 0.0000 -1.0000 -0.0151 0.0467 -0.0134
 -1 0 1 0.0947 -1.0000 -0.0000 1.0000 0.0493 -0.0392 -0.0437
 1 1 -1 0.1099 1.0000 1.0000 -1.0000 -0.0803 0.0232 0.0228
 0 -1 -1 0.0722 0.0000 -1.0000 -1.0000 0.0159 0.0628 0.0074
 1 1 1 0.0873 1.0000 1.0000 1.0000 -0.0500 -0.0703 0.0496
 0 2 1 0.0478 0.0000 2.0000 1.0000 -0.0469 -0.0788 -0.0283
#end
data_Compound3f
_audit_creation_date              2011-05-16
_audit_creation_method
;
  Olex2 1.1
  (compiled 2011.02.15 svn.r1672, GUI svn.r3494)
;
_chemical_name_common             ?
_chemical_name_systematic
;
 ? 
;
_chemical_formula_moiety          'C50 H38 F2 O4 P2 Ru'
_chemical_formula_sum             'C50 H38 F2 O4 P2 Ru'
_chemical_formula_weight          903.81
_chemical_melting_point           ?
_chemical_oxdiff_formula          'C50 H38 F2 O4 P2 Ru1'
loop_
  _atom_type_symbol
  _atom_type_description
  _atom_type_scat_dispersion_real
  _atom_type_scat_dispersion_imag
  _atom_type_scat_source
 'C' 'C' 0.0033 0.0016 'International Tables Vol C Tables 4.2.6.8 and 6.1.1.4'
 'H' 'H' 0.0000 0.0000 'International Tables Vol C Tables 4.2.6.8 and 6.1.1.4'
 'F' 'F' 0.0171 0.0103 'International Tables Vol C Tables 4.2.6.8 and 6.1.1.4'
 'O' 'O' 0.0106 0.0060 'International Tables Vol C Tables 4.2.6.8 and 6.1.1.4'
 'P' 'P' 0.1023 0.0942 'International Tables Vol C Tables 4.2.6.8 and 6.1.1.4'
 'Ru' 'Ru' -1.2594 0.8363
 'International Tables Vol C Tables 4.2.6.8 and 6.1.1.4'

_space_group_crystal_system       'triclinic'
_space_group_IT_number            2
_space_group_name_H-M_alt         'P -1'
_space_group_name_Hall            '-P 1'
loop_
  _space_group_symop_id
  _space_group_symop_operation_xyz
 1 'x, y, z'
 2 '-x, -y, -z'

_cell_length_a                    10.9788(7)
_cell_length_b                    12.8555(11)
_cell_length_c                    16.3875(10)
_cell_angle_alpha                 81.267(6)
_cell_angle_beta                  72.065(5)
_cell_angle_gamma                 67.840(7)
_cell_volume                      2036.3(2)
_cell_formula_units_Z             2
_cell_measurement_reflns_used     29348
_cell_measurement_temperature     110.0
_cell_measurement_theta_max       32.0824
_cell_measurement_theta_min       2.8573
_exptl_absorpt_coefficient_mu     0.520
_exptl_absorpt_correction_T_max   0.983
_exptl_absorpt_correction_T_min   0.933
_exptl_absorpt_correction_type    analytical
_exptl_absorpt_process_details
;
CrysAlisPro, Agilent Technologies,
Version 1.171.34.49 (release 20-01-2011 CrysAlis171 .NET)
(compiled Jan 20 2011,15:58:25)
Analytical numeric absorption correction using a multifaceted crystal
model based on expressions derived by R.C. Clark & J.S. Reid.
(Clark, R. C. & Reid, J. S. (1995). Acta Cryst. A51, 887-897)
;
_exptl_crystal_colour             'clear dark orange'
_exptl_crystal_colour_lustre      clear
_exptl_crystal_colour_modifier    dark
_exptl_crystal_colour_primary     orange
_exptl_crystal_density_diffrn     1.474
_exptl_crystal_density_meas       ?
_exptl_crystal_density_method     'not measured'
_exptl_crystal_description        plate
_exptl_crystal_F_000              924
_exptl_crystal_size_max           0.3619
_exptl_crystal_size_mid           0.1883
_exptl_crystal_size_min           0.0682
_exptl_special_details
;
 ? 
;
_diffrn_reflns_av_R_equivalents   0.0324
_diffrn_reflns_av_unetI/netI      0.0315
_diffrn_reflns_limit_h_max        16
_diffrn_reflns_limit_h_min        -16
_diffrn_reflns_limit_k_max        19
_diffrn_reflns_limit_k_min        -19
_diffrn_reflns_limit_l_max        23
_diffrn_reflns_limit_l_min        -24
_diffrn_reflns_number             48274
_diffrn_reflns_theta_full         30.01
_diffrn_reflns_theta_max          32.19
_diffrn_reflns_theta_min          2.86
_diffrn_ambient_temperature       110.0
_diffrn_detector_area_resol_mean  16.1450
_diffrn_measured_fraction_theta_full 0.9987
_diffrn_measured_fraction_theta_max 0.918
_diffrn_measurement_details
;
#__ type_ start__ end____ width___ exp.time_
  1 omega  -86.00  -53.00   1.0000    8.0000
omega____ theta____ kappa____ phi______ frames
    -      -25.0110  132.0000   96.0000 33

#__ type_ start__ end____ width___ exp.time_
  2 omega    5.00   89.00   1.0000    8.0000
omega____ theta____ kappa____ phi______ frames
    -       26.4172   77.0000   30.0000 84

#__ type_ start__ end____ width___ exp.time_
  3 omega  -43.00  -15.00   1.0000    8.0000
omega____ theta____ kappa____ phi______ frames
    -       26.4172  -77.0000  150.0000 28

#__ type_ start__ end____ width___ exp.time_
  4 omega  -43.00   49.00   1.0000    8.0000
omega____ theta____ kappa____ phi______ frames
    -       26.4172  -77.0000 -180.0000 92

#__ type_ start__ end____ width___ exp.time_
  5 omega   71.00   98.00   1.0000    8.0000
omega____ theta____ kappa____ phi______ frames
    -       26.4172   37.0000 -150.0000 27

#__ type_ start__ end____ width___ exp.time_
  6 omega   -3.00   89.00   1.0000    8.0000
omega____ theta____ kappa____ phi______ frames
    -       26.4172   77.0000  -60.0000 92

#__ type_ start__ end____ width___ exp.time_
  7 omega   46.00   91.00   1.0000    8.0000
omega____ theta____ kappa____ phi______ frames
    -       26.4172 -177.0000 -163.0000 45

#__ type_ start__ end____ width___ exp.time_
  8 omega  -43.00    5.00   1.0000    8.0000
omega____ theta____ kappa____ phi______ frames
    -       26.4172  -77.0000  -90.0000 48

#__ type_ start__ end____ width___ exp.time_
  9 omega   -7.00   77.00   1.0000    8.0000
omega____ theta____ kappa____ phi______ frames
    -       26.4172 -114.0000  -26.0000 84

#__ type_ start__ end____ width___ exp.time_
 10 omega  -46.00   52.00   1.0000    8.0000
omega____ theta____ kappa____ phi______ frames
    -       26.4172  -37.0000   30.0000 98

#__ type_ start__ end____ width___ exp.time_
 11 omega   -4.00   97.00   1.0000    8.0000
omega____ theta____ kappa____ phi______ frames
    -       26.4172   77.0000 -120.0000 101

#__ type_ start__ end____ width___ exp.time_
 12 omega  -46.00   52.00   1.0000    8.0000
omega____ theta____ kappa____ phi______ frames
    -       26.4172  -37.0000  120.0000 98

#__ type_ start__ end____ width___ exp.time_
 13 omega  -44.00   23.00   1.0000    8.0000
omega____ theta____ kappa____ phi______ frames
    -       26.4172  -77.0000   30.0000 67

#__ type_ start__ end____ width___ exp.time_
 14 omega    1.00   99.00   1.0000    8.0000
omega____ theta____ kappa____ phi______ frames
    -       26.4172   37.0000 -180.0000 98
;
_diffrn_measurement_device_type   'SuperNova, Single source at offset), Eos'
_diffrn_measurement_method        '\w scans'
_diffrn_orient_matrix_UB_11       0.0317728000
_diffrn_orient_matrix_UB_12       0.0151694000
_diffrn_orient_matrix_UB_13       -0.0423873000
_diffrn_orient_matrix_UB_21       0.0048724000
_diffrn_orient_matrix_UB_22       -0.0509723000
_diffrn_orient_matrix_UB_23       -0.0146799000
_diffrn_orient_matrix_UB_31       -0.0649528000
_diffrn_orient_matrix_UB_32       0.0270183000
_diffrn_orient_matrix_UB_33       -0.0079308000
_diffrn_radiation_monochromator   mirror
_diffrn_radiation_type            'Mo K\a'
_diffrn_radiation_wavelength      0.7107
_diffrn_source                    'SuperNova (Mo) X-ray Source'
_diffrn_standards_decay_%         ?
_diffrn_standards_interval_count  ?
_diffrn_standards_interval_time   ?
_diffrn_standards_number          ?
_reflns_number_gt                 11887
_reflns_number_total              13186
_reflns_odcompleteness_completeness 99.87
_reflns_odcompleteness_iscentric  1
_reflns_odcompleteness_theta      30.01
_reflns_threshold_expression      >2sigma(I)
_computing_cell_refinement
;
CrysAlisPro, Agilent Technologies,
Version 1.171.34.49 (release 20-01-2011 CrysAlis171 .NET)
(compiled Jan 20 2011,15:58:25)
;
_computing_data_collection
;
CrysAlisPro, Agilent Technologies,
Version 1.171.34.49 (release 20-01-2011 CrysAlis171 .NET)
(compiled Jan 20 2011,15:58:25)
;
_computing_data_reduction
;
CrysAlisPro, Agilent Technologies,
Version 1.171.34.49 (release 20-01-2011 CrysAlis171 .NET)
(compiled Jan 20 2011,15:58:25)
;
_computing_molecular_graphics
;
O. V. Dolomanov, L. J. Bourhis, R. J. Gildea, J. A. K. Howard and H. Puschmann,
OLEX2: a complete structure solution, refinement and analysis program.
J. Appl. Cryst. (2009). 42, 339-341.
;
_computing_publication_material
;
O. V. Dolomanov, L. J. Bourhis, R. J. Gildea, J. A. K. Howard and H. Puschmann,
OLEX2: a complete structure solution, refinement and analysis program.
J. Appl. Cryst. (2009). 42, 339-341.
;
_computing_structure_refinement   'SHELXL-97 (Sheldrick, 1997)'
_computing_structure_solution     'SHELXS-97 (Sheldrick, 1990)'
_refine_diff_density_max          0.560
_refine_diff_density_min          -0.579
_refine_diff_density_rms          0.071
_refine_ls_extinction_coef        ?
_refine_ls_extinction_method      none
_refine_ls_goodness_of_fit_ref    1.039
_refine_ls_hydrogen_treatment     constr
_refine_ls_matrix_type            full
_refine_ls_number_parameters      532
_refine_ls_number_reflns          13186
_refine_ls_number_restraints      0
_refine_ls_R_factor_all           0.0340
_refine_ls_R_factor_gt            0.0287
_refine_ls_restrained_S_all       1.039
_refine_ls_shift/su_max           0.001
_refine_ls_shift/su_mean          0.000
_refine_ls_structure_factor_coef  Fsqd
_refine_ls_weighting_details
'calc w=1/[\s^2^(Fo^2^)+(0.0229P)^2^+1.5057P] where P=(Fo^2^+2Fc^2^)/3'
_refine_ls_weighting_scheme       calc
_refine_ls_wR_factor_gt           0.0656
_refine_ls_wR_factor_ref          0.0688
_refine_special_details
;
 Refinement of F^2^ against ALL reflections.  The weighted R-factor wR and 
 goodness of fit S are based on F^2^, conventional R-factors R are based 
 on F, with F set to zero for negative F^2^. The threshold expression of 
 F^2^ > 2sigma(F^2^) is used only for calculating R-factors(gt) etc. and is 
 not relevant to the choice of reflections for refinement.  R-factors based 
 on F^2^ are statistically about twice as large as those based on F, and R- 
 factors based on ALL data will be even larger. 
;
_atom_sites_solution_hydrogens    geom
_atom_sites_solution_primary      direct
_atom_sites_solution_secondary    difmap
loop_
  _atom_site_label
  _atom_site_type_symbol
  _atom_site_fract_x
  _atom_site_fract_y
  _atom_site_fract_z
  _atom_site_U_iso_or_equiv
  _atom_site_adp_type
  _atom_site_occupancy
  _atom_site_symmetry_multiplicity
  _atom_site_calc_flag
  _atom_site_refinement_flags
  _atom_site_disorder_assembly
  _atom_site_disorder_group
 C1 C 0.24577(14) 0.80554(12) 0.54485(9) 0.0148(2) Uani 1 1 d . . .
 C2 C 0.24780(15) 0.82891(12) 0.45299(9) 0.0161(3) Uani 1 1 d . . .
 C3 C 0.37303(16) 0.80591(13) 0.39060(9) 0.0215(3) Uani 1 1 d . . .
 H3 H 0.4559 0.7740 0.4069 0.026 Uiso 1 1 calc R . .
 C4 C 0.37631(19) 0.82981(14) 0.30454(10) 0.0268(3) Uani 1 1 d . . .
 H4 H 0.4608 0.8160 0.2614 0.032 Uiso 1 1 calc R . .
 C5 C 0.2538(2) 0.87418(14) 0.28319(10) 0.0276(4) Uani 1 1 d . . .
 C6 C 0.12883(19) 0.90038(15) 0.34298(11) 0.0283(3) Uani 1 1 d . . .
 H6 H 0.0464 0.9327 0.3262 0.034 Uiso 1 1 calc R . .
 C7 C 0.12689(17) 0.87794(14) 0.42941(10) 0.0235(3) Uani 1 1 d . . .
 H7 H 0.0419 0.8965 0.4724 0.028 Uiso 1 1 calc R . .
 C8 C 0.18353(14) 0.98216(11) 0.75918(9) 0.0140(2) Uani 1 1 d . . .
 C9 C 0.12901(14) 1.08834(12) 0.80477(9) 0.0162(3) Uani 1 1 d . . .
 C10 C 0.15502(16) 1.18360(13) 0.76267(10) 0.0210(3) Uani 1 1 d . . .
 H10 H 0.2039 1.1818 0.7036 0.025 Uiso 1 1 calc R . .
 C11 C 0.10954(18) 1.28125(13) 0.80697(11) 0.0250(3) Uani 1 1 d . . .
 H11 H 0.1263 1.3469 0.7791 0.030 Uiso 1 1 calc R . .
 C12 C 0.03960(18) 1.27997(13) 0.89243(11) 0.0250(3) Uani 1 1 d . . .
 C13 C 0.0123(2) 1.18763(14) 0.93621(11) 0.0316(4) Uani 1 1 d . . .
 H13 H -0.0359 1.1900 0.9954 0.038 Uiso 1 1 calc R . .
 C14 C 0.05744(18) 1.09079(13) 0.89122(10) 0.0267(3) Uani 1 1 d . . .
 H14 H 0.0393 1.0259 0.9196 0.032 Uiso 1 1 calc R . .
 C15 C 0.44771(14) 0.83512(11) 0.82069(9) 0.0140(2) Uani 1 1 d . . .
 C16 C 0.46353(16) 0.93965(12) 0.80821(10) 0.0195(3) Uani 1 1 d . . .
 H16 H 0.4986 0.9662 0.7518 0.023 Uiso 1 1 calc R . .
 C17 C 0.42822(17) 1.00527(13) 0.87799(11) 0.0247(3) Uani 1 1 d . . .
 H17 H 0.4403 1.0759 0.8688 0.030 Uiso 1 1 calc R . .
 C18 C 0.37567(17) 0.96851(14) 0.96053(10) 0.0245(3) Uani 1 1 d . . .
 H18 H 0.3507 1.0141 1.0077 0.029 Uiso 1 1 calc R . .
 C19 C 0.35970(16) 0.86480(14) 0.97384(10) 0.0219(3) Uani 1 1 d . . .
 H19 H 0.3244 0.8388 1.0303 0.026 Uiso 1 1 calc R . .
 C20 C 0.39543(15) 0.79896(13) 0.90447(9) 0.0179(3) Uani 1 1 d . . .
 H20 H 0.3841 0.7280 0.9142 0.022 Uiso 1 1 calc R . .
 C21 C 0.59223(14) 0.80447(12) 0.64272(9) 0.0149(2) Uani 1 1 d . . .
 C22 C 0.56024(14) 0.85516(12) 0.56688(9) 0.0167(3) Uani 1 1 d . . .
 H22 H 0.4729 0.8672 0.5602 0.020 Uiso 1 1 calc R . .
 C23 C 0.65511(16) 0.88837(13) 0.50076(9) 0.0204(3) Uani 1 1 d . . .
 H23 H 0.6331 0.9211 0.4488 0.024 Uiso 1 1 calc R . .
 C24 C 0.78020(17) 0.87399(16) 0.51053(10) 0.0268(3) Uani 1 1 d . . .
 H24 H 0.8439 0.8982 0.4658 0.032 Uiso 1 1 calc R . .
 C25 C 0.81396(18) 0.82382(17) 0.58619(11) 0.0317(4) Uani 1 1 d . . .
 H25 H 0.9007 0.8137 0.5929 0.038 Uiso 1 1 calc R . .
 C26 C 0.72067(16) 0.78867(15) 0.65163(10) 0.0239(3) Uani 1 1 d . . .
 H26 H 0.7443 0.7537 0.7027 0.029 Uiso 1 1 calc R . .
 C27 C 0.58570(13) 0.61347(11) 0.74516(9) 0.0138(2) Uani 1 1 d . . .
 C28 C 0.65993(15) 0.58100(13) 0.80564(9) 0.0204(3) Uani 1 1 d . . .
 H28 H 0.6419 0.6313 0.8484 0.025 Uiso 1 1 calc R . .
 C29 C 0.76074(17) 0.47476(14) 0.80353(10) 0.0258(3) Uani 1 1 d . . .
 H29 H 0.8117 0.4534 0.8447 0.031 Uiso 1 1 calc R . .
 C30 C 0.78754(16) 0.40005(13) 0.74229(11) 0.0247(3) Uani 1 1 d . . .
 H30 H 0.8556 0.3274 0.7419 0.030 Uiso 1 1 calc R . .
 C31 C 0.71453(16) 0.43173(13) 0.68155(11) 0.0242(3) Uani 1 1 d . . .
 H31 H 0.7330 0.3811 0.6390 0.029 Uiso 1 1 calc R . .
 C32 C 0.61427(15) 0.53778(13) 0.68305(10) 0.0195(3) Uani 1 1 d . . .
 H32 H 0.5645 0.5591 0.6413 0.023 Uiso 1 1 calc R . .
 C33 C 0.03597(13) 0.69304(12) 0.80807(9) 0.0143(2) Uani 1 1 d . . .
 C34 C -0.01209(15) 0.62476(13) 0.87499(10) 0.0195(3) Uani 1 1 d . . .
 H34 H 0.0486 0.5528 0.8873 0.023 Uiso 1 1 calc R . .
 C35 C -0.14782(16) 0.66115(15) 0.92363(10) 0.0239(3) Uani 1 1 d . . .
 H35 H -0.1794 0.6143 0.9692 0.029 Uiso 1 1 calc R . .
 C36 C -0.23694(15) 0.76566(14) 0.90556(10) 0.0229(3) Uani 1 1 d . . .
 H36 H -0.3297 0.7907 0.9389 0.027 Uiso 1 1 calc R . .
 C37 C -0.19107(15) 0.83353(13) 0.83909(11) 0.0226(3) Uani 1 1 d . . .
 H37 H -0.2527 0.9049 0.8266 0.027 Uiso 1 1 calc R . .
 C38 C -0.05500(14) 0.79805(12) 0.79025(10) 0.0185(3) Uani 1 1 d . . .
 H38 H -0.0241 0.8454 0.7448 0.022 Uiso 1 1 calc R . .
 C39 C 0.21030(14) 0.55728(11) 0.66522(9) 0.0150(2) Uani 1 1 d . . .
 C40 C 0.33215(15) 0.49793(13) 0.60609(9) 0.0194(3) Uani 1 1 d . . .
 H40 H 0.4158 0.5039 0.6060 0.023 Uiso 1 1 calc R . .
 C41 C 0.33176(16) 0.43047(13) 0.54757(10) 0.0225(3) Uani 1 1 d . . .
 H41 H 0.4155 0.3887 0.5092 0.027 Uiso 1 1 calc R . .
 C42 C 0.20985(18) 0.42373(14) 0.54476(10) 0.0252(3) Uani 1 1 d . . .
 H42 H 0.2099 0.3777 0.5045 0.030 Uiso 1 1 calc R . .
 C43 C 0.08823(17) 0.48454(15) 0.60106(11) 0.0255(3) Uani 1 1 d . . .
 H43 H 0.0043 0.4816 0.5985 0.031 Uiso 1 1 calc R . .
 C44 C 0.08844(15) 0.55015(13) 0.66151(10) 0.0207(3) Uani 1 1 d . . .
 H44 H 0.0046 0.5904 0.7006 0.025 Uiso 1 1 calc R . .
 C45 C 0.29738(14) 0.54485(12) 0.81848(9) 0.0151(2) Uani 1 1 d . . .
 C46 C 0.27948(15) 0.58958(13) 0.89588(9) 0.0185(3) Uani 1 1 d . . .
 H46 H 0.2221 0.6655 0.9070 0.022 Uiso 1 1 calc R . .
 C47 C 0.34421(17) 0.52482(14) 0.95641(10) 0.0222(3) Uani 1 1 d . . .
 H47 H 0.3312 0.5563 1.0086 0.027 Uiso 1 1 calc R . .
 C48 C 0.42793(17) 0.41395(14) 0.94065(10) 0.0244(3) Uani 1 1 d . . .
 H48 H 0.4734 0.3696 0.9817 0.029 Uiso 1 1 calc R . .
 C49 C 0.44522(17) 0.36809(14) 0.86541(11) 0.0265(3) Uani 1 1 d . . .
 H49 H 0.5018 0.2918 0.8551 0.032 Uiso 1 1 calc R . .
 C50 C 0.38021(16) 0.43296(13) 0.80399(10) 0.0226(3) Uani 1 1 d . . .
 H50 H 0.3926 0.4006 0.7523 0.027 Uiso 1 1 calc R . .
 F1 F 0.25774(14) 0.89343(10) 0.19867(6) 0.0407(3) Uani 1 1 d . . .
 F2 F -0.00674(13) 1.37574(8) 0.93559(7) 0.0352(3) Uani 1 1 d . . .
 O1 O 0.35657(10) 0.74579(9) 0.56413(6) 0.01522(19) Uani 1 1 d . . .
 O2 O 0.13869(10) 0.84834(9) 0.60477(6) 0.01669(19) Uani 1 1 d . . .
 O3 O 0.25648(10) 0.97471(8) 0.68168(6) 0.01627(19) Uani 1 1 d . . .
 O4 O 0.16066(10) 0.89517(8) 0.79870(6) 0.01464(18) Uani 1 1 d . . .
 P1 P 0.47003(3) 0.75622(3) 0.72936(2) 0.01169(6) Uani 1 1 d . . .
 P2 P 0.21449(3) 0.64434(3) 0.74253(2) 0.01231(6) Uani 1 1 d . . .
 Ru1 Ru 0.275136(10) 0.795035(9) 0.691987(6) 0.01119(3) Uani 1 1 d . . .

loop_
  _atom_site_aniso_label
  _atom_site_aniso_U_11
  _atom_site_aniso_U_22
  _atom_site_aniso_U_33
  _atom_site_aniso_U_23
  _atom_site_aniso_U_13
  _atom_site_aniso_U_12
 C1 0.0149(6) 0.0173(6) 0.0136(6) -0.0011(5) -0.0038(5) -0.0070(5)
 C2 0.0192(6) 0.0169(6) 0.0130(6) -0.0008(5) -0.0046(5) -0.0070(5)
 C3 0.0213(7) 0.0230(7) 0.0161(6) -0.0015(5) -0.0026(5) -0.0051(6)
 C4 0.0331(9) 0.0237(8) 0.0155(7) -0.0012(6) 0.0006(6) -0.0069(7)
 C5 0.0478(10) 0.0201(7) 0.0133(6) 0.0019(5) -0.0104(7) -0.0095(7)
 C6 0.0332(9) 0.0313(9) 0.0227(8) 0.0032(6) -0.0163(7) -0.0086(7)
 C7 0.0222(7) 0.0305(8) 0.0190(7) 0.0013(6) -0.0068(6) -0.0106(6)
 C8 0.0124(6) 0.0142(6) 0.0143(6) -0.0004(5) -0.0043(5) -0.0029(5)
 C9 0.0159(6) 0.0131(6) 0.0174(6) -0.0021(5) -0.0040(5) -0.0026(5)
 C10 0.0242(7) 0.0170(7) 0.0199(7) 0.0002(5) -0.0056(6) -0.0062(6)
 C11 0.0311(8) 0.0149(7) 0.0288(8) 0.0003(6) -0.0101(7) -0.0069(6)
 C12 0.0313(8) 0.0148(7) 0.0262(8) -0.0057(6) -0.0120(7) -0.0001(6)
 C13 0.0429(10) 0.0207(8) 0.0207(7) -0.0056(6) 0.0007(7) -0.0053(7)
 C14 0.0346(9) 0.0165(7) 0.0201(7) -0.0029(5) 0.0016(6) -0.0059(6)
 C15 0.0134(6) 0.0151(6) 0.0142(6) -0.0022(5) -0.0044(5) -0.0045(5)
 C16 0.0217(7) 0.0178(7) 0.0199(7) -0.0010(5) -0.0058(5) -0.0079(6)
 C17 0.0293(8) 0.0192(7) 0.0287(8) -0.0053(6) -0.0084(6) -0.0100(6)
 C18 0.0235(7) 0.0264(8) 0.0236(7) -0.0116(6) -0.0071(6) -0.0042(6)
 C19 0.0208(7) 0.0280(8) 0.0151(6) -0.0043(5) -0.0039(5) -0.0060(6)
 C20 0.0194(6) 0.0203(7) 0.0148(6) -0.0010(5) -0.0043(5) -0.0079(5)
 C21 0.0143(6) 0.0169(6) 0.0132(6) 0.0003(5) -0.0018(5) -0.0069(5)
 C22 0.0150(6) 0.0188(6) 0.0158(6) 0.0013(5) -0.0038(5) -0.0066(5)
 C23 0.0201(7) 0.0235(7) 0.0160(6) 0.0047(5) -0.0040(5) -0.0086(6)
 C24 0.0217(7) 0.0386(9) 0.0211(7) 0.0080(6) -0.0027(6) -0.0177(7)
 C25 0.0201(7) 0.0522(11) 0.0275(8) 0.0141(8) -0.0100(6) -0.0210(8)
 C26 0.0186(7) 0.0361(9) 0.0200(7) 0.0077(6) -0.0079(6) -0.0141(6)
 C27 0.0115(5) 0.0145(6) 0.0144(6) 0.0002(5) -0.0025(5) -0.0046(5)
 C28 0.0197(7) 0.0215(7) 0.0173(6) -0.0026(5) -0.0073(5) -0.0018(6)
 C29 0.0222(7) 0.0267(8) 0.0219(7) 0.0019(6) -0.0089(6) -0.0004(6)
 C30 0.0185(7) 0.0175(7) 0.0318(8) -0.0006(6) -0.0049(6) -0.0013(6)
 C31 0.0198(7) 0.0198(7) 0.0319(8) -0.0099(6) -0.0036(6) -0.0051(6)
 C32 0.0165(6) 0.0202(7) 0.0229(7) -0.0042(5) -0.0067(5) -0.0055(5)
 C33 0.0110(5) 0.0168(6) 0.0145(6) -0.0035(5) -0.0008(5) -0.0052(5)
 C34 0.0147(6) 0.0216(7) 0.0214(7) 0.0008(5) -0.0028(5) -0.0079(5)
 C35 0.0181(7) 0.0316(8) 0.0222(7) -0.0012(6) 0.0008(6) -0.0138(6)
 C36 0.0130(6) 0.0285(8) 0.0265(7) -0.0110(6) 0.0019(5) -0.0086(6)
 C37 0.0131(6) 0.0207(7) 0.0312(8) -0.0067(6) -0.0028(6) -0.0032(5)
 C38 0.0137(6) 0.0189(7) 0.0214(7) -0.0020(5) -0.0028(5) -0.0053(5)
 C39 0.0153(6) 0.0142(6) 0.0149(6) -0.0016(5) -0.0036(5) -0.0046(5)
 C40 0.0159(6) 0.0226(7) 0.0185(6) -0.0047(5) -0.0035(5) -0.0049(5)
 C41 0.0216(7) 0.0232(7) 0.0187(7) -0.0061(6) -0.0043(6) -0.0026(6)
 C42 0.0317(8) 0.0248(8) 0.0219(7) -0.0070(6) -0.0076(6) -0.0106(7)
 C43 0.0235(7) 0.0336(9) 0.0249(8) -0.0078(6) -0.0061(6) -0.0141(7)
 C44 0.0170(6) 0.0252(7) 0.0209(7) -0.0057(6) -0.0029(5) -0.0085(6)
 C45 0.0127(6) 0.0168(6) 0.0150(6) 0.0019(5) -0.0026(5) -0.0064(5)
 C46 0.0192(7) 0.0206(7) 0.0173(6) -0.0002(5) -0.0045(5) -0.0093(5)
 C47 0.0264(8) 0.0291(8) 0.0162(6) 0.0030(6) -0.0070(6) -0.0157(6)
 C48 0.0246(8) 0.0289(8) 0.0216(7) 0.0090(6) -0.0100(6) -0.0125(6)
 C49 0.0254(8) 0.0204(7) 0.0266(8) 0.0022(6) -0.0080(6) -0.0010(6)
 C50 0.0241(7) 0.0198(7) 0.0192(7) -0.0017(5) -0.0058(6) -0.0022(6)
 F1 0.0662(8) 0.0351(6) 0.0152(4) 0.0041(4) -0.0154(5) -0.0103(6)
 F2 0.0526(7) 0.0164(5) 0.0328(5) -0.0093(4) -0.0141(5) -0.0029(5)
 O1 0.0127(4) 0.0193(5) 0.0123(4) -0.0021(4) -0.0031(3) -0.0040(4)
 O2 0.0117(4) 0.0229(5) 0.0132(4) -0.0019(4) -0.0026(4) -0.0037(4)
 O3 0.0170(5) 0.0163(5) 0.0132(4) -0.0005(3) -0.0013(4) -0.0056(4)
 O4 0.0146(4) 0.0140(4) 0.0129(4) -0.0011(3) -0.0006(3) -0.0048(4)
 P1 0.01167(14) 0.01317(15) 0.01020(14) -0.00025(11) -0.00273(11) -0.00461(12)
 P2 0.01042(14) 0.01323(15) 0.01211(14) -0.00161(11) -0.00181(11) -0.00346(12)
 Ru1 0.01001(5) 0.01243(5) 0.01010(5) -0.00069(3) -0.00217(3) -0.00319(4)

_geom_special_details
;
 All esds (except the esd in the dihedral angle between two l.s. planes) 
 are estimated using the full covariance matrix.  The cell esds are taken 
 into account individually in the estimation of esds in distances, angles 
 and torsion angles; correlations between esds in cell parameters are only 
 used when they are defined by crystal symmetry.  An approximate (isotropic) 
 treatment of cell esds is used for estimating esds involving l.s. planes. 
;
loop_
  _geom_bond_atom_site_label_1
  _geom_bond_atom_site_label_2
  _geom_bond_distance
  _geom_bond_site_symmetry_2
  _geom_bond_publ_flag
 C1 C2 1.4847(19) . ?
 C1 O1 1.2757(17) . ?
 C1 O2 1.2705(16) . ?
 C1 Ru1 2.5065(14) . ?
 C2 C3 1.394(2) . ?
 C2 C7 1.385(2) . ?
 C3 H3 0.9500 . ?
 C3 C4 1.389(2) . ?
 C4 H4 0.9500 . ?
 C4 C5 1.381(3) . ?
 C5 C6 1.371(3) . ?
 C5 F1 1.3596(18) . ?
 C6 H6 0.9500 . ?
 C6 C7 1.397(2) . ?
 C7 H7 0.9500 . ?
 C8 C9 1.4825(19) . ?
 C8 O3 1.2713(16) . ?
 C8 O4 1.2746(16) . ?
 C8 Ru1 2.5115(14) . ?
 C9 C10 1.394(2) . ?
 C9 C14 1.391(2) . ?
 C10 H10 0.9500 . ?
 C10 C11 1.390(2) . ?
 C11 H11 0.9500 . ?
 C11 C12 1.375(2) . ?
 C12 C13 1.375(2) . ?
 C12 F2 1.3584(17) . ?
 C13 H13 0.9500 . ?
 C13 C14 1.388(2) . ?
 C14 H14 0.9500 . ?
 C15 C16 1.396(2) . ?
 C15 C20 1.3974(19) . ?
 C15 P1 1.8375(14) . ?
 C16 H16 0.9500 . ?
 C16 C17 1.394(2) . ?
 C17 H17 0.9500 . ?
 C17 C18 1.384(2) . ?
 C18 H18 0.9500 . ?
 C18 C19 1.386(2) . ?
 C19 H19 0.9500 . ?
 C19 C20 1.389(2) . ?
 C20 H20 0.9500 . ?
 C21 C22 1.3940(19) . ?
 C21 C26 1.397(2) . ?
 C21 P1 1.8406(14) . ?
 C22 H22 0.9500 . ?
 C22 C23 1.3932(19) . ?
 C23 H23 0.9500 . ?
 C23 C24 1.371(2) . ?
 C24 H24 0.9500 . ?
 C24 C25 1.397(2) . ?
 C25 H25 0.9500 . ?
 C25 C26 1.389(2) . ?
 C26 H26 0.9500 . ?
 C27 C28 1.391(2) . ?
 C27 C32 1.398(2) . ?
 C27 P1 1.8296(14) . ?
 C28 H28 0.9500 . ?
 C28 C29 1.393(2) . ?
 C29 H29 0.9500 . ?
 C29 C30 1.383(2) . ?
 C30 H30 0.9500 . ?
 C30 C31 1.386(2) . ?
 C31 H31 0.9500 . ?
 C31 C32 1.390(2) . ?
 C32 H32 0.9500 . ?
 C33 C34 1.397(2) . ?
 C33 C38 1.396(2) . ?
 C33 P2 1.8355(13) . ?
 C34 H34 0.9500 . ?
 C34 C35 1.389(2) . ?
 C35 H35 0.9500 . ?
 C35 C36 1.384(2) . ?
 C36 H36 0.9500 . ?
 C36 C37 1.381(2) . ?
 C37 H37 0.9500 . ?
 C37 C38 1.393(2) . ?
 C38 H38 0.9500 . ?
 C39 C40 1.4025(19) . ?
 C39 C44 1.395(2) . ?
 C39 P2 1.8344(14) . ?
 C40 H40 0.9500 . ?
 C40 C41 1.389(2) . ?
 C41 H41 0.9500 . ?
 C41 C42 1.388(2) . ?
 C42 H42 0.9500 . ?
 C42 C43 1.385(2) . ?
 C43 H43 0.9500 . ?
 C43 C44 1.396(2) . ?
 C44 H44 0.9500 . ?
 C45 C46 1.400(2) . ?
 C45 C50 1.391(2) . ?
 C45 P2 1.8301(14) . ?
 C46 H46 0.9500 . ?
 C46 C47 1.385(2) . ?
 C47 H47 0.9500 . ?
 C47 C48 1.386(2) . ?
 C48 H48 0.9500 . ?
 C48 C49 1.377(2) . ?
 C49 H49 0.9500 . ?
 C49 C50 1.399(2) . ?
 C50 H50 0.9500 . ?
 O1 Ru1 2.1005(10) . ?
 O2 Ru1 2.2368(10) . ?
 O3 Ru1 2.2252(10) . ?
 O4 Ru1 2.0986(10) . ?
 P1 Ru1 2.2609(4) . ?
 P2 Ru1 2.2424(4) . ?

loop_
  _geom_angle_atom_site_label_1
  _geom_angle_atom_site_label_2
  _geom_angle_atom_site_label_3
  _geom_angle
  _geom_angle_site_symmetry_1
  _geom_angle_site_symmetry_3
  _geom_angle_publ_flag
 C2 C1 Ru1 166.59(10) . . ?
 O1 C1 C2 119.05(12) . . ?
 O1 C1 Ru1 56.84(7) . . ?
 O2 C1 C2 121.90(13) . . ?
 O2 C1 O1 118.93(12) . . ?
 O2 C1 Ru1 62.98(7) . . ?
 C3 C2 C1 119.24(13) . . ?
 C7 C2 C1 120.61(13) . . ?
 C7 C2 C3 120.08(14) . . ?
 C2 C3 H3 120.1 . . ?
 C4 C3 C2 119.83(15) . . ?
 C4 C3 H3 120.1 . . ?
 C3 C4 H4 120.8 . . ?
 C5 C4 C3 118.44(15) . . ?
 C5 C4 H4 120.8 . . ?
 C6 C5 C4 123.23(15) . . ?
 F1 C5 C4 118.18(16) . . ?
 F1 C5 C6 118.59(17) . . ?
 C5 C6 H6 121.1 . . ?
 C5 C6 C7 117.73(16) . . ?
 C7 C6 H6 121.1 . . ?
 C2 C7 C6 120.60(15) . . ?
 C2 C7 H7 119.7 . . ?
 C6 C7 H7 119.7 . . ?
 C9 C8 Ru1 175.99(10) . . ?
 O3 C8 C9 121.36(12) . . ?
 O3 C8 O4 118.82(12) . . ?
 O3 C8 Ru1 62.26(7) . . ?
 O4 C8 C9 119.79(12) . . ?
 O4 C8 Ru1 56.56(7) . . ?
 C10 C9 C8 120.36(13) . . ?
 C14 C9 C8 119.50(13) . . ?
 C14 C9 C10 120.06(14) . . ?
 C9 C10 H10 119.9 . . ?
 C11 C10 C9 120.10(14) . . ?
 C11 C10 H10 119.9 . . ?
 C10 C11 H11 121.0 . . ?
 C12 C11 C10 117.97(15) . . ?
 C12 C11 H11 121.0 . . ?
 C13 C12 C11 123.62(15) . . ?
 F2 C12 C11 118.13(15) . . ?
 F2 C12 C13 118.24(15) . . ?
 C12 C13 H13 121.0 . . ?
 C12 C13 C14 117.92(15) . . ?
 C14 C13 H13 121.0 . . ?
 C9 C14 H14 119.8 . . ?
 C13 C14 C9 120.32(15) . . ?
 C13 C14 H14 119.8 . . ?
 C16 C15 C20 118.22(13) . . ?
 C16 C15 P1 121.13(11) . . ?
 C20 C15 P1 120.03(11) . . ?
 C15 C16 H16 119.8 . . ?
 C17 C16 C15 120.38(14) . . ?
 C17 C16 H16 119.8 . . ?
 C16 C17 H17 119.7 . . ?
 C18 C17 C16 120.65(15) . . ?
 C18 C17 H17 119.7 . . ?
 C17 C18 H18 120.2 . . ?
 C17 C18 C19 119.55(14) . . ?
 C19 C18 H18 120.2 . . ?
 C18 C19 H19 120.0 . . ?
 C18 C19 C20 119.92(14) . . ?
 C20 C19 H19 120.0 . . ?
 C15 C20 H20 119.4 . . ?
 C19 C20 C15 121.26(14) . . ?
 C19 C20 H20 119.4 . . ?
 C22 C21 C26 118.79(13) . . ?
 C22 C21 P1 121.17(11) . . ?
 C26 C21 P1 120.03(11) . . ?
 C21 C22 H22 119.7 . . ?
 C23 C22 C21 120.63(13) . . ?
 C23 C22 H22 119.7 . . ?
 C22 C23 H23 119.9 . . ?
 C24 C23 C22 120.18(14) . . ?
 C24 C23 H23 119.9 . . ?
 C23 C24 H24 120.0 . . ?
 C23 C24 C25 120.04(14) . . ?
 C25 C24 H24 120.0 . . ?
 C24 C25 H25 120.0 . . ?
 C26 C25 C24 119.96(15) . . ?
 C26 C25 H25 120.0 . . ?
 C21 C26 H26 119.8 . . ?
 C25 C26 C21 120.38(14) . . ?
 C25 C26 H26 119.8 . . ?
 C28 C27 C32 118.80(13) . . ?
 C28 C27 P1 124.82(11) . . ?
 C32 C27 P1 115.71(11) . . ?
 C27 C28 H28 120.0 . . ?
 C27 C28 C29 120.00(14) . . ?
 C29 C28 H28 120.0 . . ?
 C28 C29 H29 119.6 . . ?
 C30 C29 C28 120.81(15) . . ?
 C30 C29 H29 119.6 . . ?
 C29 C30 H30 120.2 . . ?
 C29 C30 C31 119.63(15) . . ?
 C31 C30 H30 120.2 . . ?
 C30 C31 H31 120.1 . . ?
 C30 C31 C32 119.83(15) . . ?
 C32 C31 H31 120.1 . . ?
 C27 C32 H32 119.5 . . ?
 C31 C32 C27 120.92(14) . . ?
 C31 C32 H32 119.5 . . ?
 C34 C33 P2 120.76(11) . . ?
 C38 C33 C34 118.90(13) . . ?
 C38 C33 P2 120.32(11) . . ?
 C33 C34 H34 119.7 . . ?
 C35 C34 C33 120.63(14) . . ?
 C35 C34 H34 119.7 . . ?
 C34 C35 H35 120.0 . . ?
 C36 C35 C34 119.94(15) . . ?
 C36 C35 H35 120.0 . . ?
 C35 C36 H36 120.0 . . ?
 C37 C36 C35 120.02(14) . . ?
 C37 C36 H36 120.0 . . ?
 C36 C37 H37 119.8 . . ?
 C36 C37 C38 120.47(15) . . ?
 C38 C37 H37 119.8 . . ?
 C33 C38 H38 120.0 . . ?
 C37 C38 C33 120.05(14) . . ?
 C37 C38 H38 120.0 . . ?
 C40 C39 P2 119.63(11) . . ?
 C44 C39 C40 118.29(13) . . ?
 C44 C39 P2 122.06(11) . . ?
 C39 C40 H40 119.7 . . ?
 C41 C40 C39 120.67(14) . . ?
 C41 C40 H40 119.7 . . ?
 C40 C41 H41 119.8 . . ?
 C42 C41 C40 120.44(14) . . ?
 C42 C41 H41 119.8 . . ?
 C41 C42 H42 120.2 . . ?
 C43 C42 C41 119.50(14) . . ?
 C43 C42 H42 120.2 . . ?
 C42 C43 H43 119.9 . . ?
 C42 C43 C44 120.28(15) . . ?
 C44 C43 H43 119.9 . . ?
 C39 C44 C43 120.76(14) . . ?
 C39 C44 H44 119.6 . . ?
 C43 C44 H44 119.6 . . ?
 C46 C45 P2 115.40(11) . . ?
 C50 C45 C46 118.55(13) . . ?
 C50 C45 P2 125.97(11) . . ?
 C45 C46 H46 119.5 . . ?
 C47 C46 C45 121.02(14) . . ?
 C47 C46 H46 119.5 . . ?
 C46 C47 H47 120.1 . . ?
 C46 C47 C48 119.83(15) . . ?
 C48 C47 H47 120.1 . . ?
 C47 C48 H48 120.0 . . ?
 C49 C48 C47 119.95(15) . . ?
 C49 C48 H48 120.0 . . ?
 C48 C49 H49 119.7 . . ?
 C48 C49 C50 120.53(15) . . ?
 C50 C49 H49 119.7 . . ?
 C45 C50 C49 120.10(15) . . ?
 C45 C50 H50 119.9 . . ?
 C49 C50 H50 119.9 . . ?
 C1 O1 Ru1 92.60(8) . . ?
 C1 O2 Ru1 86.62(8) . . ?
 C8 O3 Ru1 87.37(8) . . ?
 C8 O4 Ru1 92.99(8) . . ?
 C15 P1 C21 102.31(6) . . ?
 C15 P1 Ru1 113.73(5) . . ?
 C21 P1 Ru1 109.99(5) . . ?
 C27 P1 C15 106.26(6) . . ?
 C27 P1 C21 97.88(6) . . ?
 C27 P1 Ru1 123.63(5) . . ?
 C33 P2 Ru1 108.40(5) . . ?
 C39 P2 C33 102.14(6) . . ?
 C39 P2 Ru1 118.21(5) . . ?
 C45 P2 C33 100.77(6) . . ?
 C45 P2 C39 105.32(6) . . ?
 C45 P2 Ru1 119.31(5) . . ?
 C1 Ru1 C8 114.10(5) . . ?
 O1 Ru1 C1 30.56(4) . . ?
 O1 Ru1 C8 132.99(4) . . ?
 O1 Ru1 O2 60.65(4) . . ?
 O1 Ru1 O3 103.57(4) . . ?
 O1 Ru1 P1 100.26(3) . . ?
 O1 Ru1 P2 94.92(3) . . ?
 O2 Ru1 C1 30.40(4) . . ?
 O2 Ru1 C8 95.22(4) . . ?
 O2 Ru1 P1 156.57(3) . . ?
 O2 Ru1 P2 91.98(3) . . ?
 O3 Ru1 C1 91.92(4) . . ?
 O3 Ru1 C8 30.38(4) . . ?
 O3 Ru1 O2 85.14(4) . . ?
 O3 Ru1 P1 86.74(3) . . ?
 O3 Ru1 P2 156.79(3) . . ?
 O4 Ru1 C1 132.21(4) . . ?
 O4 Ru1 C8 30.45(4) . . ?
 O4 Ru1 O1 160.43(4) . . ?
 O4 Ru1 O2 104.03(4) . . ?
 O4 Ru1 O3 60.83(4) . . ?
 O4 Ru1 P1 91.00(3) . . ?
 O4 Ru1 P2 97.88(3) . . ?
 P1 Ru1 C1 128.38(3) . . ?
 P1 Ru1 C8 88.70(3) . . ?
 P2 Ru1 C1 97.19(3) . . ?
 P2 Ru1 C8 127.79(3) . . ?
 P2 Ru1 P1 103.828(14) . . ?

loop_
  _geom_torsion_atom_site_label_1
  _geom_torsion_atom_site_label_2
  _geom_torsion_atom_site_label_3
  _geom_torsion_atom_site_label_4
  _geom_torsion
  _geom_torsion_site_symmetry_1
  _geom_torsion_site_symmetry_2
  _geom_torsion_site_symmetry_3
  _geom_torsion_site_symmetry_4
  _geom_torsion_publ_flag
 C1 C2 C3 C4 -178.51(14) . . . . ?
 C1 C2 C7 C6 179.71(15) . . . . ?
 C1 O1 Ru1 C8 -61.27(10) . . . . ?
 C1 O1 Ru1 O2 6.31(8) . . . . ?
 C1 O1 Ru1 O3 -70.05(8) . . . . ?
 C1 O1 Ru1 O4 -34.96(16) . . . . ?
 C1 O1 Ru1 P1 -159.15(8) . . . . ?
 C1 O1 Ru1 P2 95.82(8) . . . . ?
 C1 O2 Ru1 C8 130.89(8) . . . . ?
 C1 O2 Ru1 O1 -6.34(8) . . . . ?
 C1 O2 Ru1 O3 102.20(8) . . . . ?
 C1 O2 Ru1 O4 160.50(8) . . . . ?
 C1 O2 Ru1 P1 32.07(13) . . . . ?
 C1 O2 Ru1 P2 -100.87(8) . . . . ?
 C2 C1 O1 Ru1 165.08(11) . . . . ?
 C2 C1 O2 Ru1 -165.64(12) . . . . ?
 C2 C1 Ru1 C8 59.2(4) . . . . ?
 C2 C1 Ru1 O1 -76.1(4) . . . . ?
 C2 C1 Ru1 O2 114.8(5) . . . . ?
 C2 C1 Ru1 O3 37.8(4) . . . . ?
 C2 C1 Ru1 O4 88.8(4) . . . . ?
 C2 C1 Ru1 P1 -49.6(5) . . . . ?
 C2 C1 Ru1 P2 -163.6(4) . . . . ?
 C2 C3 C4 C5 -1.2(2) . . . . ?
 C3 C2 C7 C6 2.8(2) . . . . ?
 C3 C4 C5 C6 2.9(3) . . . . ?
 C3 C4 C5 F1 -177.55(15) . . . . ?
 C4 C5 C6 C7 -1.7(3) . . . . ?
 C5 C6 C7 C2 -1.2(3) . . . . ?
 C7 C2 C3 C4 -1.5(2) . . . . ?
 C8 C9 C10 C11 -176.74(14) . . . . ?
 C8 C9 C14 C13 176.35(16) . . . . ?
 C8 O3 Ru1 C1 138.67(8) . . . . ?
 C8 O3 Ru1 O1 167.23(8) . . . . ?
 C8 O3 Ru1 O2 109.01(8) . . . . ?
 C8 O3 Ru1 O4 -0.03(8) . . . . ?
 C8 O3 Ru1 P1 -92.99(8) . . . . ?
 C8 O3 Ru1 P2 25.34(13) . . . . ?
 C8 O4 Ru1 C1 -62.93(10) . . . . ?
 C8 O4 Ru1 O1 -39.77(16) . . . . ?
 C8 O4 Ru1 O2 -76.11(8) . . . . ?
 C8 O4 Ru1 O3 0.03(8) . . . . ?
 C8 O4 Ru1 P1 85.73(8) . . . . ?
 C8 O4 Ru1 P2 -170.16(8) . . . . ?
 C9 C8 O3 Ru1 178.00(12) . . . . ?
 C9 C8 O4 Ru1 -178.03(11) . . . . ?
 C9 C10 C11 C12 0.2(2) . . . . ?
 C10 C9 C14 C13 -0.4(3) . . . . ?
 C10 C11 C12 C13 0.0(3) . . . . ?
 C10 C11 C12 F2 -179.04(15) . . . . ?
 C11 C12 C13 C14 -0.4(3) . . . . ?
 C12 C13 C14 C9 0.6(3) . . . . ?
 C14 C9 C10 C11 0.0(2) . . . . ?
 C15 C16 C17 C18 -0.7(2) . . . . ?
 C15 P1 Ru1 C1 144.32(6) . . . . ?
 C15 P1 Ru1 C8 24.12(6) . . . . ?
 C15 P1 Ru1 O1 157.67(6) . . . . ?
 C15 P1 Ru1 O2 124.28(8) . . . . ?
 C15 P1 Ru1 O3 54.46(6) . . . . ?
 C15 P1 Ru1 O4 -6.24(6) . . . . ?
 C15 P1 Ru1 P2 -104.61(5) . . . . ?
 C16 C15 C20 C19 0.1(2) . . . . ?
 C16 C15 P1 C21 28.33(13) . . . . ?
 C16 C15 P1 C27 130.45(12) . . . . ?
 C16 C15 P1 Ru1 -90.22(12) . . . . ?
 C16 C17 C18 C19 0.8(3) . . . . ?
 C17 C18 C19 C20 -0.5(2) . . . . ?
 C18 C19 C20 C15 0.0(2) . . . . ?
 C20 C15 C16 C17 0.2(2) . . . . ?
 C20 C15 P1 C21 -160.85(12) . . . . ?
 C20 C15 P1 C27 -58.74(13) . . . . ?
 C20 C15 P1 Ru1 80.59(12) . . . . ?
 C21 C22 C23 C24 -1.6(2) . . . . ?
 C21 P1 Ru1 C1 30.27(6) . . . . ?
 C21 P1 Ru1 C8 -89.93(6) . . . . ?
 C21 P1 Ru1 O1 43.62(6) . . . . ?
 C21 P1 Ru1 O2 10.23(9) . . . . ?
 C21 P1 Ru1 O3 -59.59(5) . . . . ?
 C21 P1 Ru1 O4 -120.30(6) . . . . ?
 C21 P1 Ru1 P2 141.34(5) . . . . ?
 C22 C21 C26 C25 0.5(2) . . . . ?
 C22 C21 P1 C15 -122.06(12) . . . . ?
 C22 C21 P1 C27 129.31(12) . . . . ?
 C22 C21 P1 Ru1 -0.89(13) . . . . ?
 C22 C23 C24 C25 1.3(3) . . . . ?
 C23 C24 C25 C26 -0.1(3) . . . . ?
 C24 C25 C26 C21 -0.8(3) . . . . ?
 C26 C21 C22 C23 0.7(2) . . . . ?
 C26 C21 P1 C15 59.14(14) . . . . ?
 C26 C21 P1 C27 -49.49(14) . . . . ?
 C26 C21 P1 Ru1 -179.68(11) . . . . ?
 C27 C28 C29 C30 -0.6(3) . . . . ?
 C27 P1 Ru1 C1 -84.39(7) . . . . ?
 C27 P1 Ru1 C8 155.41(6) . . . . ?
 C27 P1 Ru1 O1 -71.05(6) . . . . ?
 C27 P1 Ru1 O2 -104.44(9) . . . . ?
 C27 P1 Ru1 O3 -174.26(6) . . . . ?
 C27 P1 Ru1 O4 125.04(6) . . . . ?
 C27 P1 Ru1 P2 26.67(5) . . . . ?
 C28 C27 C32 C31 0.2(2) . . . . ?
 C28 C27 P1 C15 -11.03(14) . . . . ?
 C28 C27 P1 C21 94.30(13) . . . . ?
 C28 C27 P1 Ru1 -145.26(11) . . . . ?
 C28 C29 C30 C31 0.9(3) . . . . ?
 C29 C30 C31 C32 -0.6(2) . . . . ?
 C30 C31 C32 C27 0.0(2) . . . . ?
 C32 C27 C28 C29 0.1(2) . . . . ?
 C32 C27 P1 C15 178.59(11) . . . . ?
 C32 C27 P1 C21 -76.08(12) . . . . ?
 C32 C27 P1 Ru1 44.36(12) . . . . ?
 C33 C34 C35 C36 0.4(2) . . . . ?
 C33 P2 Ru1 C1 -99.65(6) . . . . ?
 C33 P2 Ru1 C8 28.57(6) . . . . ?
 C33 P2 Ru1 O1 -130.30(6) . . . . ?
 C33 P2 Ru1 O2 -69.60(5) . . . . ?
 C33 P2 Ru1 O3 12.67(9) . . . . ?
 C33 P2 Ru1 O4 34.86(6) . . . . ?
 C33 P2 Ru1 P1 127.85(5) . . . . ?
 C34 C33 C38 C37 0.3(2) . . . . ?
 C34 C33 P2 C39 81.88(13) . . . . ?
 C34 C33 P2 C45 -26.54(13) . . . . ?
 C34 C33 P2 Ru1 -152.59(11) . . . . ?
 C34 C35 C36 C37 0.2(2) . . . . ?
 C35 C36 C37 C38 -0.5(2) . . . . ?
 C36 C37 C38 C33 0.3(2) . . . . ?
 C38 C33 C34 C35 -0.7(2) . . . . ?
 C38 C33 P2 C39 -96.41(12) . . . . ?
 C38 C33 P2 C45 155.16(12) . . . . ?
 C38 C33 P2 Ru1 29.12(13) . . . . ?
 C39 C40 C41 C42 2.2(2) . . . . ?
 C39 P2 Ru1 C1 15.82(6) . . . . ?
 C39 P2 Ru1 C8 144.04(6) . . . . ?
 C39 P2 Ru1 O1 -14.83(6) . . . . ?
 C39 P2 Ru1 O2 45.87(6) . . . . ?
 C39 P2 Ru1 O3 128.14(9) . . . . ?
 C39 P2 Ru1 O4 150.33(6) . . . . ?
 C39 P2 Ru1 P1 -116.68(5) . . . . ?
 C40 C39 C44 C43 0.7(2) . . . . ?
 C40 C39 P2 C33 -175.91(12) . . . . ?
 C40 C39 P2 C45 -71.01(13) . . . . ?
 C40 C39 P2 Ru1 65.29(13) . . . . ?
 C40 C41 C42 C43 -0.2(3) . . . . ?
 C41 C42 C43 C44 -1.5(3) . . . . ?
 C42 C43 C44 C39 1.2(3) . . . . ?
 C44 C39 C40 C41 -2.4(2) . . . . ?
 C44 C39 P2 C33 5.85(14) . . . . ?
 C44 C39 P2 C45 110.75(13) . . . . ?
 C44 C39 P2 Ru1 -112.96(12) . . . . ?
 C45 C46 C47 C48 -0.1(2) . . . . ?
 C45 P2 Ru1 C1 145.98(6) . . . . ?
 C45 P2 Ru1 C8 -85.80(7) . . . . ?
 C45 P2 Ru1 O1 115.33(6) . . . . ?
 C45 P2 Ru1 O2 176.04(6) . . . . ?
 C45 P2 Ru1 O3 -101.69(9) . . . . ?
 C45 P2 Ru1 O4 -79.50(6) . . . . ?
 C45 P2 Ru1 P1 13.49(5) . . . . ?
 C46 C45 C50 C49 -1.0(2) . . . . ?
 C46 C45 P2 C33 -57.49(12) . . . . ?
 C46 C45 P2 C39 -163.40(11) . . . . ?
 C46 C45 P2 Ru1 60.88(12) . . . . ?
 C46 C47 C48 C49 -0.8(2) . . . . ?
 C47 C48 C49 C50 0.8(3) . . . . ?
 C48 C49 C50 C45 0.1(3) . . . . ?
 C50 C45 C46 C47 1.0(2) . . . . ?
 C50 C45 P2 C33 125.96(14) . . . . ?
 C50 C45 P2 C39 20.05(15) . . . . ?
 C50 C45 P2 Ru1 -115.66(13) . . . . ?
 F1 C5 C6 C7 178.77(15) . . . . ?
 F2 C12 C13 C14 178.64(17) . . . . ?
 O1 C1 C2 C3 -13.3(2) . . . . ?
 O1 C1 C2 C7 169.78(14) . . . . ?
 O1 C1 O2 Ru1 10.43(13) . . . . ?
 O1 C1 Ru1 C8 135.36(8) . . . . ?
 O1 C1 Ru1 O2 -169.09(13) . . . . ?
 O1 C1 Ru1 O3 113.90(8) . . . . ?
 O1 C1 Ru1 O4 164.98(7) . . . . ?
 O1 C1 Ru1 P1 26.54(10) . . . . ?
 O1 C1 Ru1 P2 -87.50(8) . . . . ?
 O2 C1 C2 C3 162.80(14) . . . . ?
 O2 C1 C2 C7 -14.2(2) . . . . ?
 O2 C1 O1 Ru1 -11.11(13) . . . . ?
 O2 C1 Ru1 C8 -55.55(9) . . . . ?
 O2 C1 Ru1 O1 169.09(13) . . . . ?
 O2 C1 Ru1 O3 -77.01(8) . . . . ?
 O2 C1 Ru1 O4 -25.93(10) . . . . ?
 O2 C1 Ru1 P1 -164.37(6) . . . . ?
 O2 C1 Ru1 P2 81.59(8) . . . . ?
 O3 C8 C9 C10 1.1(2) . . . . ?
 O3 C8 C9 C14 -175.68(15) . . . . ?
 O3 C8 O4 Ru1 -0.04(13) . . . . ?
 O3 C8 Ru1 C1 -46.31(9) . . . . ?
 O3 C8 Ru1 O1 -17.08(10) . . . . ?
 O3 C8 Ru1 O2 -71.08(8) . . . . ?
 O3 C8 Ru1 O4 179.96(13) . . . . ?
 O3 C8 Ru1 P1 85.77(8) . . . . ?
 O3 C8 Ru1 P2 -167.68(6) . . . . ?
 O4 C8 C9 C10 179.04(13) . . . . ?
 O4 C8 C9 C14 2.3(2) . . . . ?
 O4 C8 O3 Ru1 0.04(13) . . . . ?
 O4 C8 Ru1 C1 133.73(8) . . . . ?
 O4 C8 Ru1 O1 162.97(7) . . . . ?
 O4 C8 Ru1 O2 108.96(8) . . . . ?
 O4 C8 Ru1 O3 -179.96(13) . . . . ?
 O4 C8 Ru1 P1 -94.19(8) . . . . ?
 O4 C8 Ru1 P2 12.37(10) . . . . ?
 P1 C15 C16 C17 171.20(12) . . . . ?
 P1 C15 C20 C19 -170.98(12) . . . . ?
 P1 C21 C22 C23 -178.12(11) . . . . ?
 P1 C21 C26 C25 179.35(15) . . . . ?
 P1 C27 C28 C29 -170.03(12) . . . . ?
 P1 C27 C32 C31 171.22(12) . . . . ?
 P2 C33 C34 C35 -178.98(12) . . . . ?
 P2 C33 C38 C37 178.64(12) . . . . ?
 P2 C39 C40 C41 179.28(12) . . . . ?
 P2 C39 C44 C43 178.99(13) . . . . ?
 P2 C45 C46 C47 -175.82(12) . . . . ?
 P2 C45 C50 C49 175.47(13) . . . . ?
 Ru1 C1 C2 C3 55.1(5) . . . . ?
 Ru1 C1 C2 C7 -121.8(4) . . . . ?

loop_
  _exptl_crystal_face_index_h
  _exptl_crystal_face_index_k
  _exptl_crystal_face_index_l
  _exptl_crystal_face_perp_dist
  _exptl_oxdiff_crystal_face_indexfrac_h
  _exptl_oxdiff_crystal_face_indexfrac_k
  _exptl_oxdiff_crystal_face_indexfrac_l
  _exptl_oxdiff_crystal_face_x
  _exptl_oxdiff_crystal_face_y
  _exptl_oxdiff_crystal_face_z
 0 0 -1 0.0311 0.0000 -0.0000 -1.0000 0.0423 0.0147 0.0079
 0 0 1 0.0371 0.0000 0.0000 1.0000 -0.0423 -0.0147 -0.0079
 1 0 1 0.1587 1.0000 0.0000 1.0000 -0.0105 -0.0098 -0.0729
 -1 0 -1 0.1587 -1.0000 -0.0000 -1.0000 0.0105 0.0098 0.0729
 0 -1 0 0.0942 -0.0000 -1.0000 -0.0000 -0.0153 0.0509 -0.0271
 0 1 0 0.0942 0.0000 1.0000 0.0000 0.0153 -0.0509 0.0271
 -1 -1 0 0.1444 -1.0000 -1.0000 0.0000 -0.0471 0.0460 0.0379
 1 1 0 0.1504 1.0000 1.0000 0.0000 0.0471 -0.0460 -0.0379
 -2 -3 -1 0.1330 -2.0000 -3.0000 -1.0000 -0.0671 0.1576 0.0567
 1 3 2 0.1000 1.0000 3.0000 2.0000 -0.0069 -0.1772 0.0004
 1 4 -2 0.0883 1.0000 4.0000 -2.0000 0.1775 -0.1692 0.0592
 0 -1 -1 0.0788 0.0000 -1.0000 -1.0000 0.0270 0.0656 -0.0191
 -1 2 0 0.1188 -1.0000 2.0000 0.0000 -0.0012 -0.1067 0.1191
#end
data_Compound5aiPr
_audit_creation_date              2011-10-06
_audit_creation_method
;
  Olex2 1.1
  (compiled 2011.09.07 svn.r1971, GUI svn.r3853)
;
_publ_contact_author_address      ?
_publ_contact_author_email        ?
_publ_contact_author_name         ''
_publ_contact_author_phone        ?
_chemical_name_common             ?
_chemical_name_systematic
;
 ? 
;
_chemical_formula_moiety          'C30 H54 O4 P2 Ru'
_chemical_formula_sum             'C30 H54 O4 P2 Ru'
_chemical_formula_weight          641.74
_chemical_melting_point           ?
_chemical_oxdiff_formula          C30H54O2P2Ru
_chemical_oxdiff_usercomment      'Lizzies ejs39-1'
loop_
  _atom_type_symbol
  _atom_type_description
  _atom_type_scat_dispersion_real
  _atom_type_scat_dispersion_imag
  _atom_type_scat_source
 'C' 'C' 0.0033 0.0016 'International Tables Vol C Tables 4.2.6.8 and 6.1.1.4'
 'H' 'H' 0.0000 0.0000 'International Tables Vol C Tables 4.2.6.8 and 6.1.1.4'
 'O' 'O' 0.0106 0.0060 'International Tables Vol C Tables 4.2.6.8 and 6.1.1.4'
 'P' 'P' 0.1023 0.0942 'International Tables Vol C Tables 4.2.6.8 and 6.1.1.4'
 'Ru' 'Ru' -1.2594 0.8363
 'International Tables Vol C Tables 4.2.6.8 and 6.1.1.4'

_space_group_crystal_system       'monoclinic'
_space_group_IT_number            14
_space_group_name_H-M_alt         'P 1 21/n 1'
_space_group_name_Hall            '-P 2yn'
loop_
  _space_group_symop_id
  _space_group_symop_operation_xyz
 1 'x, y, z'
 2 '-x+1/2, y+1/2, -z+1/2'
 3 '-x, -y, -z'
 4 'x-1/2, -y-1/2, z-1/2'

_cell_length_a                    12.6749(7)
_cell_length_b                    14.7788(6)
_cell_length_c                    17.0117(7)
_cell_angle_alpha                 90.00
_cell_angle_beta                  90.298(4)
_cell_angle_gamma                 90.00
_cell_volume                      3186.6(3)
_cell_formula_units_Z             4
_cell_measurement_reflns_used     10454
_cell_measurement_temperature     110.00(10)
_cell_measurement_theta_max       32.0012
_cell_measurement_theta_min       2.8713
_exptl_absorpt_coefficient_mu     0.624
_exptl_absorpt_correction_T_max   0.955
_exptl_absorpt_correction_T_min   0.904
_exptl_absorpt_correction_type    analytical
_exptl_absorpt_process_details
;
CrysAlisPro, Agilent Technologies,
Version 1.171.35.15 (release 03-08-2011 CrysAlis171 .NET)
(compiled Aug  3 2011,13:03:54)
Analytical numeric absorption correction using a multifaceted crystal
			model based on expressions derived by R.C. Clark & J.S. Reid.
(Clark, R. C. & Reid, J. S. (1995). Acta Cryst. A51, 887-897)
;
_exptl_crystal_colour             brown
_exptl_crystal_colour_primary     brown
_exptl_crystal_density_diffrn     1.338
_exptl_crystal_density_meas       ?
_exptl_crystal_density_method     'not measured'
_exptl_crystal_description        block
_exptl_crystal_F_000              1360
_exptl_crystal_size_max           0.1995
_exptl_crystal_size_mid           0.1591
_exptl_crystal_size_min           0.0873
_exptl_special_details
;
 ? 
;
_diffrn_reflns_av_R_equivalents   0.0626
_diffrn_reflns_av_unetI/netI      0.0757
_diffrn_reflns_limit_h_max        17
_diffrn_reflns_limit_h_min        -18
_diffrn_reflns_limit_k_max        21
_diffrn_reflns_limit_k_min        -21
_diffrn_reflns_limit_l_max        24
_diffrn_reflns_limit_l_min        -21
_diffrn_reflns_number             21096
_diffrn_reflns_theta_full         25.00
_diffrn_reflns_theta_max          32.01
_diffrn_reflns_theta_min          3.19
_diffrn_ambient_temperature       110.00(10)
_diffrn_detector_area_resol_mean  16.1450
_diffrn_measured_fraction_theta_full 0.949
_diffrn_measured_fraction_theta_max 0.846
_diffrn_measurement_details
;
#__ type_ start__ end____ width___ exp.time_
  1 omega  -59.00   -1.00   1.0000   45.0000
omega____ theta____ kappa____ phi______ frames
    -      -24.9830   91.0000  119.0000 58

#__ type_ start__ end____ width___ exp.time_
  2 omega  -30.00    8.00   1.0000   45.0000
omega____ theta____ kappa____ phi______ frames
    -      -24.9830   94.0000 -142.0000 38

#__ type_ start__ end____ width___ exp.time_
  3 omega  -46.00   -3.00   1.0000   45.0000
omega____ theta____ kappa____ phi______ frames
    -       26.3892  -37.0000    0.0000 43

#__ type_ start__ end____ width___ exp.time_
  4 omega  -46.00    2.00   1.0000   45.0000
omega____ theta____ kappa____ phi______ frames
    -       26.3892  -37.0000  -90.0000 48

#__ type_ start__ end____ width___ exp.time_
  5 omega   -4.00   88.00   1.0000   45.0000
omega____ theta____ kappa____ phi______ frames
    -       26.3892   77.0000  -30.0000 92

#__ type_ start__ end____ width___ exp.time_
  6 omega  -56.00  -30.00   1.0000   45.0000
omega____ theta____ kappa____ phi______ frames
    -      -25.0110   94.0000   37.0000 26

#__ type_ start__ end____ width___ exp.time_
  7 omega    3.00   30.00   1.0000   45.0000
omega____ theta____ kappa____ phi______ frames
    -       26.4172   37.0000  -30.0000 27
;
_diffrn_measurement_device_type   'SuperNova, Single source at offset), Eos'
_diffrn_measurement_method        '\w scans'
_diffrn_orient_matrix_UB_11       -0.0238242000
_diffrn_orient_matrix_UB_12       0.0425671000
_diffrn_orient_matrix_UB_13       -0.0078175000
_diffrn_orient_matrix_UB_21       0.0453107000
_diffrn_orient_matrix_UB_22       0.0134393000
_diffrn_orient_matrix_UB_23       -0.0212585000
_diffrn_orient_matrix_UB_31       -0.0224311000
_diffrn_orient_matrix_UB_32       -0.0176671000
_diffrn_orient_matrix_UB_33       -0.0350513000
_diffrn_radiation_monochromator   mirror
_diffrn_radiation_type            'Mo K\a'
_diffrn_radiation_wavelength      0.7107
_diffrn_source                    'SuperNova (Mo) X-ray Source'
_diffrn_standards_decay_%         ?
_diffrn_standards_interval_count  ?
_diffrn_standards_interval_time   ?
_diffrn_standards_number          ?
_reflns_number_gt                 7413
_reflns_number_total              9364
_reflns_odcompleteness_completeness 97.03
_reflns_odcompleteness_iscentric  1
_reflns_odcompleteness_theta      30.01
_reflns_threshold_expression      >2sigma(I)
_computing_cell_refinement
;
CrysAlisPro, Agilent Technologies,
Version 1.171.35.15 (release 03-08-2011 CrysAlis171 .NET)
(compiled Aug  3 2011,13:03:54)
;
_computing_data_collection
;
CrysAlisPro, Agilent Technologies,
Version 1.171.35.15 (release 03-08-2011 CrysAlis171 .NET)
(compiled Aug  3 2011,13:03:54)
;
_computing_data_reduction
;
CrysAlisPro, Agilent Technologies,
Version 1.171.35.15 (release 03-08-2011 CrysAlis171 .NET)
(compiled Aug  3 2011,13:03:54)
;
_computing_molecular_graphics
;
O. V. Dolomanov, L. J. Bourhis, R. J. Gildea, J. A. K. Howard and H. Puschmann,
OLEX2: a complete structure solution, refinement and analysis program.
J. Appl. Cryst. (2009). 42, 339-341.
;
_computing_publication_material
;
O. V. Dolomanov, L. J. Bourhis, R. J. Gildea, J. A. K. Howard and H. Puschmann,
OLEX2: a complete structure solution, refinement and analysis program.
J. Appl. Cryst. (2009). 42, 339-341.
;
_computing_structure_refinement
;
XL, G.M. Sheldrick, Acta Cryst.
(2008). A64, 112-122
;
_computing_structure_solution
;
XS, G.M. Sheldrick, Acta Cryst.
(2008). A64, 112-122
;
_refine_diff_density_max          1.452
_refine_diff_density_min          -0.857
_refine_diff_density_rms          0.120
_refine_ls_extinction_coef        ?
_refine_ls_extinction_method      none
_refine_ls_goodness_of_fit_ref    1.082
_refine_ls_hydrogen_treatment     constr
_refine_ls_matrix_type            full
_refine_ls_number_parameters      436
_refine_ls_number_reflns          9364
_refine_ls_number_restraints      428
_refine_ls_R_factor_all           0.0820
_refine_ls_R_factor_gt            0.0652
_refine_ls_restrained_S_all       1.095
_refine_ls_shift/su_max           0.000
_refine_ls_shift/su_mean          0.000
_refine_ls_structure_factor_coef  Fsqd
_refine_ls_weighting_details
'calc w=1/[\s^2^(Fo^2^)+(0.0632P)^2^+7.0036P] where P=(Fo^2^+2Fc^2^)/3'
_refine_ls_weighting_scheme       calc
_refine_ls_wR_factor_gt           0.1626
_refine_ls_wR_factor_ref          0.1756
_refine_special_details
;

 All component atoms of the structure were modelled as disordered over
 two positions in 75:25 ratio with the exception of the Ru atom and 
 bidentate carboxylate ligand.

 All Ru-P bond lengths were constrained to be approximately equal.

 Ru-O bond lengths between metal and monodentate carboxylate ligand
 constrained to be approximately equal.

 All P-C bonds in phosphine ligands constrained to be approximately
 equal.

 All distances between carbon atoms of CH3 groups on iPr fragments
 constrained to be approximately equal.

 All bond lengths about phenyl vinylidene moiety constrained to 
 be approximately equal between disordered fragments.

 All bond lengths about monodentate carboylate moiety constrained to 
 be approximately equal between disordered fragments.

 Atoms C28 C30 C28a C30a modelled isotropically.

 All ADP for atoms restrained to be equal between disordered
 fragments with the exception of some carbon atoms on triisopropyl-
 phosphine ligands.

 

 Refinement of F^2^ against ALL reflections.  The weighted R-factor wR and 
 goodness of fit S are based on F^2^, conventional R-factors R are based 
 on F, with F set to zero for negative F^2^. The threshold expression of 
 F^2^ > 2sigma(F^2^) is used only for calculating R-factors(gt) etc. and is 
 not relevant to the choice of reflections for refinement.  R-factors based 
 on F^2^ are statistically about twice as large as those based on F, and R- 
 factors based on ALL data will be even larger. 
;
_atom_sites_solution_hydrogens    geom
_atom_sites_solution_primary      direct
_atom_sites_solution_secondary    difmap
loop_
  _atom_site_label
  _atom_site_type_symbol
  _atom_site_fract_x
  _atom_site_fract_y
  _atom_site_fract_z
  _atom_site_U_iso_or_equiv
  _atom_site_adp_type
  _atom_site_occupancy
  _atom_site_symmetry_multiplicity
  _atom_site_calc_flag
  _atom_site_refinement_flags
  _atom_site_disorder_assembly
  _atom_site_disorder_group
 C1 C 0.2501(3) 0.0968(3) -0.0652(2) 0.0261(8) Uani 1 1 d . A .
 C2 C 0.2428(5) 0.0287(4) -0.1311(3) 0.0443(12) Uani 1 1 d . . .
 H2A H 0.2569 -0.0320 -0.1104 0.066 Uiso 1 1 calc R . .
 H2B H 0.2949 0.0435 -0.1715 0.066 Uiso 1 1 calc R . .
 H2C H 0.1718 0.0305 -0.1542 0.066 Uiso 1 1 calc R . .
 C3 C 0.3737(5) 0.3341(4) 0.1559(4) 0.0357(12) Uani 0.746(2) 1 d PD A 1
 C3A C 0.1343(12) 0.3312(12) 0.1585(10) 0.0357(12) Uani 0.254(2) 1 d PD A 2
 C4 C 0.4822(6) 0.3633(8) 0.1830(7) 0.085(4) Uani 0.746(2) 1 d PD A 1
 H4A H 0.5341 0.3174 0.1678 0.127 Uiso 0.746(2) 1 calc PR A 1
 H4B H 0.4827 0.3701 0.2403 0.127 Uiso 0.746(2) 1 calc PR A 1
 H4C H 0.5002 0.4212 0.1584 0.127 Uiso 0.746(2) 1 calc PR A 1
 C4A C 0.0299(17) 0.368(2) 0.188(2) 0.080(10) Uani 0.254(2) 1 d PD A 2
 H4AA H -0.0226 0.3641 0.1452 0.120 Uiso 0.254(2) 1 calc PR A 2
 H4AB H 0.0386 0.4306 0.2040 0.120 Uiso 0.254(2) 1 calc PR A 2
 H4AC H 0.0062 0.3313 0.2323 0.120 Uiso 0.254(2) 1 calc PR A 2
 C5 C 0.1473(6) 0.2688(5) 0.0959(5) 0.0249(13) Uani 0.746(2) 1 d PD A 1
 C5A C 0.360(2) 0.267(2) 0.091(2) 0.0249(13) Uani 0.254(2) 1 d PD A 2
 C6 C 0.0672(4) 0.3119(4) 0.1310(3) 0.0283(10) Uani 0.746(2) 1 d PD A 1
 H6 H 0.0859 0.3555 0.1697 0.034 Uiso 0.746(2) 1 calc PR A 1
 C6A C 0.4387(11) 0.3093(11) 0.1294(10) 0.0283(10) Uani 0.254(2) 1 d PD A 2
 H6A H 0.4197 0.3508 0.1695 0.034 Uiso 0.254(2) 1 calc PR A 2
 C7 C -0.0464(4) 0.2994(4) 0.1165(3) 0.0284(10) Uani 0.746(2) 1 d PD A 1
 C7A C 0.5517(11) 0.2972(10) 0.1145(9) 0.0284(10) Uani 0.254(2) 1 d PD A 2
 C8 C -0.0842(5) 0.2424(5) 0.0580(4) 0.0415(14) Uani 0.746(2) 1 d PD A 1
 H8 H -0.0366 0.2093 0.0261 0.050 Uiso 0.746(2) 1 calc PR A 1
 C8A C 0.5942(14) 0.2455(14) 0.0558(11) 0.0415(14) Uani 0.254(2) 1 d PD A 2
 H8A H 0.5483 0.2156 0.0200 0.050 Uiso 0.254(2) 1 calc PR A 2
 C9 C -0.1931(6) 0.2343(6) 0.0467(5) 0.0512(18) Uani 0.746(2) 1 d PD A 1
 H9 H -0.2186 0.1973 0.0051 0.061 Uiso 0.746(2) 1 calc PR A 1
 C9A C 0.7043(15) 0.2354(17) 0.0469(13) 0.0512(18) Uani 0.254(2) 1 d PD A 2
 H9A H 0.7316 0.1982 0.0062 0.061 Uiso 0.254(2) 1 calc PR A 2
 C10 C -0.2632(6) 0.2774(8) 0.0930(6) 0.0475(18) Uani 0.746(2) 1 d PD A 1
 H10 H -0.3368 0.2682 0.0859 0.057 Uiso 0.746(2) 1 calc PR A 1
 C10A C 0.7710(19) 0.279(3) 0.0968(19) 0.0475(18) Uani 0.254(2) 1 d PD A 2
 H10A H 0.8450 0.2728 0.0903 0.057 Uiso 0.254(2) 1 calc PR A 2
 C11 C -0.2269(5) 0.3349(6) 0.1507(5) 0.0429(16) Uani 0.746(2) 1 d PD A 1
 H11 H -0.2753 0.3672 0.1825 0.051 Uiso 0.746(2) 1 calc PR A 1
 C11A C 0.7326(14) 0.333(2) 0.1570(16) 0.0429(16) Uani 0.254(2) 1 d PD A 2
 H11A H 0.7788 0.3637 0.1919 0.051 Uiso 0.254(2) 1 calc PR A 2
 C12 C -0.1180(5) 0.3455(4) 0.1621(4) 0.0366(13) Uani 0.746(2) 1 d PD A 1
 H12 H -0.0931 0.3851 0.2021 0.044 Uiso 0.746(2) 1 calc PR A 1
 C12A C 0.6230(12) 0.3393(13) 0.1645(11) 0.0366(13) Uani 0.254(2) 1 d PD A 2
 H12A H 0.5959 0.3749 0.2063 0.044 Uiso 0.254(2) 1 calc PR A 2
 C13 C 0.3805(8) -0.0780(6) 0.1466(7) 0.082(3) Uiso 0.746(2) 1 d PD A 1
 H13A H 0.4042 -0.0681 0.2009 0.123 Uiso 0.746(2) 1 calc PR A 1
 H13B H 0.4319 -0.1158 0.1191 0.123 Uiso 0.746(2) 1 calc PR A 1
 H13C H 0.3118 -0.1085 0.1468 0.123 Uiso 0.746(2) 1 calc PR A 1
 C13A C 0.361(2) -0.0460(19) 0.0885(17) 0.082(3) Uiso 0.254(2) 1 d PD A 2
 H13D H 0.2963 -0.0807 0.0812 0.123 Uiso 0.254(2) 1 calc PR A 2
 H13E H 0.4194 -0.0873 0.1019 0.123 Uiso 0.254(2) 1 calc PR A 2
 H13F H 0.3782 -0.0139 0.0397 0.123 Uiso 0.254(2) 1 calc PR A 2
 C14 C 0.3703(5) 0.0130(4) 0.1047(4) 0.0433(15) Uani 0.746(2) 1 d PD A 1
 H14 H 0.3493 -0.0019 0.0494 0.052 Uiso 0.746(2) 1 calc PR A 1
 C14A C 0.3467(10) 0.0225(11) 0.1551(10) 0.0433(15) Uani 0.254(2) 1 d PD A 2
 H14A H 0.3369 -0.0121 0.2050 0.052 Uiso 0.254(2) 1 calc PR A 2
 C15 C 0.4774(6) 0.0584(5) 0.0988(5) 0.0569(19) Uiso 0.746(2) 1 d PD A 1
 H15A H 0.4712 0.1131 0.0666 0.085 Uiso 0.746(2) 1 calc PR A 1
 H15B H 0.5276 0.0167 0.0743 0.085 Uiso 0.746(2) 1 calc PR A 1
 H15C H 0.5025 0.0746 0.1515 0.085 Uiso 0.746(2) 1 calc PR A 1
 C15A C 0.4483(16) 0.0780(16) 0.1633(15) 0.0569(19) Uiso 0.254(2) 1 d PD A 2
 H15D H 0.4698 0.1000 0.1114 0.085 Uiso 0.254(2) 1 calc PR A 2
 H15E H 0.5042 0.0398 0.1854 0.085 Uiso 0.254(2) 1 calc PR A 2
 H15F H 0.4358 0.1296 0.1982 0.085 Uiso 0.254(2) 1 calc PR A 2
 C16 C 0.3594(6) 0.0580(5) 0.2929(4) 0.0507(18) Uani 0.746(2) 1 d PD A 1
 H16A H 0.3046 0.0123 0.3015 0.076 Uiso 0.746(2) 1 calc PR A 1
 H16B H 0.3802 0.0845 0.3435 0.076 Uiso 0.746(2) 1 calc PR A 1
 H16C H 0.4208 0.0296 0.2684 0.076 Uiso 0.746(2) 1 calc PR A 1
 C16A C 0.117(2) -0.0791(14) 0.1493(18) 0.080(9) Uiso 0.254(2) 1 d PD A 2
 H16D H 0.1794 -0.0889 0.1822 0.120 Uiso 0.254(2) 1 calc PR A 2
 H16E H 0.1101 -0.1285 0.1112 0.120 Uiso 0.254(2) 1 calc PR A 2
 H16F H 0.0538 -0.0776 0.1826 0.120 Uiso 0.254(2) 1 calc PR A 2
 C17 C 0.3164(5) 0.1323(4) 0.2390(3) 0.0376(13) Uani 0.746(2) 1 d PD A 1
 H17 H 0.3757 0.1756 0.2298 0.045 Uiso 0.746(2) 1 calc PR A 1
 C17A C 0.1272(10) 0.0108(8) 0.1057(10) 0.0334(12) Uani 0.254(2) 1 d PD A 2
 H17A H 0.1479 -0.0056 0.0509 0.040 Uiso 0.254(2) 1 calc PR A 2
 C18 C 0.2305(7) 0.1846(7) 0.2835(5) 0.062(3) Uani 0.746(2) 1 d PD A 1
 H18A H 0.1962 0.2276 0.2478 0.093 Uiso 0.746(2) 1 calc PR A 1
 H18B H 0.2627 0.2176 0.3275 0.093 Uiso 0.746(2) 1 calc PR A 1
 H18C H 0.1780 0.1420 0.3037 0.093 Uiso 0.746(2) 1 calc PR A 1
 C18A C 0.0194(14) 0.0552(14) 0.0981(14) 0.052(5) Uiso 0.254(2) 1 d PD A 2
 H18D H 0.0039 0.0890 0.1463 0.078 Uiso 0.254(2) 1 calc PR A 2
 H18E H -0.0345 0.0086 0.0900 0.078 Uiso 0.254(2) 1 calc PR A 2
 H18F H 0.0193 0.0968 0.0532 0.078 Uiso 0.254(2) 1 calc PR A 2
 C19 C 0.0528(7) 0.0773(7) 0.1731(6) 0.075(3) Uiso 0.746(2) 1 d PD A 1
 H19A H 0.0662 0.1223 0.2143 0.112 Uiso 0.746(2) 1 calc PR A 1
 H19B H -0.0038 0.0365 0.1899 0.112 Uiso 0.746(2) 1 calc PR A 1
 H19C H 0.0317 0.1080 0.1245 0.112 Uiso 0.746(2) 1 calc PR A 1
 C19A C 0.1365(19) 0.0587(14) 0.2928(11) 0.062(3) Uani 0.254(2) 1 d PD A 2
 H19D H 0.0698 0.0371 0.2703 0.093 Uiso 0.254(2) 1 calc PR A 2
 H19E H 0.1234 0.0850 0.3448 0.093 Uiso 0.254(2) 1 calc PR A 2
 H19F H 0.1857 0.0080 0.2980 0.093 Uiso 0.254(2) 1 calc PR A 2
 C20 C 0.1533(4) 0.0225(4) 0.1586(3) 0.0334(12) Uani 0.746(2) 1 d PD A 1
 H20 H 0.1680 -0.0144 0.2067 0.040 Uiso 0.746(2) 1 calc PR A 1
 C20A C 0.1840(13) 0.1308(11) 0.2389(6) 0.0376(13) Uani 0.254(2) 1 d PD A 2
 H20A H 0.1254 0.1747 0.2288 0.045 Uiso 0.254(2) 1 calc PR A 2
 C21 C 0.1320(9) -0.0428(7) 0.0904(6) 0.085(3) Uiso 0.746(2) 1 d PD A 1
 H21A H 0.1333 -0.0094 0.0407 0.128 Uiso 0.746(2) 1 calc PR A 1
 H21B H 0.0625 -0.0708 0.0972 0.128 Uiso 0.746(2) 1 calc PR A 1
 H21C H 0.1864 -0.0899 0.0899 0.128 Uiso 0.746(2) 1 calc PR A 1
 C21A C 0.267(2) 0.1843(19) 0.2851(16) 0.0507(18) Uani 0.254(2) 1 d PD A 2
 H21D H 0.3267 0.1449 0.2975 0.076 Uiso 0.254(2) 1 calc PR A 2
 H21E H 0.2356 0.2067 0.3340 0.076 Uiso 0.254(2) 1 calc PR A 2
 H21F H 0.2909 0.2355 0.2534 0.076 Uiso 0.254(2) 1 calc PR A 2
 C22 C 0.1834(8) 0.3808(7) -0.2092(5) 0.066(3) Uani 0.655(4) 1 d PD A 1
 H22A H 0.1442 0.4344 -0.1919 0.099 Uiso 0.655(4) 1 calc PR A 1
 H22B H 0.1516 0.3571 -0.2576 0.099 Uiso 0.655(4) 1 calc PR A 1
 H22C H 0.2570 0.3974 -0.2190 0.099 Uiso 0.655(4) 1 calc PR A 1
 C22A C 0.0786(18) 0.2611(12) -0.1674(8) 0.066(3) Uani 0.345(4) 1 d PD A 2
 H22D H 0.1383 0.2655 -0.2035 0.099 Uiso 0.345(4) 1 calc PR A 2
 H22E H 0.0131 0.2751 -0.1956 0.099 Uiso 0.345(4) 1 calc PR A 2
 H22F H 0.0748 0.1995 -0.1461 0.099 Uiso 0.345(4) 1 calc PR A 2
 C23 C 0.1793(5) 0.3081(5) -0.1449(4) 0.0444(17) Uani 0.655(4) 1 d PD A 1
 H23 H 0.2077 0.2518 -0.1696 0.053 Uiso 0.655(4) 1 calc PR A 1
 C23A C 0.0939(7) 0.3288(10) -0.0995(7) 0.0444(17) Uani 0.345(4) 1 d PD A 2
 H23A H 0.0793 0.3906 -0.1208 0.053 Uiso 0.345(4) 1 calc PR A 2
 C24 C 0.0646(6) 0.2871(8) -0.1252(6) 0.067(3) Uani 0.655(4) 1 d PD A 1
 H24A H 0.0618 0.2358 -0.0887 0.100 Uiso 0.655(4) 1 calc PR A 1
 H24B H 0.0261 0.2719 -0.1735 0.100 Uiso 0.655(4) 1 calc PR A 1
 H24C H 0.0322 0.3402 -0.1006 0.100 Uiso 0.655(4) 1 calc PR A 1
 C24A C 0.0082(11) 0.3078(14) -0.0384(8) 0.067(3) Uani 0.345(4) 1 d PD A 2
 H24D H 0.0258 0.2515 -0.0108 0.100 Uiso 0.345(4) 1 calc PR A 2
 H24E H -0.0601 0.3010 -0.0651 0.100 Uiso 0.345(4) 1 calc PR A 2
 H24F H 0.0041 0.3575 -0.0004 0.100 Uiso 0.345(4) 1 calc PR A 2
 C25 C 0.4117(8) 0.2672(6) -0.1735(5) 0.063(2) Uani 0.655(4) 1 d PD A 1
 H25A H 0.3984 0.2051 -0.1558 0.094 Uiso 0.655(4) 1 calc PR A 1
 H25B H 0.4834 0.2714 -0.1945 0.094 Uiso 0.655(4) 1 calc PR A 1
 H25C H 0.3607 0.2834 -0.2146 0.094 Uiso 0.655(4) 1 calc PR A 1
 C25A C 0.3051(13) 0.3760(12) -0.2119(10) 0.063(2) Uani 0.345(4) 1 d PD A 2
 H25D H 0.2306 0.3859 -0.2252 0.094 Uiso 0.345(4) 1 calc PR A 2
 H25E H 0.3424 0.3537 -0.2583 0.094 Uiso 0.345(4) 1 calc PR A 2
 H25F H 0.3368 0.4332 -0.1946 0.094 Uiso 0.345(4) 1 calc PR A 2
 C26 C 0.4002(5) 0.3331(5) -0.1029(4) 0.0411(15) Uani 0.655(4) 1 d PD A 1
 H26 H 0.4125 0.3958 -0.1230 0.049 Uiso 0.655(4) 1 calc PR A 1
 C26A C 0.3135(9) 0.3061(9) -0.1457(6) 0.0411(15) Uani 0.345(4) 1 d PD A 2
 H26A H 0.2863 0.2481 -0.1682 0.049 Uiso 0.345(4) 1 calc PR A 2
 C27 C 0.4913(6) 0.3103(7) -0.0467(5) 0.059(2) Uani 0.655(4) 1 d PD A 1
 H27A H 0.4847 0.3463 0.0014 0.088 Uiso 0.655(4) 1 calc PR A 1
 H27B H 0.5586 0.3241 -0.0722 0.088 Uiso 0.655(4) 1 calc PR A 1
 H27C H 0.4888 0.2458 -0.0334 0.088 Uiso 0.655(4) 1 calc PR A 1
 C27A C 0.4308(10) 0.2897(15) -0.1275(12) 0.059(2) Uani 0.345(4) 1 d PD A 2
 H27D H 0.4647 0.3472 -0.1137 0.088 Uiso 0.345(4) 1 calc PR A 2
 H27E H 0.4652 0.2641 -0.1739 0.088 Uiso 0.345(4) 1 calc PR A 2
 H27F H 0.4375 0.2475 -0.0834 0.088 Uiso 0.345(4) 1 calc PR A 2
 C28 C 0.3286(8) 0.4903(9) 0.0197(7) 0.075(2) Uiso 0.655(4) 1 d PD A 1
 H28A H 0.3179 0.4652 0.0724 0.113 Uiso 0.655(4) 1 calc PR A 1
 H28B H 0.3217 0.5563 0.0216 0.113 Uiso 0.655(4) 1 calc PR A 1
 H28C H 0.3992 0.4742 0.0011 0.113 Uiso 0.655(4) 1 calc PR A 1
 C28A C 0.1738(14) 0.4892(18) 0.0200(13) 0.075(2) Uiso 0.345(4) 1 d PD A 2
 H28D H 0.1935 0.4653 0.0717 0.113 Uiso 0.345(4) 1 calc PR A 2
 H28E H 0.1017 0.4703 0.0069 0.113 Uiso 0.345(4) 1 calc PR A 2
 H28F H 0.1774 0.5555 0.0210 0.113 Uiso 0.345(4) 1 calc PR A 2
 C29 C 0.2461(9) 0.4517(4) -0.0364(7) 0.0589(19) Uani 0.655(4) 1 d PD A 1
 H29 H 0.2587 0.4835 -0.0873 0.071 Uiso 0.655(4) 1 calc PR A 1
 C29A C 0.2495(15) 0.4530(5) -0.0417(13) 0.0589(19) Uani 0.345(4) 1 d PD A 2
 H29A H 0.2318 0.4840 -0.0923 0.071 Uiso 0.345(4) 1 calc PR A 2
 C30 C 0.1368(7) 0.4810(9) -0.0119(7) 0.075(2) Uiso 0.655(4) 1 d PD A 1
 H30A H 0.0851 0.4601 -0.0509 0.113 Uiso 0.655(4) 1 calc PR A 1
 H30B H 0.1342 0.5471 -0.0084 0.113 Uiso 0.655(4) 1 calc PR A 1
 H30C H 0.1202 0.4547 0.0395 0.113 Uiso 0.655(4) 1 calc PR A 1
 C30A C 0.3617(13) 0.4815(18) -0.0192(14) 0.075(2) Uiso 0.345(4) 1 d PD A 2
 H30D H 0.3689 0.5472 -0.0253 0.113 Uiso 0.345(4) 1 calc PR A 2
 H30E H 0.4123 0.4509 -0.0535 0.113 Uiso 0.345(4) 1 calc PR A 2
 H30F H 0.3759 0.4648 0.0356 0.113 Uiso 0.345(4) 1 calc PR A 2
 O1 O 0.3375(2) 0.1257(2) -0.04150(18) 0.0309(6) Uani 1 1 d . A .
 O2 O 0.1659(2) 0.1270(2) -0.03430(19) 0.0323(7) Uani 1 1 d . A .
 O3 O 0.3751(6) 0.2762(5) 0.0996(5) 0.0367(12) Uani 0.746(2) 1 d PD A 1
 O3A O 0.1304(16) 0.2796(16) 0.1003(13) 0.0367(12) Uani 0.254(2) 1 d PD A 2
 O4 O 0.2956(4) 0.3653(4) 0.1868(3) 0.0453(11) Uani 0.746(2) 1 d PD A 1
 O4A O 0.2147(11) 0.3680(11) 0.1851(8) 0.0453(11) Uani 0.254(2) 1 d PD A 2
 P1 P 0.26949(13) 0.09440(10) 0.14025(9) 0.0223(3) Uani 0.746(2) 1 d PD A 1
 P1A P 0.2279(4) 0.0937(3) 0.1398(3) 0.0223(3) Uani 0.254(2) 1 d PD A 2
 P2 P 0.2656(2) 0.33058(15) -0.05892(16) 0.0269(5) Uani 0.655(4) 1 d PD A 1
 P2A P 0.2311(4) 0.3298(3) -0.0580(3) 0.0269(5) Uani 0.345(4) 1 d PD A 2
 Ru1 Ru 0.25164(2) 0.21532(2) 0.044247(17) 0.01992(10) Uani 1 1 d D . .

loop_
  _atom_site_aniso_label
  _atom_site_aniso_U_11
  _atom_site_aniso_U_22
  _atom_site_aniso_U_33
  _atom_site_aniso_U_23
  _atom_site_aniso_U_13
  _atom_site_aniso_U_12
 C1 0.042(2) 0.0187(16) 0.0173(16) -0.0005(14) -0.0032(15) 0.0040(16)
 C2 0.061(3) 0.039(3) 0.032(2) -0.018(2) -0.004(2) 0.002(2)
 C3 0.034(3) 0.034(3) 0.038(3) -0.011(3) -0.003(2) -0.003(2)
 C3A 0.034(3) 0.034(3) 0.038(3) -0.011(3) -0.003(2) -0.003(2)
 C4 0.042(4) 0.104(8) 0.107(8) -0.066(7) -0.014(5) -0.015(5)
 C4A 0.049(13) 0.073(19) 0.12(3) -0.047(19) 0.028(15) -0.005(13)
 C5 0.027(3) 0.016(3) 0.032(3) -0.002(2) -0.002(2) 0.006(2)
 C5A 0.027(3) 0.016(3) 0.032(3) -0.002(2) -0.002(2) 0.006(2)
 C6 0.035(2) 0.022(2) 0.028(3) -0.005(2) 0.007(2) 0.004(2)
 C6A 0.035(2) 0.022(2) 0.028(3) -0.005(2) 0.007(2) 0.004(2)
 C7 0.032(2) 0.024(2) 0.030(3) 0.001(2) 0.003(2) 0.001(2)
 C7A 0.032(2) 0.024(2) 0.030(3) 0.001(2) 0.003(2) 0.001(2)
 C8 0.043(3) 0.043(3) 0.038(3) -0.016(3) 0.003(3) -0.001(3)
 C8A 0.043(3) 0.043(3) 0.038(3) -0.016(3) 0.003(3) -0.001(3)
 C9 0.052(4) 0.057(4) 0.044(4) -0.016(3) -0.004(3) -0.003(4)
 C9A 0.052(4) 0.057(4) 0.044(4) -0.016(3) -0.004(3) -0.003(4)
 C10 0.035(4) 0.055(4) 0.052(4) 0.003(3) -0.006(4) -0.004(5)
 C10A 0.035(4) 0.055(4) 0.052(4) 0.003(3) -0.006(4) -0.004(5)
 C11 0.035(4) 0.046(3) 0.048(4) -0.003(3) 0.007(4) 0.010(4)
 C11A 0.035(4) 0.046(3) 0.048(4) -0.003(3) 0.007(4) 0.010(4)
 C12 0.033(3) 0.033(3) 0.045(3) -0.010(3) 0.003(2) 0.003(2)
 C12A 0.033(3) 0.033(3) 0.045(3) -0.010(3) 0.003(2) 0.003(2)
 C14 0.053(4) 0.047(4) 0.030(3) 0.009(3) 0.005(3) 0.026(3)
 C14A 0.053(4) 0.047(4) 0.030(3) 0.009(3) 0.005(3) 0.026(3)
 C16 0.059(4) 0.059(4) 0.034(3) 0.007(3) -0.016(3) -0.002(4)
 C17 0.047(3) 0.041(3) 0.025(3) 0.001(2) -0.003(2) -0.011(3)
 C17A 0.042(3) 0.027(2) 0.032(3) 0.005(2) 0.001(2) -0.004(2)
 C18 0.084(7) 0.072(6) 0.029(3) -0.014(4) 0.000(4) 0.019(5)
 C19A 0.084(7) 0.072(6) 0.029(3) -0.014(4) 0.000(4) 0.019(5)
 C20 0.042(3) 0.027(2) 0.032(3) 0.005(2) 0.001(2) -0.004(2)
 C20A 0.047(3) 0.041(3) 0.025(3) 0.001(2) -0.003(2) -0.011(3)
 C21A 0.059(4) 0.059(4) 0.034(3) 0.007(3) -0.016(3) -0.002(4)
 C22 0.098(7) 0.060(5) 0.040(4) 0.023(4) -0.014(5) -0.006(5)
 C22A 0.098(7) 0.060(5) 0.040(4) 0.023(4) -0.014(5) -0.006(5)
 C23 0.046(4) 0.055(4) 0.032(3) 0.022(3) -0.010(3) 0.005(3)
 C23A 0.046(4) 0.055(4) 0.032(3) 0.022(3) -0.010(3) 0.005(3)
 C24 0.043(4) 0.092(8) 0.064(6) 0.021(6) -0.019(4) 0.006(5)
 C24A 0.043(4) 0.092(8) 0.064(6) 0.021(6) -0.019(4) 0.006(5)
 C25 0.067(5) 0.044(4) 0.079(6) 0.006(4) 0.041(5) 0.000(4)
 C25A 0.067(5) 0.044(4) 0.079(6) 0.006(4) 0.041(5) 0.000(4)
 C26 0.043(3) 0.042(4) 0.038(3) 0.015(3) 0.012(3) -0.002(3)
 C26A 0.043(3) 0.042(4) 0.038(3) 0.015(3) 0.012(3) -0.002(3)
 C27 0.044(4) 0.065(6) 0.067(6) 0.013(5) 0.014(4) -0.005(4)
 C27A 0.044(4) 0.065(6) 0.067(6) 0.013(5) 0.014(4) -0.005(4)
 C29 0.111(6) 0.027(2) 0.039(3) 0.004(2) 0.004(3) 0.012(3)
 C29A 0.111(6) 0.027(2) 0.039(3) 0.004(2) 0.004(3) 0.012(3)
 O1 0.0380(16) 0.0251(14) 0.0296(15) -0.0036(12) 0.0012(12) 0.0039(13)
 O2 0.0362(15) 0.0272(15) 0.0336(16) -0.0055(13) -0.0025(13) 0.0050(13)
 O3 0.034(3) 0.034(3) 0.043(3) -0.019(2) -0.002(2) -0.001(2)
 O3A 0.034(3) 0.034(3) 0.043(3) -0.019(2) -0.002(2) -0.001(2)
 O4 0.047(2) 0.051(3) 0.038(2) -0.027(2) 0.001(2) -0.004(2)
 O4A 0.047(2) 0.051(3) 0.038(2) -0.027(2) 0.001(2) -0.004(2)
 P1 0.0240(8) 0.0235(5) 0.0195(5) 0.0013(4) 0.0012(7) 0.0055(7)
 P1A 0.0240(8) 0.0235(5) 0.0195(5) 0.0013(4) 0.0012(7) 0.0055(7)
 P2 0.0371(15) 0.0206(5) 0.0232(5) 0.0028(4) 0.0075(11) 0.0023(9)
 P2A 0.0371(15) 0.0206(5) 0.0232(5) 0.0028(4) 0.0075(11) 0.0023(9)
 Ru1 0.02436(15) 0.01796(15) 0.01746(15) -0.00091(10) 0.00155(10) 0.00079(11)

_geom_special_details
;
 All esds (except the esd in the dihedral angle between two l.s. planes) 
 are estimated using the full covariance matrix.  The cell esds are taken 
 into account individually in the estimation of esds in distances, angles 
 and torsion angles; correlations between esds in cell parameters are only 
 used when they are defined by crystal symmetry.  An approximate (isotropic) 
 treatment of cell esds is used for estimating esds involving l.s. planes. 
;
loop_
  _geom_bond_atom_site_label_1
  _geom_bond_atom_site_label_2
  _geom_bond_distance
  _geom_bond_site_symmetry_2
  _geom_bond_publ_flag
 C1 C2 1.508(6) . ?
 C1 O1 1.252(5) . ?
 C1 O2 1.273(5) . ?
 C1 Ru1 2.557(4) . ?
 C2 H2A 0.9800 . ?
 C2 H2B 0.9800 . ?
 C2 H2C 0.9800 . ?
 C3 C4 1.510(9) . ?
 C3 O3 1.285(8) . ?
 C3 O4 1.214(7) . ?
 C3A C4A 1.513(18) . ?
 C3A O3A 1.251(15) . ?
 C3A O4A 1.237(13) . ?
 C4 H4A 0.9800 . ?
 C4 H4B 0.9800 . ?
 C4 H4C 0.9800 . ?
 C4A H4AA 0.9800 . ?
 C4A H4AB 0.9800 . ?
 C4A H4AC 0.9800 . ?
 C5 C6 1.342(8) . ?
 C5 Ru1 1.777(6) . ?
 C5A C6A 1.345(17) . ?
 C5A Ru1 1.757(16) . ?
 C6 H6 0.9500 . ?
 C6 C7 1.472(8) . ?
 C6A H6A 0.9500 . ?
 C6A C7A 1.466(16) . ?
 C7 C8 1.386(8) . ?
 C7 C12 1.378(8) . ?
 C7A C8A 1.369(16) . ?
 C7A C12A 1.386(16) . ?
 C8 H8 0.9500 . ?
 C8 C9 1.399(10) . ?
 C8A H8A 0.9500 . ?
 C8A C9A 1.413(18) . ?
 C9 H9 0.9500 . ?
 C9 C10 1.351(10) . ?
 C9A H9A 0.9500 . ?
 C9A C10A 1.358(18) . ?
 C10 H10 0.9500 . ?
 C10 C11 1.375(10) . ?
 C10A H10A 0.9500 . ?
 C10A C11A 1.386(18) . ?
 C11 H11 0.9500 . ?
 C11 C12 1.402(8) . ?
 C11A H11A 0.9500 . ?
 C11A C12A 1.398(17) . ?
 C12 H12 0.9500 . ?
 C12A H12A 0.9500 . ?
 C13 H13A 0.9800 . ?
 C13 H13B 0.9800 . ?
 C13 H13C 0.9800 . ?
 C13 C14 1.527(7) . ?
 C13A H13D 0.9800 . ?
 C13A H13E 0.9800 . ?
 C13A H13F 0.9800 . ?
 C13A C14A 1.532(8) . ?
 C14 H14 1.0000 . ?
 C14 C15 1.518(6) . ?
 C14 P1 1.859(5) . ?
 C14A H14A 1.0000 . ?
 C14A C15A 1.532(8) . ?
 C14A P1A 1.854(7) . ?
 C15 H15A 0.9800 . ?
 C15 H15B 0.9800 . ?
 C15 H15C 0.9800 . ?
 C15A H15D 0.9800 . ?
 C15A H15E 0.9800 . ?
 C15A H15F 0.9800 . ?
 C16 H16A 0.9800 . ?
 C16 H16B 0.9800 . ?
 C16 H16C 0.9800 . ?
 C16 C17 1.529(6) . ?
 C16A H16D 0.9800 . ?
 C16A H16E 0.9800 . ?
 C16A H16F 0.9800 . ?
 C16A C17A 1.528(8) . ?
 C17 H17 1.0000 . ?
 C17 C18 1.539(6) . ?
 C17 P1 1.865(5) . ?
 C17A H17A 1.0000 . ?
 C17A C18A 1.521(8) . ?
 C17A P1A 1.860(7) . ?
 C18 H18A 0.9800 . ?
 C18 H18B 0.9800 . ?
 C18 H18C 0.9800 . ?
 C18A H18D 0.9800 . ?
 C18A H18E 0.9800 . ?
 C18A H18F 0.9800 . ?
 C19 H19A 0.9800 . ?
 C19 H19B 0.9800 . ?
 C19 H19C 0.9800 . ?
 C19 C20 1.530(6) . ?
 C19A H19D 0.9800 . ?
 C19A H19E 0.9800 . ?
 C19A H19F 0.9800 . ?
 C19A C20A 1.531(8) . ?
 C20 H20 1.0000 . ?
 C20 C21 1.532(7) . ?
 C20 P1 1.844(5) . ?
 C20A H20A 1.0000 . ?
 C20A C21A 1.527(8) . ?
 C20A P1A 1.861(7) . ?
 C21 H21A 0.9800 . ?
 C21 H21B 0.9800 . ?
 C21 H21C 0.9800 . ?
 C21A H21D 0.9800 . ?
 C21A H21E 0.9800 . ?
 C21A H21F 0.9800 . ?
 C22 H22A 0.9800 . ?
 C22 H22B 0.9800 . ?
 C22 H22C 0.9800 . ?
 C22 C23 1.534(6) . ?
 C22A H22D 0.9800 . ?
 C22A H22E 0.9800 . ?
 C22A H22F 0.9800 . ?
 C22A C23A 1.539(8) . ?
 C23 H23 1.0000 . ?
 C23 C24 1.525(7) . ?
 C23 P2 1.852(6) . ?
 C23A H23A 1.0000 . ?
 C23A C24A 1.539(8) . ?
 C23A P2A 1.874(7) . ?
 C24 H24A 0.9800 . ?
 C24 H24B 0.9800 . ?
 C24 H24C 0.9800 . ?
 C24A H24D 0.9800 . ?
 C24A H24E 0.9800 . ?
 C24A H24F 0.9800 . ?
 C25 H25A 0.9800 . ?
 C25 H25B 0.9800 . ?
 C25 H25C 0.9800 . ?
 C25 C26 1.554(7) . ?
 C25A H25D 0.9800 . ?
 C25A H25E 0.9800 . ?
 C25A H25F 0.9800 . ?
 C25A C26A 1.532(7) . ?
 C26 H26 1.0000 . ?
 C26 C27 1.532(7) . ?
 C26 P2 1.866(6) . ?
 C26A H26A 1.0000 . ?
 C26A C27A 1.536(7) . ?
 C26A P2A 1.859(7) . ?
 C27 H27A 0.9800 . ?
 C27 H27B 0.9800 . ?
 C27 H27C 0.9800 . ?
 C27A H27D 0.9800 . ?
 C27A H27E 0.9800 . ?
 C27A H27F 0.9800 . ?
 C28 H28A 0.9800 . ?
 C28 H28B 0.9800 . ?
 C28 H28C 0.9800 . ?
 C28 C29 1.523(7) . ?
 C28A H28D 0.9800 . ?
 C28A H28E 0.9800 . ?
 C28A H28F 0.9800 . ?
 C28A C29A 1.523(8) . ?
 C29 H29 1.0000 . ?
 C29 C30 1.512(7) . ?
 C29 P2 1.847(6) . ?
 C29A H29A 1.0000 . ?
 C29A C30A 1.530(8) . ?
 C29A P2A 1.856(7) . ?
 C30 H30A 0.9800 . ?
 C30 H30B 0.9800 . ?
 C30 H30C 0.9800 . ?
 C30A H30D 0.9800 . ?
 C30A H30E 0.9800 . ?
 C30A H30F 0.9800 . ?
 O1 Ru1 2.255(3) . ?
 O2 Ru1 2.158(3) . ?
 O3 Ru1 2.032(5) . ?
 O3A Ru1 2.046(15) . ?
 P1 Ru1 2.4307(15) . ?
 P1A Ru1 2.443(5) . ?
 P2 Ru1 2.453(2) . ?
 P2A Ru1 2.439(5) . ?

loop_
  _geom_angle_atom_site_label_1
  _geom_angle_atom_site_label_2
  _geom_angle_atom_site_label_3
  _geom_angle
  _geom_angle_site_symmetry_1
  _geom_angle_site_symmetry_3
  _geom_angle_publ_flag
 C2 C1 Ru1 176.6(3) . . ?
 O1 C1 C2 121.2(4) . . ?
 O1 C1 O2 119.3(4) . . ?
 O1 C1 Ru1 61.8(2) . . ?
 O2 C1 C2 119.5(4) . . ?
 O2 C1 Ru1 57.4(2) . . ?
 C1 C2 H2A 109.5 . . ?
 C1 C2 H2B 109.5 . . ?
 C1 C2 H2C 109.5 . . ?
 H2A C2 H2B 109.5 . . ?
 H2A C2 H2C 109.5 . . ?
 H2B C2 H2C 109.5 . . ?
 O3 C3 C4 113.7(6) . . ?
 O4 C3 C4 120.2(6) . . ?
 O4 C3 O3 126.1(6) . . ?
 O3A C3A C4A 116.3(17) . . ?
 O4A C3A C4A 116.4(16) . . ?
 O4A C3A O3A 125.9(18) . . ?
 C3A C4A H4AA 109.5 . . ?
 C3A C4A H4AB 109.5 . . ?
 C3A C4A H4AC 109.5 . . ?
 H4AA C4A H4AB 109.5 . . ?
 H4AA C4A H4AC 109.5 . . ?
 H4AB C4A H4AC 109.5 . . ?
 C6 C5 Ru1 176.6(7) . . ?
 C6A C5A Ru1 177(3) . . ?
 C5 C6 H6 116.3 . . ?
 C5 C6 C7 127.4(6) . . ?
 C7 C6 H6 116.3 . . ?
 C5A C6A H6A 117.1 . . ?
 C5A C6A C7A 126(2) . . ?
 C7A C6A H6A 117.1 . . ?
 C8 C7 C6 122.0(5) . . ?
 C12 C7 C6 119.3(5) . . ?
 C12 C7 C8 118.6(6) . . ?
 C8A C7A C6A 125.6(14) . . ?
 C8A C7A C12A 116.1(15) . . ?
 C12A C7A C6A 118.3(13) . . ?
 C7 C8 H8 120.4 . . ?
 C7 C8 C9 119.2(6) . . ?
 C9 C8 H8 120.4 . . ?
 C7A C8A H8A 119.0 . . ?
 C7A C8A C9A 122.0(17) . . ?
 C9A C8A H8A 119.0 . . ?
 C8 C9 H9 119.0 . . ?
 C10 C9 C8 122.1(7) . . ?
 C10 C9 H9 119.0 . . ?
 C8A C9A H9A 120.2 . . ?
 C10A C9A C8A 120(2) . . ?
 C10A C9A H9A 120.2 . . ?
 C9 C10 H10 120.4 . . ?
 C9 C10 C11 119.3(7) . . ?
 C11 C10 H10 120.4 . . ?
 C9A C10A H10A 119.5 . . ?
 C9A C10A C11A 121(2) . . ?
 C11A C10A H10A 119.5 . . ?
 C10 C11 H11 120.2 . . ?
 C10 C11 C12 119.6(7) . . ?
 C12 C11 H11 120.2 . . ?
 C10A C11A H11A 121.3 . . ?
 C10A C11A C12A 117(2) . . ?
 C12A C11A H11A 121.3 . . ?
 C7 C12 C11 121.1(6) . . ?
 C7 C12 H12 119.4 . . ?
 C11 C12 H12 119.4 . . ?
 C7A C12A C11A 123.9(18) . . ?
 C7A C12A H12A 118.0 . . ?
 C11A C12A H12A 118.0 . . ?
 H13D C13A H13E 109.5 . . ?
 H13D C13A H13F 109.5 . . ?
 H13E C13A H13F 109.5 . . ?
 C14A C13A H13D 109.5 . . ?
 C14A C13A H13E 109.5 . . ?
 C14A C13A H13F 109.5 . . ?
 C13 C14 H14 105.5 . . ?
 C13 C14 P1 118.3(6) . . ?
 C15 C14 C13 110.3(5) . . ?
 C15 C14 H14 105.5 . . ?
 C15 C14 P1 110.6(5) . . ?
 P1 C14 H14 105.5 . . ?
 C13A C14A H14A 107.8 . . ?
 C13A C14A P1A 111.9(16) . . ?
 C15A C14A C13A 108.3(7) . . ?
 C15A C14A H14A 107.8 . . ?
 C15A C14A P1A 113.0(13) . . ?
 P1A C14A H14A 107.8 . . ?
 C14A C15A H15D 109.5 . . ?
 C14A C15A H15E 109.5 . . ?
 C14A C15A H15F 109.5 . . ?
 H15D C15A H15E 109.5 . . ?
 H15D C15A H15F 109.5 . . ?
 H15E C15A H15F 109.5 . . ?
 H16D C16A H16E 109.5 . . ?
 H16D C16A H16F 109.5 . . ?
 H16E C16A H16F 109.5 . . ?
 C17A C16A H16D 109.5 . . ?
 C17A C16A H16E 109.5 . . ?
 C17A C16A H16F 109.5 . . ?
 C16 C17 H17 106.8 . . ?
 C16 C17 C18 108.4(5) . . ?
 C16 C17 P1 115.9(4) . . ?
 C18 C17 H17 106.8 . . ?
 C18 C17 P1 111.8(5) . . ?
 P1 C17 H17 106.8 . . ?
 C16A C17A H17A 105.5 . . ?
 C16A C17A P1A 118.8(15) . . ?
 C18A C17A C16A 109.6(8) . . ?
 C18A C17A H17A 105.5 . . ?
 C18A C17A P1A 110.9(12) . . ?
 P1A C17A H17A 105.5 . . ?
 C17A C18A H18D 109.5 . . ?
 C17A C18A H18E 109.5 . . ?
 C17A C18A H18F 109.5 . . ?
 H18D C18A H18E 109.5 . . ?
 H18D C18A H18F 109.5 . . ?
 H18E C18A H18F 109.5 . . ?
 H19D C19A H19E 109.5 . . ?
 H19D C19A H19F 109.5 . . ?
 H19E C19A H19F 109.5 . . ?
 C20A C19A H19D 109.5 . . ?
 C20A C19A H19E 109.5 . . ?
 C20A C19A H19F 109.5 . . ?
 C19 C20 H20 107.9 . . ?
 C19 C20 C21 108.1(5) . . ?
 C19 C20 P1 112.9(5) . . ?
 C21 C20 H20 107.9 . . ?
 C21 C20 P1 111.9(6) . . ?
 P1 C20 H20 107.9 . . ?
 C19A C20A H20A 105.1 . . ?
 C19A C20A P1A 117.3(12) . . ?
 C21A C20A C19A 108.8(7) . . ?
 C21A C20A H20A 105.1 . . ?
 C21A C20A P1A 114.2(16) . . ?
 P1A C20A H20A 105.1 . . ?
 C20A C21A H21D 109.5 . . ?
 C20A C21A H21E 109.5 . . ?
 C20A C21A H21F 109.5 . . ?
 H21D C21A H21E 109.5 . . ?
 H21D C21A H21F 109.5 . . ?
 H21E C21A H21F 109.5 . . ?
 H22D C22A H22E 109.5 . . ?
 H22D C22A H22F 109.5 . . ?
 H22E C22A H22F 109.5 . . ?
 C23A C22A H22D 109.5 . . ?
 C23A C22A H22E 109.5 . . ?
 C23A C22A H22F 109.5 . . ?
 C22 C23 H23 105.6 . . ?
 C22 C23 P2 114.5(6) . . ?
 C24 C23 C22 109.6(5) . . ?
 C24 C23 H23 105.6 . . ?
 C24 C23 P2 115.0(6) . . ?
 P2 C23 H23 105.6 . . ?
 C22A C23A H23A 107.4 . . ?
 C22A C23A P2A 113.6(11) . . ?
 C24A C23A C22A 106.8(7) . . ?
 C24A C23A H23A 107.4 . . ?
 C24A C23A P2A 113.9(9) . . ?
 P2A C23A H23A 107.4 . . ?
 C23A C24A H24D 109.5 . . ?
 C23A C24A H24E 109.5 . . ?
 C23A C24A H24F 109.5 . . ?
 H24D C24A H24E 109.5 . . ?
 H24D C24A H24F 109.5 . . ?
 H24E C24A H24F 109.5 . . ?
 H25D C25A H25E 109.5 . . ?
 H25D C25A H25F 109.5 . . ?
 H25E C25A H25F 109.5 . . ?
 C26A C25A H25D 109.5 . . ?
 C26A C25A H25E 109.5 . . ?
 C26A C25A H25F 109.5 . . ?
 C25 C26 H26 107.5 . . ?
 C25 C26 P2 112.8(5) . . ?
 C27 C26 C25 105.7(6) . . ?
 C27 C26 H26 107.5 . . ?
 C27 C26 P2 115.7(5) . . ?
 P2 C26 H26 107.5 . . ?
 C25A C26A H26A 105.9 . . ?
 C25A C26A C27A 108.5(7) . . ?
 C25A C26A P2A 115.2(9) . . ?
 C27A C26A H26A 105.9 . . ?
 C27A C26A P2A 114.6(11) . . ?
 P2A C26A H26A 105.9 . . ?
 C26A C27A H27D 109.5 . . ?
 C26A C27A H27E 109.5 . . ?
 C26A C27A H27F 109.5 . . ?
 H27D C27A H27E 109.5 . . ?
 H27D C27A H27F 109.5 . . ?
 H27E C27A H27F 109.5 . . ?
 H28D C28A H28E 109.5 . . ?
 H28D C28A H28F 109.5 . . ?
 H28E C28A H28F 109.5 . . ?
 C29A C28A H28D 109.5 . . ?
 C29A C28A H28E 109.5 . . ?
 C29A C28A H28F 109.5 . . ?
 C28 C29 H29 104.7 . . ?
 C28 C29 P2 113.6(8) . . ?
 C30 C29 C28 110.3(6) . . ?
 C30 C29 H29 104.7 . . ?
 C30 C29 P2 117.3(8) . . ?
 P2 C29 H29 104.7 . . ?
 C28A C29A H29A 107.0 . . ?
 C28A C29A C30A 108.6(8) . . ?
 C28A C29A P2A 111.6(15) . . ?
 C30A C29A H29A 107.0 . . ?
 C30A C29A P2A 115.0(15) . . ?
 P2A C29A H29A 107.0 . . ?
 C29A C30A H30D 109.5 . . ?
 C29A C30A H30E 109.5 . . ?
 C29A C30A H30F 109.5 . . ?
 H30D C30A H30E 109.5 . . ?
 H30D C30A H30F 109.5 . . ?
 H30E C30A H30F 109.5 . . ?
 C1 O1 Ru1 88.8(2) . . ?
 C1 O2 Ru1 92.7(2) . . ?
 C3 O3 Ru1 128.9(6) . . ?
 C3A O3A Ru1 128.7(16) . . ?
 C14 P1 C17 105.7(3) . . ?
 C14 P1 Ru1 108.61(19) . . ?
 C17 P1 Ru1 114.4(2) . . ?
 C20 P1 C14 103.5(3) . . ?
 C20 P1 C17 105.8(3) . . ?
 C20 P1 Ru1 117.77(19) . . ?
 C14A P1A C17A 103.1(8) . . ?
 C14A P1A C20A 106.6(8) . . ?
 C14A P1A Ru1 114.1(6) . . ?
 C17A P1A C20A 105.6(8) . . ?
 C17A P1A Ru1 111.3(5) . . ?
 C20A P1A Ru1 115.1(6) . . ?
 C23 P2 C26 103.0(3) . . ?
 C23 P2 Ru1 113.3(2) . . ?
 C26 P2 Ru1 111.7(2) . . ?
 C29 P2 C23 105.0(5) . . ?
 C29 P2 C26 100.8(5) . . ?
 C29 P2 Ru1 120.9(4) . . ?
 C23A P2A Ru1 111.0(5) . . ?
 C26A P2A C23A 102.7(6) . . ?
 C26A P2A Ru1 112.5(4) . . ?
 C29A P2A C23A 100.4(8) . . ?
 C29A P2A C26A 103.5(8) . . ?
 C29A P2A Ru1 124.1(8) . . ?
 C5 Ru1 C1 131.4(3) . . ?
 C5 Ru1 O1 160.8(3) . . ?
 C5 Ru1 O2 101.6(3) . . ?
 C5 Ru1 O3 98.5(3) . . ?
 C5 Ru1 O3A 2.0(10) . . ?
 C5 Ru1 P1 93.5(3) . . ?
 C5 Ru1 P1A 84.5(3) . . ?
 C5 Ru1 P2 95.8(3) . . ?
 C5 Ru1 P2A 88.1(3) . . ?
 C5A Ru1 C1 129.2(13) . . ?
 C5A Ru1 C5 99.4(15) . . ?
 C5A Ru1 O1 99.9(13) . . ?
 C5A Ru1 O2 159.0(13) . . ?
 C5A Ru1 O3 0.9(15) . . ?
 C5A Ru1 O3A 99.9(12) . . ?
 C5A Ru1 P1 86.7(11) . . ?
 C5A Ru1 P1A 96.5(11) . . ?
 C5A Ru1 P2 88.1(11) . . ?
 C5A Ru1 P2A 96.0(11) . . ?
 O1 Ru1 C1 29.32(12) . . ?
 O1 Ru1 P1 87.65(9) . . ?
 O1 Ru1 P1A 93.41(14) . . ?
 O1 Ru1 P2 84.73(10) . . ?
 O1 Ru1 P2A 89.80(14) . . ?
 O2 Ru1 C1 29.83(13) . . ?
 O2 Ru1 O1 59.14(12) . . ?
 O2 Ru1 P1 90.92(9) . . ?
 O2 Ru1 P1A 84.46(15) . . ?
 O2 Ru1 P2 90.87(11) . . ?
 O2 Ru1 P2A 85.80(15) . . ?
 O3 Ru1 C1 130.1(3) . . ?
 O3 Ru1 O1 100.8(3) . . ?
 O3 Ru1 O2 159.9(3) . . ?
 O3 Ru1 O3A 99.0(8) . . ?
 O3 Ru1 P1 86.9(3) . . ?
 O3 Ru1 P1A 96.6(3) . . ?
 O3 Ru1 P2 88.1(3) . . ?
 O3 Ru1 P2A 95.9(3) . . ?
 O3A Ru1 C1 130.9(6) . . ?
 O3A Ru1 O1 160.1(6) . . ?
 O3A Ru1 O2 101.1(6) . . ?
 O3A Ru1 P1 95.5(8) . . ?
 O3A Ru1 P1A 86.4(8) . . ?
 O3A Ru1 P2 93.9(8) . . ?
 O3A Ru1 P2A 86.1(8) . . ?
 P1 Ru1 C1 89.19(9) . . ?
 P1 Ru1 P1A 12.42(10) . . ?
 P1 Ru1 P2 169.90(7) . . ?
 P1 Ru1 P2A 176.57(13) . . ?
 P1A Ru1 C1 88.84(15) . . ?
 P1A Ru1 P2 175.27(14) . . ?
 P2 Ru1 C1 87.42(11) . . ?
 P2A Ru1 C1 87.47(15) . . ?
 P2A Ru1 P1A 166.33(16) . . ?
 P2A Ru1 P2 10.26(11) . . ?

loop_
  _geom_torsion_atom_site_label_1
  _geom_torsion_atom_site_label_2
  _geom_torsion_atom_site_label_3
  _geom_torsion_atom_site_label_4
  _geom_torsion
  _geom_torsion_site_symmetry_1
  _geom_torsion_site_symmetry_2
  _geom_torsion_site_symmetry_3
  _geom_torsion_site_symmetry_4
  _geom_torsion_publ_flag
 C1 O1 Ru1 C5 -1.5(9) . . . . ?
 C1 O1 Ru1 C5A 178.8(11) . . . . ?
 C1 O1 Ru1 O2 0.0(2) . . . . ?
 C1 O1 Ru1 O3 178.9(3) . . . . ?
 C1 O1 Ru1 O3A -7(2) . . . . ?
 C1 O1 Ru1 P1 92.5(2) . . . . ?
 C1 O1 Ru1 P1A 81.5(3) . . . . ?
 C1 O1 Ru1 P2 -94.1(2) . . . . ?
 C1 O1 Ru1 P2A -85.2(3) . . . . ?
 C1 O2 Ru1 C5 179.4(4) . . . . ?
 C1 O2 Ru1 C5A -4(3) . . . . ?
 C1 O2 Ru1 O1 0.0(2) . . . . ?
 C1 O2 Ru1 O3 -3.4(9) . . . . ?
 C1 O2 Ru1 O3A 177.4(8) . . . . ?
 C1 O2 Ru1 P1 -86.8(2) . . . . ?
 C1 O2 Ru1 P1A -97.4(3) . . . . ?
 C1 O2 Ru1 P2 83.3(2) . . . . ?
 C1 O2 Ru1 P2A 92.2(3) . . . . ?
 C2 C1 O1 Ru1 178.3(4) . . . . ?
 C2 C1 O2 Ru1 -178.3(4) . . . . ?
 C2 C1 Ru1 C5 25(6) . . . . ?
 C2 C1 Ru1 C5A -156(6) . . . . ?
 C2 C1 Ru1 O1 -155(6) . . . . ?
 C2 C1 Ru1 O2 25(6) . . . . ?
 C2 C1 Ru1 O3 -156(6) . . . . ?
 C2 C1 Ru1 O3A 22(6) . . . . ?
 C2 C1 Ru1 P1 119(6) . . . . ?
 C2 C1 Ru1 P1A 106(6) . . . . ?
 C2 C1 Ru1 P2 -71(6) . . . . ?
 C2 C1 Ru1 P2A -61(6) . . . . ?
 C3 O3 Ru1 C1 -178.1(7) . . . . ?
 C3 O3 Ru1 C5 1.3(9) . . . . ?
 C3 O3 Ru1 O1 -178.9(8) . . . . ?
 C3 O3 Ru1 O2 -175.9(5) . . . . ?
 C3 O3 Ru1 O3A 3.2(12) . . . . ?
 C3 O3 Ru1 P1 -91.9(8) . . . . ?
 C3 O3 Ru1 P1A -84.1(8) . . . . ?
 C3 O3 Ru1 P2 96.9(8) . . . . ?
 C3 O3 Ru1 P2A 90.2(8) . . . . ?
 C3A O3A Ru1 C1 173(2) . . . . ?
 C3A O3A Ru1 C5 66(26) . . . . ?
 C3A O3A Ru1 C5A -8(3) . . . . ?
 C3A O3A Ru1 O1 177.5(12) . . . . ?
 C3A O3A Ru1 O2 171(2) . . . . ?
 C3A O3A Ru1 O3 -9(3) . . . . ?
 C3A O3A Ru1 P1 79(3) . . . . ?
 C3A O3A Ru1 P1A 88(3) . . . . ?
 C3A O3A Ru1 P2 -97(3) . . . . ?
 C3A O3A Ru1 P2A -104(3) . . . . ?
 C4 C3 O3 Ru1 179.1(8) . . . . ?
 C4A C3A O3A Ru1 -179(2) . . . . ?
 C5 C6 C7 C8 -4.4(10) . . . . ?
 C5 C6 C7 C12 175.6(7) . . . . ?
 C5A C6A C7A C8A 5(3) . . . . ?
 C5A C6A C7A C12A -174(2) . . . . ?
 C6 C5 Ru1 C1 -72(14) . . . . ?
 C6 C5 Ru1 C5A 109(14) . . . . ?
 C6 C5 Ru1 O1 -71(14) . . . . ?
 C6 C5 Ru1 O2 -72(14) . . . . ?
 C6 C5 Ru1 O3 109(14) . . . . ?
 C6 C5 Ru1 O3A 3(17) . . . . ?
 C6 C5 Ru1 P1 -164(14) . . . . ?
 C6 C5 Ru1 P1A -155(14) . . . . ?
 C6 C5 Ru1 P2 20(14) . . . . ?
 C6 C5 Ru1 P2A 13(14) . . . . ?
 C6 C7 C8 C9 -179.3(7) . . . . ?
 C6 C7 C12 C11 -179.5(7) . . . . ?
 C6A C5A Ru1 C1 172(51) . . . . ?
 C6A C5A Ru1 C5 -8(52) . . . . ?
 C6A C5A Ru1 O1 171(51) . . . . ?
 C6A C5A Ru1 O2 175(49) . . . . ?
 C6A C5A Ru1 O3 -1(44) . . . . ?
 C6A C5A Ru1 O3A -6(52) . . . . ?
 C6A C5A Ru1 P1 -101(52) . . . . ?
 C6A C5A Ru1 P1A -94(51) . . . . ?
 C6A C5A Ru1 P2 87(52) . . . . ?
 C6A C5A Ru1 P2A 81(52) . . . . ?
 C6A C7A C8A C9A -178(2) . . . . ?
 C6A C7A C12A C11A 179(2) . . . . ?
 C7 C8 C9 C10 -2.8(13) . . . . ?
 C7A C8A C9A C10A -1(4) . . . . ?
 C8 C7 C12 C11 0.5(10) . . . . ?
 C8 C9 C10 C11 3.4(16) . . . . ?
 C8A C7A C12A C11A 1(3) . . . . ?
 C8A C9A C10A C11A 1(5) . . . . ?
 C9 C10 C11 C12 -2.1(16) . . . . ?
 C9A C10A C11A C12A 0(5) . . . . ?
 C10 C11 C12 C7 0.1(13) . . . . ?
 C10A C11A C12A C7A -1(4) . . . . ?
 C12 C7 C8 C9 0.7(11) . . . . ?
 C12A C7A C8A C9A 0(3) . . . . ?
 C13 C14 P1 C17 68.5(7) . . . . ?
 C13 C14 P1 C20 -42.5(7) . . . . ?
 C13 C14 P1 Ru1 -168.4(6) . . . . ?
 C13A C14A P1A C17A 42.7(15) . . . . ?
 C13A C14A P1A C20A 153.6(14) . . . . ?
 C13A C14A P1A Ru1 -78.2(15) . . . . ?
 C14 P1 Ru1 C1 44.7(3) . . . . ?
 C14 P1 Ru1 C5 176.2(4) . . . . ?
 C14 P1 Ru1 C5A -84.6(13) . . . . ?
 C14 P1 Ru1 O1 15.4(3) . . . . ?
 C14 P1 Ru1 O2 74.5(3) . . . . ?
 C14 P1 Ru1 O3 -85.5(4) . . . . ?
 C14 P1 Ru1 O3A 175.7(7) . . . . ?
 C14 P1 Ru1 P1A 133.0(7) . . . . ?
 C14 P1 Ru1 P2 -25.7(5) . . . . ?
 C14 P1 Ru1 P2A 57(2) . . . . ?
 C14A P1A Ru1 C1 72.5(7) . . . . ?
 C14A P1A Ru1 C5 -155.7(7) . . . . ?
 C14A P1A Ru1 C5A -56.9(14) . . . . ?
 C14A P1A Ru1 O1 43.5(7) . . . . ?
 C14A P1A Ru1 O2 102.0(7) . . . . ?
 C14A P1A Ru1 O3 -57.8(7) . . . . ?
 C14A P1A Ru1 O3A -156.4(9) . . . . ?
 C14A P1A Ru1 P1 -19.0(8) . . . . ?
 C14A P1A Ru1 P2 110.2(16) . . . . ?
 C14A P1A Ru1 P2A 146.8(9) . . . . ?
 C15 C14 P1 C17 -60.1(5) . . . . ?
 C15 C14 P1 C20 -171.0(5) . . . . ?
 C15 C14 P1 Ru1 63.1(5) . . . . ?
 C15A C14A P1A C17A 165.4(13) . . . . ?
 C15A C14A P1A C20A -83.7(14) . . . . ?
 C15A C14A P1A Ru1 44.5(15) . . . . ?
 C16 C17 P1 C14 -43.3(6) . . . . ?
 C16 C17 P1 C20 66.0(5) . . . . ?
 C16 C17 P1 Ru1 -162.7(4) . . . . ?
 C16A C17A P1A C14A 45.5(16) . . . . ?
 C16A C17A P1A C20A -66.2(16) . . . . ?
 C16A C17A P1A Ru1 168.2(14) . . . . ?
 C17 P1 Ru1 C1 162.5(2) . . . . ?
 C17 P1 Ru1 C5 -66.0(4) . . . . ?
 C17 P1 Ru1 C5A 33.2(13) . . . . ?
 C17 P1 Ru1 O1 133.2(2) . . . . ?
 C17 P1 Ru1 O2 -167.7(2) . . . . ?
 C17 P1 Ru1 O3 32.3(3) . . . . ?
 C17 P1 Ru1 O3A -66.5(7) . . . . ?
 C17 P1 Ru1 P1A -109.2(7) . . . . ?
 C17 P1 Ru1 P2 92.1(5) . . . . ?
 C17 P1 Ru1 P2A 175(2) . . . . ?
 C17A P1A Ru1 C1 -43.7(6) . . . . ?
 C17A P1A Ru1 C5 88.2(7) . . . . ?
 C17A P1A Ru1 C5A -173.0(14) . . . . ?
 C17A P1A Ru1 O1 -72.6(6) . . . . ?
 C17A P1A Ru1 O2 -14.1(6) . . . . ?
 C17A P1A Ru1 O3 -173.9(6) . . . . ?
 C17A P1A Ru1 O3A 87.4(9) . . . . ?
 C17A P1A Ru1 P1 -135.2(10) . . . . ?
 C17A P1A Ru1 P2 -5.9(18) . . . . ?
 C17A P1A Ru1 P2A 30.6(10) . . . . ?
 C18 C17 P1 C14 -168.2(6) . . . . ?
 C18 C17 P1 C20 -58.8(6) . . . . ?
 C18 C17 P1 Ru1 72.4(6) . . . . ?
 C18A C17A P1A C14A 173.9(13) . . . . ?
 C18A C17A P1A C20A 62.2(14) . . . . ?
 C18A C17A P1A Ru1 -63.4(13) . . . . ?
 C19 C20 P1 C14 -168.7(5) . . . . ?
 C19 C20 P1 C17 80.4(6) . . . . ?
 C19 C20 P1 Ru1 -48.9(6) . . . . ?
 C19A C20A P1A C14A -70.2(15) . . . . ?
 C19A C20A P1A C17A 38.9(15) . . . . ?
 C19A C20A P1A Ru1 162.2(12) . . . . ?
 C20 P1 Ru1 C1 -72.4(2) . . . . ?
 C20 P1 Ru1 C5 59.1(4) . . . . ?
 C20 P1 Ru1 C5A 158.3(13) . . . . ?
 C20 P1 Ru1 O1 -101.7(2) . . . . ?
 C20 P1 Ru1 O2 -42.6(2) . . . . ?
 C20 P1 Ru1 O3 157.4(3) . . . . ?
 C20 P1 Ru1 O3A 58.6(7) . . . . ?
 C20 P1 Ru1 P1A 15.9(6) . . . . ?
 C20 P1 Ru1 P2 -142.8(4) . . . . ?
 C20 P1 Ru1 P2A -60(2) . . . . ?
 C20A P1A Ru1 C1 -163.8(6) . . . . ?
 C20A P1A Ru1 C5 -31.9(7) . . . . ?
 C20A P1A Ru1 C5A 66.9(14) . . . . ?
 C20A P1A Ru1 O1 167.3(6) . . . . ?
 C20A P1A Ru1 O2 -134.2(6) . . . . ?
 C20A P1A Ru1 O3 66.0(7) . . . . ?
 C20A P1A Ru1 O3A -32.7(9) . . . . ?
 C20A P1A Ru1 P1 104.7(10) . . . . ?
 C20A P1A Ru1 P2 -126.0(16) . . . . ?
 C20A P1A Ru1 P2A -89.4(10) . . . . ?
 C21 C20 P1 C14 -46.4(6) . . . . ?
 C21 C20 P1 C17 -157.3(5) . . . . ?
 C21 C20 P1 Ru1 73.4(6) . . . . ?
 C21A C20A P1A C14A 58.9(16) . . . . ?
 C21A C20A P1A C17A 168.1(14) . . . . ?
 C21A C20A P1A Ru1 -68.7(15) . . . . ?
 C22 C23 P2 C26 -61.2(7) . . . . ?
 C22 C23 P2 C29 44.0(8) . . . . ?
 C22 C23 P2 Ru1 178.0(6) . . . . ?
 C22A C23A P2A C26A 33.7(11) . . . . ?
 C22A C23A P2A C29A 140.2(12) . . . . ?
 C22A C23A P2A Ru1 -86.8(10) . . . . ?
 C23 P2 Ru1 C1 41.9(3) . . . . ?
 C23 P2 Ru1 C5 -89.5(4) . . . . ?
 C23 P2 Ru1 C5A 171.3(13) . . . . ?
 C23 P2 Ru1 O1 71.2(3) . . . . ?
 C23 P2 Ru1 O2 12.3(3) . . . . ?
 C23 P2 Ru1 O3 172.2(4) . . . . ?
 C23 P2 Ru1 O3A -88.9(7) . . . . ?
 C23 P2 Ru1 P1 112.5(5) . . . . ?
 C23 P2 Ru1 P1A 4.2(17) . . . . ?
 C23 P2 Ru1 P2A -48.1(10) . . . . ?
 C23A P2A Ru1 C1 73.3(5) . . . . ?
 C23A P2A Ru1 C5 -58.3(6) . . . . ?
 C23A P2A Ru1 C5A -157.5(14) . . . . ?
 C23A P2A Ru1 O1 102.5(5) . . . . ?
 C23A P2A Ru1 O2 43.5(5) . . . . ?
 C23A P2A Ru1 O3 -156.6(6) . . . . ?
 C23A P2A Ru1 O3A -58.0(8) . . . . ?
 C23A P2A Ru1 P1 61(2) . . . . ?
 C23A P2A Ru1 P1A -1.2(10) . . . . ?
 C23A P2A Ru1 P2 162.8(12) . . . . ?
 C24 C23 P2 C26 170.6(7) . . . . ?
 C24 C23 P2 C29 -84.3(8) . . . . ?
 C24 C23 P2 Ru1 49.7(7) . . . . ?
 C24A C23A P2A C26A 156.3(11) . . . . ?
 C24A C23A P2A C29A -97.2(13) . . . . ?
 C24A C23A P2A Ru1 35.8(12) . . . . ?
 C25 C26 P2 C23 -33.2(6) . . . . ?
 C25 C26 P2 C29 -141.5(6) . . . . ?
 C25 C26 P2 Ru1 88.8(6) . . . . ?
 C25A C26A P2A C23A 61.1(12) . . . . ?
 C25A C26A P2A C29A -43.0(13) . . . . ?
 C25A C26A P2A Ru1 -179.5(9) . . . . ?
 C26 P2 Ru1 C1 -73.9(3) . . . . ?
 C26 P2 Ru1 C5 154.7(4) . . . . ?
 C26 P2 Ru1 C5A 55.5(13) . . . . ?
 C26 P2 Ru1 O1 -44.6(3) . . . . ?
 C26 P2 Ru1 O2 -103.5(3) . . . . ?
 C26 P2 Ru1 O3 56.4(4) . . . . ?
 C26 P2 Ru1 O3A 155.3(7) . . . . ?
 C26 P2 Ru1 P1 -3.3(6) . . . . ?
 C26 P2 Ru1 P1A -111.6(16) . . . . ?
 C26 P2 Ru1 P2A -163.9(11) . . . . ?
 C26A P2A Ru1 C1 -41.2(5) . . . . ?
 C26A P2A Ru1 C5 -172.8(6) . . . . ?
 C26A P2A Ru1 C5A 88.0(14) . . . . ?
 C26A P2A Ru1 O1 -12.0(5) . . . . ?
 C26A P2A Ru1 O2 -71.0(5) . . . . ?
 C26A P2A Ru1 O3 88.9(6) . . . . ?
 C26A P2A Ru1 O3A -172.5(8) . . . . ?
 C26A P2A Ru1 P1 -54(2) . . . . ?
 C26A P2A Ru1 P1A -115.7(8) . . . . ?
 C26A P2A Ru1 P2 48.3(10) . . . . ?
 C27 C26 P2 C23 -154.9(6) . . . . ?
 C27 C26 P2 C29 96.8(7) . . . . ?
 C27 C26 P2 Ru1 -33.0(7) . . . . ?
 C27A C26A P2A C23A -171.9(11) . . . . ?
 C27A C26A P2A C29A 84.0(13) . . . . ?
 C27A C26A P2A Ru1 -52.5(12) . . . . ?
 C28 C29 P2 C23 -166.2(8) . . . . ?
 C28 C29 P2 C26 -59.4(9) . . . . ?
 C28 C29 P2 Ru1 64.2(9) . . . . ?
 C28A C29A P2A C23A 64.7(14) . . . . ?
 C28A C29A P2A C26A 170.6(12) . . . . ?
 C28A C29A P2A Ru1 -59.6(15) . . . . ?
 C29 P2 Ru1 C1 167.8(4) . . . . ?
 C29 P2 Ru1 C5 36.4(5) . . . . ?
 C29 P2 Ru1 C5A -62.8(13) . . . . ?
 C29 P2 Ru1 O1 -162.9(4) . . . . ?
 C29 P2 Ru1 O2 138.2(4) . . . . ?
 C29 P2 Ru1 O3 -61.9(5) . . . . ?
 C29 P2 Ru1 O3A 37.0(8) . . . . ?
 C29 P2 Ru1 P1 -121.6(5) . . . . ?
 C29 P2 Ru1 P1A 130.1(16) . . . . ?
 C29 P2 Ru1 P2A 77.8(10) . . . . ?
 C29A P2A Ru1 C1 -167.2(8) . . . . ?
 C29A P2A Ru1 C5 61.2(8) . . . . ?
 C29A P2A Ru1 C5A -38.0(15) . . . . ?
 C29A P2A Ru1 O1 -137.9(8) . . . . ?
 C29A P2A Ru1 O2 163.0(8) . . . . ?
 C29A P2A Ru1 O3 -37.1(8) . . . . ?
 C29A P2A Ru1 O3A 61.6(10) . . . . ?
 C29A P2A Ru1 P1 -180(100) . . . . ?
 C29A P2A Ru1 P1A 118.4(10) . . . . ?
 C29A P2A Ru1 P2 -77.6(11) . . . . ?
 C30 C29 P2 C23 63.1(10) . . . . ?
 C30 C29 P2 C26 169.9(8) . . . . ?
 C30 C29 P2 Ru1 -66.5(9) . . . . ?
 C30A C29A P2A C23A -170.9(14) . . . . ?
 C30A C29A P2A C26A -65.0(15) . . . . ?
 C30A C29A P2A Ru1 64.7(16) . . . . ?
 O1 C1 O2 Ru1 0.1(4) . . . . ?
 O1 C1 Ru1 C5 179.3(4) . . . . ?
 O1 C1 Ru1 C5A -1.6(14) . . . . ?
 O1 C1 Ru1 O2 -179.9(4) . . . . ?
 O1 C1 Ru1 O3 -1.4(4) . . . . ?
 O1 C1 Ru1 O3A 176.8(10) . . . . ?
 O1 C1 Ru1 P1 -86.7(2) . . . . ?
 O1 C1 Ru1 P1A -99.1(3) . . . . ?
 O1 C1 Ru1 P2 83.8(2) . . . . ?
 O1 C1 Ru1 P2A 94.1(2) . . . . ?
 O2 C1 O1 Ru1 -0.1(4) . . . . ?
 O2 C1 Ru1 C5 -0.7(5) . . . . ?
 O2 C1 Ru1 C5A 178.3(14) . . . . ?
 O2 C1 Ru1 O1 179.9(4) . . . . ?
 O2 C1 Ru1 O3 178.5(4) . . . . ?
 O2 C1 Ru1 O3A -3.3(11) . . . . ?
 O2 C1 Ru1 P1 93.3(2) . . . . ?
 O2 C1 Ru1 P1A 80.9(3) . . . . ?
 O2 C1 Ru1 P2 -96.3(2) . . . . ?
 O2 C1 Ru1 P2A -86.0(3) . . . . ?
 O4 C3 O3 Ru1 -1.2(13) . . . . ?
 O4A C3A O3A Ru1 15(4) . . . . ?
 Ru1 C5 C6 C7 71(14) . . . . ?
 Ru1 C5A C6A C7A -171(50) . . . . ?

loop_
  _exptl_crystal_face_index_h
  _exptl_crystal_face_index_k
  _exptl_crystal_face_index_l
  _exptl_crystal_face_perp_dist
  _exptl_oxdiff_crystal_face_indexfrac_h
  _exptl_oxdiff_crystal_face_indexfrac_k
  _exptl_oxdiff_crystal_face_indexfrac_l
  _exptl_oxdiff_crystal_face_x
  _exptl_oxdiff_crystal_face_y
  _exptl_oxdiff_crystal_face_z
 -13 -13 8 0.0891 -13.0069 -12.9951 8.0075 -0.3059 -0.9342 0.2407
 10 11 -15 0.0429 10.0089 10.9887 -15.0021 0.3466 0.9201 0.1072
 12 12 12 0.0726 11.9989 12.0118 11.9852 0.1317 0.4503 -0.9015
 -4 -4 23 0.1035 -4.0100 -3.9812 22.9939 -0.2537 -0.7240 -0.6457
 -12 11 -12 0.0337 -11.9940 10.9871 -11.9836 0.8471 -0.1410 0.4950
 12 -7 16 0.0568 11.9933 -6.9839 15.9823 -0.7080 0.1098 -0.7058
 9 -18 1 0.0395 8.9965 -17.9965 0.9903 -0.9881 0.1447 0.0814
 0 17 14 0.1019 -0.0017 17.0109 13.9955 0.6147 -0.0690 -0.7911
 -11 -10 -15 0.0684 -10.9973 -10.0142 -14.9847 -0.0471 -0.3143 0.9488
 18 -3 0 0.0347 18.0008 -2.9964 -0.0163 -0.5563 0.7757 -0.3503
 -18 4 -2 0.0484 -17.9998 3.9947 -1.9828 0.6144 -0.7197 0.4027
#end
data_Complex6d
_audit_creation_date             2011-10-05
_audit_creation_method           
;
  Olex2 1.1
  (compiled 2011.09.07 svn.r1971, GUI svn.r3853)
;
_chemical_name_common            ?
_chemical_name_systematic        
;
 ? 
;
_chemical_formula_moiety         'C60 H50 O4 P2 Ru'
_chemical_formula_sum            'C60 H50 O4 P2 Ru'
_chemical_formula_weight         998.01
_chemical_melting_point          ?
_chemical_oxdiff_formula         'C60 H51 O4 P2 Ru1'
_chemical_oxdiff_usercomment     "Oliver's ojsp21"
loop_
_atom_type_symbol
_atom_type_description
_atom_type_scat_dispersion_real
_atom_type_scat_dispersion_imag
_atom_type_scat_source
C C 0.0033 0.0016 'International Tables Vol C Tables 4.2.6.8 and 6.1.1.4'
H H 0.0000 0.0000 'International Tables Vol C Tables 4.2.6.8 and 6.1.1.4'
O O 0.0106 0.0060 'International Tables Vol C Tables 4.2.6.8 and 6.1.1.4'
P P 0.1023 0.0942 'International Tables Vol C Tables 4.2.6.8 and 6.1.1.4'
Ru Ru -1.2594 0.8363 'International Tables Vol C Tables 4.2.6.8 and 6.1.1.4'

_space_group_crystal_system      monoclinic
_space_group_IT_number           14
_space_group_name_H-M_alt        'P 1 21/n 1'
_space_group_name_Hall           '-P 2yn'
loop_
_space_group_symop_id
_space_group_symop_operation_xyz
1 'x, y, z'
2 '-x+1/2, y+1/2, -z+1/2'
3 '-x, -y, -z'
4 'x-1/2, -y-1/2, z-1/2'

_cell_length_a                   20.2280(3)
_cell_length_b                   23.5455(3)
_cell_length_c                   21.7027(3)
_cell_angle_alpha                90.00
_cell_angle_beta                 113.3119(18)
_cell_angle_gamma                90.00
_cell_volume                     9492.7(2)
_cell_formula_units_Z            8
_cell_measurement_reflns_used    13397
_cell_measurement_temperature    110.0
_cell_measurement_theta_max      28.7491
_cell_measurement_theta_min      2.8395
_exptl_absorpt_coefficient_mu    0.448
_exptl_absorpt_correction_T_max  0.965
_exptl_absorpt_correction_T_min  0.930
_exptl_absorpt_correction_type   analytical
_exptl_absorpt_process_details   
;
CrysAlisPro, Oxford Diffraction Ltd.,
Version 1.171.34.44 (release 25-10-2010 CrysAlis171 .NET)
(compiled Oct 25 2010,18:11:34)
Analytical numeric absorption correction using a multifaceted crystal
			model based on expressions derived by R.C. Clark & J.S. Reid.
(Clark, R. C. & Reid, J. S. (1995). Acta Cryst. A51, 887-897)
;
_exptl_crystal_colour            'clear orange'
_exptl_crystal_colour_lustre     clear
_exptl_crystal_colour_modifier   .
_exptl_crystal_colour_primary    orange
_exptl_crystal_density_diffrn    1.397
_exptl_crystal_density_meas      ?
_exptl_crystal_density_method    'not measured'
_exptl_crystal_description       plate
_exptl_crystal_F_000             4128
_exptl_crystal_size_max          0.3107
_exptl_crystal_size_mid          0.1512
_exptl_crystal_size_min          0.0886
_exptl_special_details           
;
 ? 
;
_diffrn_reflns_av_R_equivalents  0.0332
_diffrn_reflns_av_unetI/netI     0.0557
_diffrn_reflns_limit_h_max       24
_diffrn_reflns_limit_h_min       -26
_diffrn_reflns_limit_k_max       25
_diffrn_reflns_limit_k_min       -31
_diffrn_reflns_limit_l_max       27
_diffrn_reflns_limit_l_min       -26
_diffrn_reflns_number            46057
_diffrn_reflns_theta_full        25.92
_diffrn_reflns_theta_max         28.81
_diffrn_reflns_theta_min         2.85
_diffrn_ambient_temperature      110.0
_diffrn_detector_area_resol_mean 16.1450
_diffrn_measured_fraction_theta_full 0.998
_diffrn_measured_fraction_theta_max 0.846
_diffrn_measurement_details      
;
#__ type_ start__ end____ width___ exp.time_
  1 omega   -9.00   86.00   1.0000   29.4200
omega____ theta____ kappa____ phi______ frames
    -       18.1652   77.0000 -180.0000 95

#__ type_ start__ end____ width___ exp.time_
  2 omega   13.00   62.00   1.0000   29.4200
omega____ theta____ kappa____ phi______ frames
    -       18.1652   77.0000    0.0000 49

#__ type_ start__ end____ width___ exp.time_
  3 omega  -46.00   48.00   1.0000   29.4200
omega____ theta____ kappa____ phi______ frames
    -       18.1652  -77.0000   60.0000 94
;
_diffrn_measurement_device_type  'SuperNova, Single source at offset), Eos'
_diffrn_measurement_method       '\w scans'
_diffrn_orient_matrix_UB_11      -0.0274597000
_diffrn_orient_matrix_UB_12      -0.0066136000
_diffrn_orient_matrix_UB_13      0.0114300000
_diffrn_orient_matrix_UB_21      0.0075887000
_diffrn_orient_matrix_UB_22      -0.0293362000
_diffrn_orient_matrix_UB_23      -0.0007495000
_diffrn_orient_matrix_UB_31      0.0254609000
_diffrn_orient_matrix_UB_32      0.0016019000
_diffrn_orient_matrix_UB_33      0.0336814000
_diffrn_radiation_monochromator  mirror
_diffrn_radiation_type           'Mo K\a'
_diffrn_radiation_wavelength     0.7107
_diffrn_source                   'SuperNova (Mo) X-ray Source'
_diffrn_standards_decay_%        ?
_diffrn_standards_interval_count ?
_diffrn_standards_interval_time  ?
_diffrn_standards_number         ?
_reflns_number_gt                13946
_reflns_number_total             20974
_reflns_odcompleteness_completeness 99.80
_reflns_odcompleteness_iscentric 1
_reflns_odcompleteness_theta     25.97
_reflns_threshold_expression     >2sigma(I)
_computing_cell_refinement       
;
CrysAlisPro, Oxford Diffraction Ltd.,
Version 1.171.34.44 (release 25-10-2010 CrysAlis171 .NET)
(compiled Oct 25 2010,18:11:34)
;
_computing_data_collection       
;
CrysAlisPro, Oxford Diffraction Ltd.,
Version 1.171.34.44 (release 25-10-2010 CrysAlis171 .NET)
(compiled Oct 25 2010,18:11:34)
;
_computing_data_reduction        
;
CrysAlisPro, Oxford Diffraction Ltd.,
Version 1.171.34.44 (release 25-10-2010 CrysAlis171 .NET)
(compiled Oct 25 2010,18:11:34)
;
_computing_molecular_graphics    
;
O. V. Dolomanov, L. J. Bourhis, R. J. Gildea, J. A. K. Howard and H. Puschmann,
OLEX2: a complete structure solution, refinement and analysis program.
J. Appl. Cryst. (2009). 42, 339-341.
;
_computing_publication_material  
;
O. V. Dolomanov, L. J. Bourhis, R. J. Gildea, J. A. K. Howard and H. Puschmann,
OLEX2: a complete structure solution, refinement and analysis program.
J. Appl. Cryst. (2009). 42, 339-341.
;
_computing_structure_refinement  
;
XL, G.M. Sheldrick, Acta Cryst.
(2008). A64, 112-122
;
_computing_structure_solution    
;
SHELXS, G.M. Sheldrick, Acta Cryst.
(2008). A64, 112-122
;
_refine_diff_density_max         0.658
_refine_diff_density_min         -0.996
_refine_diff_density_rms         0.076
_refine_ls_extinction_coef       ?
_refine_ls_extinction_method     none
_refine_ls_goodness_of_fit_ref   1.042
_refine_ls_hydrogen_treatment    constr
_refine_ls_matrix_type           full
_refine_ls_number_parameters     1307
_refine_ls_number_reflns         20974
_refine_ls_number_restraints     5
_refine_ls_R_factor_all          0.0757
_refine_ls_R_factor_gt           0.0431
_refine_ls_restrained_S_all      1.042
_refine_ls_shift/su_max          0.002
_refine_ls_shift/su_mean         0.000
_refine_ls_structure_factor_coef Fsqd
_refine_ls_weighting_details     
'calc w=1/[\s^2^(Fo^2^)+(0.0320P)^2^+4.5932P] where P=(Fo^2^+2Fc^2^)/3'
_refine_ls_weighting_scheme      calc
_refine_ls_wR_factor_gt          0.0893
_refine_ls_wR_factor_ref         0.1075
_refine_special_details          
;
 Refinement of F^2^ against ALL reflections.  The weighted R-factor wR and 
 goodness of fit S are based on F^2^, conventional R-factors R are based 
 on F, with F set to zero for negative F^2^. The threshold expression of 
 F^2^ > 2sigma(F^2^) is used only for calculating R-factors(gt) etc. and is 
 not relevant to the choice of reflections for refinement.  R-factors based 
 on F^2^ are statistically about twice as large as those based on F, and R- 
 factors based on ALL data will be even larger. 

 The asymmetric unit contained two molecules.  Each of the molecules
 exhibited disorder of the arylcarboxylate binding by exchange of the mono
 and bi-dentate binding modes with a concomittant change in the orientation
 of the vinylidene.  The ratio of the two forms differed between
 the two molecules.  For one, the ratio refined to 0.878:0.122(18) and for
 the other to 0.9302:0.0698(15).  When modelling the disorderde, the ADP of
 corresponding pairs of atoms (eg C1 & C1a) were constrained to be equal.
 For the minor forms, the aromatic rings were constrained to be hexagonal,
 the para-methyl group restrained to be equidistant between the meta
 carbons and Cpara-C-methyl distance restrained to be 1.52 angstroms.
;
_atom_sites_solution_hydrogens   geom
_atom_sites_solution_primary     direct
_atom_sites_solution_secondary   difmap
loop_
_atom_site_label
_atom_site_type_symbol
_atom_site_fract_x
_atom_site_fract_y
_atom_site_fract_z
_atom_site_U_iso_or_equiv
_atom_site_adp_type
_atom_site_occupancy
_atom_site_symmetry_multiplicity
_atom_site_calc_flag
_atom_site_refinement_flags
_atom_site_disorder_assembly
_atom_site_disorder_group
C1 C 0.65545(19) 0.41565(16) 0.77976(16) 0.0190(7) Uani 0.8782(18) 1 d P A 1
C1A C 0.6477(15) 0.3825(14) 0.7934(13) 0.0190(7) Uani 0.1218(18) 1 d P A 2
C2 C 0.6028(3) 0.4435(2) 0.8020(3) 0.0201(11) Uani 0.8782(18) 1 d P A 1
C2A C 0.598(3) 0.4331(19) 0.811(3) 0.0201(11) Uani 0.1218(18) 1 d PG A 2
C3A C 0.618(3) 0.490(2) 0.825(3) 0.0278(12) Uani 0.1218(18) 1 d PG A 2
H3A H 0.6612 0.5026 0.8249 0.033 Uiso 0.1218(18) 1 calc PR A 2
C4A C 0.572(3) 0.5272(16) 0.838(3) 0.0278(12) Uani 0.1218(18) 1 d PG A 2
H4A H 0.5850 0.5651 0.8476 0.033 Uiso 0.1218(18) 1 calc PR A 2
C5A C 0.507(3) 0.5080(17) 0.838(3) 0.0231(11) Uani 0.1218(18) 1 d PG A 2
C6A C 0.487(2) 0.4514(19) 0.824(3) 0.0241(11) Uani 0.1218(18) 1 d PG A 2
H6A H 0.4436 0.4386 0.8233 0.029 Uiso 0.1218(18) 1 calc PR A 2
C7A C 0.533(3) 0.4139(15) 0.810(2) 0.0243(12) Uani 0.1218(18) 1 d PG A 2
H7A H 0.5198 0.3760 0.8007 0.029 Uiso 0.1218(18) 1 calc PR A 2
C3 C 0.6112(3) 0.5002(2) 0.8209(4) 0.0278(12) Uani 0.8782(18) 1 d P A 1
H3 H 0.6492 0.5211 0.8187 0.033 Uiso 0.8782(18) 1 calc PR A 1
C4 C 0.5626(4) 0.5256(2) 0.8432(4) 0.0278(12) Uani 0.8782(18) 1 d P A 1
H4 H 0.5692 0.5633 0.8570 0.033 Uiso 0.8782(18) 1 calc PR A 1
C5 C 0.5042(3) 0.49576(18) 0.8454(3) 0.0231(11) Uani 0.8782(18) 1 d P A 1
C6 C 0.4962(3) 0.4391(2) 0.8253(3) 0.0241(11) Uani 0.8782(18) 1 d P A 1
H6 H 0.4571 0.4184 0.8254 0.029 Uiso 0.8782(18) 1 calc PR A 1
C7 C 0.5458(3) 0.4133(2) 0.8050(3) 0.0243(12) Uani 0.8782(18) 1 d P A 1
H7 H 0.5405 0.3751 0.7932 0.029 Uiso 0.8782(18) 1 calc PR A 1
C8 C 0.45285(18) 0.52674(14) 0.86775(16) 0.0370(8) Uani 0.8782(18) 1 d P A 1
H8A H 0.4721 0.5281 0.9159 0.055 Uiso 0.8782(18) 1 d PR A 1
H8B H 0.4075 0.5072 0.8515 0.055 Uiso 0.8782(18) 1 d PR A 1
H8C H 0.4460 0.5647 0.8502 0.055 Uiso 0.8782(18) 1 d PR A 1
C8A C 0.45285(18) 0.52674(14) 0.86775(16) 0.0370(8) Uani 0.1218(18) 1 d P A 2
H8AA H 0.4777 0.5315 0.9154 0.055 Uiso 0.1218(18) 1 d PR A 2
H8AB H 0.4162 0.4983 0.8588 0.055 Uiso 0.1218(18) 1 d PR A 2
H8AC H 0.4311 0.5621 0.8479 0.055 Uiso 0.1218(18) 1 d PR A 2
C9 C 0.86489(19) 0.38712(16) 0.70115(16) 0.0247(8) Uani 0.8782(18) 1 d P A 1
C9A C 0.8540(15) 0.4234(12) 0.7160(13) 0.0247(8) Uani 0.1218(18) 1 d P A 2
C10 C 0.9128(2) 0.42996(16) 0.68617(19) 0.0224(9) Uani 0.8782(18) 1 d P A 1
C10A C 0.9158(18) 0.4465(12) 0.6977(16) 0.0224(9) Uani 0.1218(18) 1 d PG A 2
C11A C 0.9082(13) 0.5027(12) 0.6765(17) 0.0275(9) Uani 0.1218(18) 1 d PG A 2
H11A H 0.8704 0.5245 0.6777 0.033 Uiso 0.1218(18) 1 calc PR A 2
C12A C 0.9572(15) 0.5264(11) 0.653(2) 0.0298(10) Uani 0.1218(18) 1 d PGD A 2
H12A H 0.9522 0.5640 0.6393 0.036 Uiso 0.1218(18) 1 calc PR A 2
C13A C 1.014(2) 0.4938(14) 0.652(3) 0.0257(9) Uani 0.1218(18) 1 d PGD A 2
C14A C 1.021(3) 0.4376(15) 0.673(3) 0.0262(9) Uani 0.1218(18) 1 d PGD A 2
H14A H 1.0591 0.4158 0.6718 0.031 Uiso 0.1218(18) 1 calc PR A 2
C15A C 0.972(3) 0.4139(12) 0.696(2) 0.0257(10) Uani 0.1218(18) 1 d PG A 2
H15A H 0.9774 0.3763 0.7102 0.031 Uiso 0.1218(18) 1 calc PR A 2
C11 C 0.8932(2) 0.48604(16) 0.6684(2) 0.0275(9) Uani 0.8782(18) 1 d P A 1
H11 H 0.8504 0.5000 0.6689 0.033 Uiso 0.8782(18) 1 calc PR A 1
C12 C 0.9371(2) 0.52146(18) 0.6498(3) 0.0298(10) Uani 0.8782(18) 1 d P A 1
H12 H 0.9232 0.5588 0.6375 0.036 Uiso 0.8782(18) 1 calc PR A 1
C13 C 1.0017(3) 0.5017(2) 0.6493(4) 0.0257(9) Uani 0.8782(18) 1 d P A 1
C14 C 1.0215(4) 0.4463(2) 0.6690(4) 0.0262(9) Uani 0.8782(18) 1 d P A 1
H14 H 1.0653 0.4326 0.6706 0.031 Uiso 0.8782(18) 1 calc PR A 1
C15 C 0.9776(3) 0.4113(2) 0.6863(3) 0.0257(10) Uani 0.8782(18) 1 d P A 1
H15 H 0.9918 0.3739 0.6984 0.031 Uiso 0.8782(18) 1 calc PR A 1
C16 C 1.0484(3) 0.53889(18) 0.6270(2) 0.0405(12) Uani 0.8782(18) 1 d P A 1
H16A H 1.0290 0.5403 0.5789 0.061 Uiso 0.8782(18) 1 calc PR A 1
H16B H 1.0963 0.5236 0.6434 0.061 Uiso 0.8782(18) 1 calc PR A 1
H16C H 1.0496 0.5765 0.6445 0.061 Uiso 0.8782(18) 1 calc PR A 1
C16A C 1.059(2) 0.5169(14) 0.616(2) 0.0405(12) Uani 0.1218(18) 1 d PD A 2
H16D H 1.0337 0.5118 0.5681 0.061 Uiso 0.1218(18) 1 calc PR A 2
H16E H 1.1040 0.4967 0.6304 0.061 Uiso 0.1218(18) 1 calc PR A 2
H16F H 1.0682 0.5565 0.6254 0.061 Uiso 0.1218(18) 1 calc PR A 2
C17 C 0.77930(18) 0.29385(18) 0.74527(19) 0.0206(8) Uani 0.8782(18) 1 d P A 1
C17A C 0.7535(15) 0.2936(16) 0.7430(17) 0.0206(8) Uani 0.1218(18) 1 d P A 2
C18 C 0.79955(17) 0.24159(13) 0.74347(15) 0.0193(7) Uani 0.8782(18) 1 d P A 1
H18 H 0.8427 0.2366 0.7383 0.023 Uiso 0.8782(18) 1 calc PR A 1
C18A C 0.6941(12) 0.2466(9) 0.7509(11) 0.0193(7) Uani 0.1218(18) 1 d P A 2
H18A H 0.6515 0.2563 0.7550 0.023 Uiso 0.1218(18) 1 calc PR A 2
C19 C 0.7617(2) 0.18912(16) 0.74865(19) 0.0213(8) Uani 0.8782(18) 1 d P A 1
C20 C 0.7945(2) 0.13677(16) 0.7494(2) 0.0319(9) Uani 0.8782(18) 1 d P A 1
H20 H 0.8400 0.1355 0.7484 0.038 Uiso 0.8782(18) 1 calc PR A 1
C21 C 0.7597(3) 0.08690(18) 0.7515(3) 0.0399(11) Uani 0.8782(18) 1 d P A 1
H21 H 0.7823 0.0524 0.7520 0.048 Uiso 0.8782(18) 1 calc PR A 1
C22 C 0.6930(3) 0.08715(19) 0.7529(3) 0.0472(13) Uani 0.8782(18) 1 d P A 1
H22 H 0.6701 0.0532 0.7540 0.057 Uiso 0.8782(18) 1 calc PR A 1
C23 C 0.6596(3) 0.1390(2) 0.7525(3) 0.0422(11) Uani 0.8782(18) 1 d P A 1
H23 H 0.6142 0.1397 0.7537 0.051 Uiso 0.8782(18) 1 calc PR A 1
C24 C 0.6935(2) 0.18873(17) 0.7504(2) 0.0328(10) Uani 0.8782(18) 1 d P A 1
H24 H 0.6706 0.2230 0.7501 0.039 Uiso 0.8782(18) 1 calc PR A 1
C24A C 0.7188(13) 0.1896(10) 0.7504(15) 0.0328(10) Uani 0.1218(18) 1 d PG A 2
C19A C 0.7866(13) 0.1882(9) 0.7483(13) 0.0213(8) Uani 0.1218(18) 1 d PG A 2
H19A H 0.8097 0.2219 0.7465 0.026 Uiso 0.1218(18) 1 calc PR A 2
C20A C 0.8199(11) 0.1364(11) 0.7490(15) 0.0319(9) Uani 0.1218(18) 1 d PG A 2
H20A H 0.8653 0.1355 0.7477 0.038 Uiso 0.1218(18) 1 calc PR A 2
C21A C 0.7855(16) 0.0860(9) 0.7518(17) 0.0399(11) Uani 0.1218(18) 1 d PG A 2
H21A H 0.8077 0.0514 0.7523 0.048 Uiso 0.1218(18) 1 calc PR A 2
C22A C 0.7177(16) 0.0874(10) 0.7539(18) 0.0472(13) Uani 0.1218(18) 1 d PG A 2
H22A H 0.6946 0.0536 0.7558 0.057 Uiso 0.1218(18) 1 calc PR A 2
C23A C 0.6844(12) 0.1392(13) 0.7532(19) 0.0422(11) Uani 0.1218(18) 1 d PG A 2
H23A H 0.6390 0.1401 0.7546 0.051 Uiso 0.1218(18) 1 calc PR A 2
C25 C 0.92826(15) 0.37576(12) 0.87180(13) 0.0204(6) Uani 1 1 d . . .
C26 C 0.96734(16) 0.42371(13) 0.90238(15) 0.0297(7) Uani 1 1 d . . .
H26 H 0.9471 0.4505 0.9212 0.036 Uiso 1 1 calc R . .
C27 C 1.03628(17) 0.43199(14) 0.90512(16) 0.0355(8) Uani 1 1 d . . .
H27 H 1.0616 0.4646 0.9250 0.043 Uiso 1 1 calc R . .
C28 C 1.06752(16) 0.39207(14) 0.87857(15) 0.0320(8) Uani 1 1 d . . .
H28 H 1.1139 0.3976 0.8807 0.038 Uiso 1 1 calc R . .
C29 C 1.02958(16) 0.34387(14) 0.84887(14) 0.0265(7) Uani 1 1 d . . .
H29 H 1.0507 0.3165 0.8315 0.032 Uiso 1 1 calc R . .
C30 C 0.96009(15) 0.33610(13) 0.84485(13) 0.0232(7) Uani 1 1 d . . .
H30 H 0.9344 0.3039 0.8238 0.028 Uiso 1 1 calc R . .
C31 C 0.83379(16) 0.30140(12) 0.90702(13) 0.0220(6) Uani 1 1 d . . .
C32 C 0.89493(16) 0.26793(13) 0.93943(14) 0.0274(7) Uani 1 1 d . . .
H32 H 0.9389 0.2787 0.9388 0.033 Uiso 1 1 calc R . .
C33 C 0.89001(17) 0.21886(13) 0.97243(15) 0.0308(7) Uani 1 1 d . . .
H33 H 0.9307 0.1965 0.9934 0.037 Uiso 1 1 calc R . .
C34 C 0.82594(18) 0.20278(14) 0.97456(15) 0.0363(8) Uani 1 1 d . . .
H34 H 0.8232 0.1697 0.9969 0.044 Uiso 1 1 calc R . .
C35 C 0.76520(18) 0.23581(15) 0.94349(16) 0.0424(9) Uani 1 1 d . . .
H35 H 0.7219 0.2254 0.9458 0.051 Uiso 1 1 calc R . .
C36 C 0.76880(16) 0.28394(14) 0.90911(15) 0.0339(8) Uani 1 1 d . . .
H36 H 0.7274 0.3052 0.8869 0.041 Uiso 1 1 calc R . .
C37 C 0.82000(15) 0.42349(13) 0.91070(14) 0.0250(7) Uani 1 1 d . . .
C38 C 0.81210(16) 0.47854(13) 0.88392(16) 0.0323(8) Uani 1 1 d . . .
H38 H 0.8129 0.4842 0.8418 0.039 Uiso 1 1 calc R . .
C39 C 0.80316(18) 0.52417(16) 0.91937(19) 0.0459(10) Uani 1 1 d . . .
H39 H 0.7990 0.5606 0.9017 0.055 Uiso 1 1 calc R . .
C40 C 0.80046(19) 0.51584(19) 0.9807(2) 0.0555(12) Uani 1 1 d . . .
H40 H 0.7930 0.5467 1.0040 0.067 Uiso 1 1 calc R . .
C41 C 0.80860(18) 0.46247(19) 1.00865(18) 0.0510(11) Uani 1 1 d . . .
H41 H 0.8077 0.4576 1.0508 0.061 Uiso 1 1 calc R . .
C42 C 0.81826(16) 0.41551(15) 0.97360(15) 0.0353(8) Uani 1 1 d . . .
H42 H 0.8235 0.3793 0.9921 0.042 Uiso 1 1 calc R . .
C43 C 0.66827(15) 0.29525(12) 0.58844(13) 0.0199(6) Uani 1 1 d . . .
C44 C 0.73161(16) 0.27942(13) 0.58183(14) 0.0267(7) Uani 1 1 d . . .
H44 H 0.7724 0.3021 0.6002 0.032 Uiso 1 1 calc R . .
C45 C 0.73427(17) 0.23006(13) 0.54804(14) 0.0315(8) Uani 1 1 d . . .
H45 H 0.7763 0.2206 0.5426 0.038 Uiso 1 1 calc R . .
C46 C 0.67517(17) 0.19510(13) 0.52251(14) 0.0300(7) Uani 1 1 d . . .
H46 H 0.6775 0.1617 0.5005 0.036 Uiso 1 1 calc R . .
C47 C 0.61238(17) 0.20958(13) 0.52960(14) 0.0292(7) Uani 1 1 d . . .
H47 H 0.5725 0.1858 0.5125 0.035 Uiso 1 1 calc R . .
C48 C 0.60857(16) 0.25922(12) 0.56191(14) 0.0247(7) Uani 1 1 d . . .
H48 H 0.5659 0.2688 0.5661 0.030 Uiso 1 1 calc R . .
C49 C 0.68336(15) 0.41667(12) 0.58160(14) 0.0235(6) Uani 1 1 d . . .
C50 C 0.68103(16) 0.40693(14) 0.51779(14) 0.0295(7) Uani 1 1 d . . .
H50 H 0.6733 0.3704 0.5001 0.035 Uiso 1 1 calc R . .
C51 C 0.69009(17) 0.45145(16) 0.48029(17) 0.0390(9) Uani 1 1 d . . .
H51 H 0.6871 0.4447 0.4370 0.047 Uiso 1 1 calc R . .
C52 C 0.70336(17) 0.50489(16) 0.50576(18) 0.0406(9) Uani 1 1 d . . .
H52 H 0.7111 0.5342 0.4807 0.049 Uiso 1 1 calc R . .
C53 C 0.70532(18) 0.51576(14) 0.56963(18) 0.0405(9) Uani 1 1 d . . .
H53 H 0.7131 0.5525 0.5867 0.049 Uiso 1 1 calc R . .
C54 C 0.69568(16) 0.47155(13) 0.60793(16) 0.0307(7) Uani 1 1 d . . .
H54 H 0.6974 0.4786 0.6507 0.037 Uiso 1 1 calc R . .
C55 C 0.57431(15) 0.37130(12) 0.62088(14) 0.0226(6) Uani 1 1 d . . .
C56 C 0.53341(17) 0.41580(13) 0.58338(16) 0.0342(8) Uani 1 1 d . . .
H56 H 0.5528 0.4400 0.5611 0.041 Uiso 1 1 calc R . .
C57 C 0.46374(18) 0.42473(15) 0.57862(18) 0.0442(9) Uani 1 1 d . . .
H57 H 0.4371 0.4551 0.5537 0.053 Uiso 1 1 calc R . .
C58 C 0.43398(18) 0.38888(14) 0.61061(17) 0.0369(8) Uani 1 1 d . . .
H58 H 0.3874 0.3952 0.6077 0.044 Uiso 1 1 calc R . .
C59 C 0.47346(16) 0.34332(14) 0.64724(14) 0.0296(7) Uani 1 1 d . . .
H59 H 0.4532 0.3184 0.6681 0.036 Uiso 1 1 calc R . .
C60 C 0.54314(15) 0.33512(13) 0.65262(13) 0.0243(7) Uani 1 1 d . . .
H60 H 0.5698 0.3049 0.6779 0.029 Uiso 1 1 calc R . .
O1 O 0.69349(12) 0.44539(10) 0.75697(11) 0.0206(5) Uani 0.8782(18) 1 d P A 1
O1A O 0.6845(10) 0.4122(9) 0.7704(9) 0.0206(5) Uani 0.1218(18) 1 d P A 2
O2 O 0.66533(12) 0.36150(9) 0.78337(11) 0.0178(5) Uani 0.8782(18) 1 d P A 1
O2A O 0.6361(8) 0.3381(6) 0.8064(7) 0.0178(5) Uani 0.1218(18) 1 d P A 2
O3 O 0.82094(13) 0.41017(12) 0.72258(11) 0.0278(6) Uani 0.8782(18) 1 d P A 1
O3A O 0.8192(9) 0.4528(8) 0.7417(8) 0.0278(6) Uani 0.1218(18) 1 d P A 2
O4 O 0.87150(13) 0.33662(10) 0.69198(12) 0.0312(6) Uani 0.8782(18) 1 d P A 1
O4A O 0.8372(11) 0.3650(8) 0.7118(10) 0.0312(6) Uani 0.1218(18) 1 d P A 2
P1 P 0.83463(4) 0.36621(3) 0.86128(3) 0.01835(16) Uani 1 1 d . A .
P2 P 0.66834(4) 0.36099(3) 0.63315(3) 0.01786(16) Uani 1 1 d . A .
Ru1 Ru 0.750479(12) 0.365674(9) 0.747957(11) 0.01677(6) Uani 1 1 d . . .
C120 C 0.37340(14) 0.20538(12) 0.98598(13) 0.0207(6) Uani 1 1 d . . .
H120 H 0.3871 0.2422 1.0014 0.025 Uiso 1 1 calc R . .
C61 C 0.33290(18) 0.18886(15) 0.70318(16) 0.0185(7) Uani 0.9308(15) 1 d P B 1
C61A C 0.336(2) 0.218(2) 0.674(2) 0.0185(7) Uani 0.0692(15) 1 d P B 2
C62 C 0.38284(19) 0.16266(15) 0.67678(16) 0.0204(8) Uani 0.9308(15) 1 d P B 1
C62A C 0.387(3) 0.175(2) 0.661(3) 0.0204(8) Uani 0.0692(15) 1 d PG B 2
C67A C 0.413(4) 0.125(2) 0.697(3) 0.0306(10) Uani 0.0692(15) 1 d PG B 2
H67A H 0.3986 0.1142 0.7307 0.037 Uiso 0.0692(15) 1 calc PR B 2
C66A C 0.462(5) 0.092(3) 0.683(4) 0.0353(13) Uani 0.0692(15) 1 d PGD B 2
H66A H 0.4801 0.0587 0.7065 0.042 Uiso 0.0692(15) 1 calc PR B 2
C65A C 0.484(5) 0.108(3) 0.632(4) 0.0302(8) Uani 0.0692(15) 1 d PGD B 2
C64A C 0.458(4) 0.158(2) 0.596(3) 0.0296(9) Uani 0.0692(15) 1 d PGD B 2
H64A H 0.4724 0.1690 0.5625 0.036 Uiso 0.0692(15) 1 calc PR B 2
C63A C 0.409(3) 0.1912(19) 0.611(2) 0.0254(8) Uani 0.0692(15) 1 d PG B 2
H63A H 0.3909 0.2244 0.5867 0.031 Uiso 0.0692(15) 1 calc PR B 2
C63 C 0.4041(2) 0.19154(16) 0.63197(18) 0.0254(8) Uani 0.9308(15) 1 d P B 1
H63 H 0.3861 0.2277 0.6174 0.031 Uiso 0.9308(15) 1 calc PR B 1
C64 C 0.4521(3) 0.16677(18) 0.6087(2) 0.0296(9) Uani 0.9308(15) 1 d P B 1
H64 H 0.4663 0.1868 0.5792 0.036 Uiso 0.9308(15) 1 calc PR B 1
C65 C 0.4792(4) 0.1127(3) 0.6287(3) 0.0302(8) Uani 0.9308(15) 1 d P B 1
C66 C 0.4575(4) 0.0841(2) 0.6733(3) 0.0353(13) Uani 0.9308(15) 1 d P B 1
H66 H 0.4750 0.0477 0.6874 0.042 Uiso 0.9308(15) 1 calc PR B 1
C67 C 0.4102(3) 0.10852(15) 0.6975(2) 0.0306(10) Uani 0.9308(15) 1 d P B 1
H67 H 0.3966 0.0887 0.7276 0.037 Uiso 0.9308(15) 1 calc PR B 1
C68 C 0.5298(4) 0.0857(2) 0.6015(4) 0.0450(13) Uani 0.9308(15) 1 d P B 1
H68A H 0.5037 0.0759 0.5552 0.067 Uiso 0.9308(15) 1 calc PR B 1
H68B H 0.5504 0.0520 0.6267 0.067 Uiso 0.9308(15) 1 calc PR B 1
H68C H 0.5675 0.1119 0.6053 0.067 Uiso 0.9308(15) 1 calc PR B 1
C68A C 0.534(7) 0.070(4) 0.613(6) 0.0450(13) Uani 0.0692(15) 1 d PD B 2
H68D H 0.5563 0.0916 0.5889 0.067 Uiso 0.0692(15) 1 calc PR B 2
H68E H 0.5058 0.0398 0.5841 0.067 Uiso 0.0692(15) 1 calc PR B 2
H68F H 0.5698 0.0538 0.6523 0.067 Uiso 0.0692(15) 1 calc PR B 2
C69 C 0.15906(16) 0.21777(14) 0.82613(15) 0.0212(7) Uani 0.9308(15) 1 d P B 1
C69A C 0.164(2) 0.183(2) 0.794(2) 0.0212(7) Uani 0.0692(15) 1 d PD B 2
C70 C 0.10865(17) 0.17799(16) 0.83947(19) 0.0216(7) Uani 0.9308(15) 1 d P B 1
C70A C 0.1099(19) 0.159(2) 0.820(2) 0.0216(7) Uani 0.0692(15) 1 d PGD B 2
C71A C 0.071(3) 0.109(2) 0.800(2) 0.0259(9) Uani 0.0692(15) 1 d PG B 2
H71A H 0.0786 0.0857 0.7683 0.031 Uiso 0.0692(15) 1 calc PR B 2
C72A C 0.021(3) 0.0933(17) 0.826(3) 0.0303(10) Uani 0.0692(15) 1 d PG B 2
H72A H -0.0050 0.0598 0.8117 0.036 Uiso 0.0692(15) 1 calc PR B 2
C73A C 0.010(3) 0.128(2) 0.872(3) 0.0272(10) Uani 0.0692(15) 1 d PG B 2
C74A C 0.049(3) 0.178(2) 0.893(2) 0.0305(9) Uani 0.0692(15) 1 d PG B 2
H74A H 0.0410 0.2012 0.9246 0.037 Uiso 0.0692(15) 1 calc PR B 2
C75A C 0.099(2) 0.1935(14) 0.867(2) 0.0286(8) Uani 0.0692(15) 1 d PG B 2
H75A H 0.1247 0.2270 0.8812 0.034 Uiso 0.0692(15) 1 calc PR B 2
C71 C 0.0857(2) 0.12737(17) 0.80456(19) 0.0259(9) Uani 0.9308(15) 1 d P B 1
H71 H 0.1033 0.1165 0.7727 0.031 Uiso 0.9308(15) 1 calc PR B 1
C72 C 0.0365(2) 0.09282(17) 0.8171(2) 0.0303(10) Uani 0.9308(15) 1 d P B 1
H72 H 0.0219 0.0589 0.7937 0.036 Uiso 0.9308(15) 1 calc PR B 1
C73 C 0.0088(2) 0.10842(16) 0.86397(19) 0.0272(10) Uani 0.9308(15) 1 d P B 1
C74 C 0.0312(2) 0.15944(18) 0.89740(18) 0.0305(9) Uani 0.9308(15) 1 d P B 1
H74 H 0.0126 0.1709 0.9283 0.037 Uiso 0.9308(15) 1 calc PR B 1
C75 C 0.0805(2) 0.19362(15) 0.88590(18) 0.0286(8) Uani 0.9308(15) 1 d P B 1
H75 H 0.0950 0.2275 0.9095 0.034 Uiso 0.9308(15) 1 calc PR B 1
C76 C -0.0428(2) 0.07061(17) 0.8791(2) 0.0421(10) Uani 0.9308(15) 1 d P B 1
H76A H -0.0813 0.0931 0.8815 0.063 Uiso 0.9308(15) 1 calc PR B 1
H76B H -0.0180 0.0518 0.9212 0.063 Uiso 0.9308(15) 1 calc PR B 1
H76C H -0.0622 0.0428 0.8442 0.063 Uiso 0.9308(15) 1 calc PR B 1
C76A C -0.047(3) 0.100(2) 0.895(3) 0.0421(10) Uani 0.0692(15) 1 d P B 2
H76D H -0.0764 0.0742 0.8611 0.063 Uiso 0.0692(15) 1 calc PR B 2
H76E H -0.0761 0.1286 0.9029 0.063 Uiso 0.0692(15) 1 calc PR B 2
H76F H -0.0221 0.0790 0.9362 0.063 Uiso 0.0692(15) 1 calc PR B 2
C77 C 0.22545(16) 0.31135(13) 0.75660(13) 0.0191(6) Uani 0.9308(15) 1 d P B 1
C77A C 0.276(2) 0.3078(17) 0.7402(18) 0.0191(6) Uani 0.0692(15) 1 d P B 2
C78 C 0.20886(17) 0.36381(13) 0.76469(15) 0.0227(7) Uani 0.9308(15) 1 d P B 1
H78 H 0.1747 0.3684 0.7830 0.027 Uiso 0.9308(15) 1 calc PR B 1
C78A C 0.296(2) 0.3639(17) 0.728(2) 0.0227(7) Uani 0.0692(15) 1 d P B 2
H78A H 0.3302 0.3645 0.7088 0.027 Uiso 0.0692(15) 1 calc PR B 2
C79 C 0.23783(18) 0.41638(14) 0.74830(16) 0.0234(7) Uani 0.9308(15) 1 d P B 1
C80 C 0.2874(2) 0.41627(15) 0.71829(17) 0.0335(9) Uani 0.9308(15) 1 d P B 1
H80 H 0.3044 0.3819 0.7093 0.040 Uiso 0.9308(15) 1 calc PR B 1
C80A C 0.273(2) 0.4186(14) 0.7395(19) 0.0335(9) Uani 0.0692(15) 1 d PG B 2
C81A C 0.296(2) 0.4703(18) 0.724(2) 0.0418(10) Uani 0.0692(15) 1 d PG B 2
H81A H 0.3283 0.4710 0.7030 0.050 Uiso 0.0692(15) 1 calc PR B 2
C82A C 0.270(2) 0.5208(14) 0.739(2) 0.0472(11) Uani 0.0692(15) 1 d PG B 2
H82A H 0.2857 0.5554 0.7287 0.057 Uiso 0.0692(15) 1 calc PR B 2
C83A C 0.222(2) 0.5197(12) 0.770(2) 0.0384(10) Uani 0.0692(15) 1 d PG B 2
H83A H 0.2049 0.5536 0.7804 0.046 Uiso 0.0692(15) 1 calc PR B 2
C84A C 0.1993(19) 0.4681(15) 0.7858(19) 0.0337(9) Uani 0.0692(15) 1 d PG B 2
H84A H 0.1669 0.4673 0.8066 0.040 Uiso 0.0692(15) 1 calc PR B 2
C79A C 0.225(2) 0.4175(12) 0.7705(18) 0.0234(7) Uani 0.0692(15) 1 d PG B 2
H79A H 0.2096 0.3829 0.7810 0.028 Uiso 0.0692(15) 1 calc PR B 2
C81 C 0.3116(2) 0.46668(17) 0.70162(18) 0.0418(10) Uani 0.9308(15) 1 d P B 1
H81 H 0.3445 0.4659 0.6814 0.050 Uiso 0.9308(15) 1 calc PR B 1
C82 C 0.2872(2) 0.51800(16) 0.7148(2) 0.0472(11) Uani 0.9308(15) 1 d P B 1
H82 H 0.3027 0.5517 0.7026 0.057 Uiso 0.9308(15) 1 calc PR B 1
C83 C 0.2400(2) 0.51920(16) 0.7460(2) 0.0384(10) Uani 0.9308(15) 1 d P B 1
H83 H 0.2246 0.5538 0.7562 0.046 Uiso 0.9308(15) 1 calc PR B 1
C84 C 0.2151(2) 0.46903(14) 0.76244(18) 0.0337(9) Uani 0.9308(15) 1 d P B 1
H84 H 0.1828 0.4704 0.7832 0.040 Uiso 0.9308(15) 1 calc PR B 1
C85 C 0.15532(14) 0.18310(12) 0.58360(13) 0.0188(6) Uani 1 1 d . . .
C86 C 0.17203(15) 0.12778(12) 0.60688(14) 0.0211(6) Uani 1 1 d . . .
H86 H 0.1859 0.1199 0.6523 0.025 Uiso 1 1 calc R . .
C87 C 0.16810(15) 0.08445(12) 0.56258(14) 0.0242(7) Uani 1 1 d . . .
H87 H 0.1790 0.0475 0.5784 0.029 Uiso 1 1 calc R . .
C88 C 0.14815(16) 0.09554(13) 0.49512(15) 0.0274(7) Uani 1 1 d . . .
H88 H 0.1454 0.0662 0.4655 0.033 Uiso 1 1 calc R . .
C89 C 0.13233(16) 0.15041(13) 0.47196(14) 0.0270(7) Uani 1 1 d . . .
H89 H 0.1194 0.1581 0.4266 0.032 Uiso 1 1 calc R . .
C90 C 0.13540(15) 0.19432(13) 0.51549(14) 0.0229(6) Uani 1 1 d . . .
H90 H 0.1242 0.2312 0.4993 0.027 Uiso 1 1 calc R . .
C91 C 0.06469(14) 0.22598(11) 0.64544(13) 0.0177(6) Uani 1 1 d . . .
C92 C 0.01540(15) 0.18791(12) 0.60309(13) 0.0213(6) Uani 1 1 d . . .
H92 H 0.0267 0.1678 0.5716 0.026 Uiso 1 1 calc R . .
C93 C -0.05071(16) 0.17942(12) 0.60712(14) 0.0258(7) Uani 1 1 d . . .
H93 H -0.0835 0.1538 0.5784 0.031 Uiso 1 1 calc R . .
C94 C -0.06782(15) 0.20901(13) 0.65372(14) 0.0250(7) Uani 1 1 d . . .
H94 H -0.1119 0.2031 0.6568 0.030 Uiso 1 1 calc R . .
C95 C -0.01915(15) 0.24742(13) 0.69580(14) 0.0248(7) Uani 1 1 d . . .
H95 H -0.0307 0.2674 0.7271 0.030 Uiso 1 1 calc R . .
C96 C 0.04646(15) 0.25633(12) 0.69174(13) 0.0209(6) Uani 1 1 d . . .
H96 H 0.0786 0.2826 0.7199 0.025 Uiso 1 1 calc R . .
C97 C 0.14375(15) 0.30439(12) 0.59713(12) 0.0197(6) Uani 1 1 d . . .
C98 C 0.08311(17) 0.33802(12) 0.57845(14) 0.0274(7) Uani 1 1 d . . .
H98 H 0.0437 0.3258 0.5869 0.033 Uiso 1 1 calc R . .
C99 C 0.0804(2) 0.38996(13) 0.54715(15) 0.0355(8) Uani 1 1 d . . .
H99 H 0.0396 0.4127 0.5353 0.043 Uiso 1 1 calc R . .
C100 C 0.1383(2) 0.40777(13) 0.53365(15) 0.0369(9) Uani 1 1 d . . .
H100 H 0.1369 0.4427 0.5133 0.044 Uiso 1 1 calc R . .
C101 C 0.19796(19) 0.37373(14) 0.55039(15) 0.0357(8) Uani 1 1 d . . .
H101 H 0.2363 0.3853 0.5399 0.043 Uiso 1 1 calc R . .
C102 C 0.20169(17) 0.32243(13) 0.58270(14) 0.0295(7) Uani 1 1 d . . .
H102 H 0.2428 0.3000 0.5948 0.035 Uiso 1 1 calc R . .
C103 C 0.43786(14) 0.23381(11) 0.85225(13) 0.0161(6) Uani 1 1 d . . .
C104 C 0.45676(15) 0.26457(12) 0.80688(13) 0.0212(6) Uani 1 1 d . . .
H104 H 0.4249 0.2912 0.7790 0.025 Uiso 1 1 calc R . .
C105 C 0.52285(16) 0.25574(13) 0.80302(14) 0.0249(7) Uani 1 1 d . . .
H105 H 0.5349 0.2762 0.7723 0.030 Uiso 1 1 calc R . .
C106 C 0.57088(15) 0.21672(13) 0.84448(14) 0.0243(7) Uani 1 1 d . . .
H106 H 0.6151 0.2109 0.8417 0.029 Uiso 1 1 calc R . .
C107 C 0.55313(15) 0.18636(12) 0.89003(14) 0.0247(7) Uani 1 1 d . . .
H107 H 0.5855 0.1602 0.9182 0.030 Uiso 1 1 calc R . .
C108 C 0.48677(15) 0.19481(12) 0.89399(13) 0.0214(6) Uani 1 1 d . . .
H108 H 0.4751 0.1742 0.9248 0.026 Uiso 1 1 calc R . .
C109 C 0.36410(15) 0.31418(11) 0.90154(13) 0.0189(6) Uani 1 1 d . . .
C110 C 0.30791(16) 0.33676(13) 0.91559(14) 0.0273(7) Uani 1 1 d . . .
H110 H 0.2647 0.3171 0.9031 0.033 Uiso 1 1 calc R . .
C111 C 0.31648(18) 0.38848(13) 0.94814(15) 0.0331(8) Uani 1 1 d . . .
H111 H 0.2789 0.4033 0.9576 0.040 Uiso 1 1 calc R . .
C112 C 0.38023(18) 0.41824(13) 0.96676(14) 0.0319(8) Uani 1 1 d . . .
H112 H 0.3853 0.4532 0.9881 0.038 Uiso 1 1 calc R . .
C113 C 0.43649(18) 0.39606(13) 0.95372(14) 0.0283(7) Uani 1 1 d . . .
H113 H 0.4797 0.4158 0.9666 0.034 Uiso 1 1 calc R . .
C114 C 0.42833(16) 0.34418(12) 0.92128(13) 0.0221(6) Uani 1 1 d . . .
H114 H 0.4664 0.3293 0.9126 0.026 Uiso 1 1 calc R . .
C115 C 0.34897(14) 0.19376(12) 0.91768(13) 0.0172(6) Uani 1 1 d . . .
C116 C 0.32804(15) 0.13852(12) 0.89533(13) 0.0206(6) Uani 1 1 d . . .
H116 H 0.3109 0.1302 0.8498 0.025 Uiso 1 1 calc R . .
C117 C 0.33283(15) 0.09580(12) 0.94116(13) 0.0238(7) Uani 1 1 d . . .
H117 H 0.3192 0.0589 0.9261 0.029 Uiso 1 1 calc R . .
C118 C 0.35774(15) 0.10785(13) 1.00887(14) 0.0249(7) Uani 1 1 d . . .
H118 H 0.3612 0.0791 1.0394 0.030 Uiso 1 1 calc R . .
C119 C 0.37751(15) 0.16280(13) 1.03118(14) 0.0240(7) Uani 1 1 d . . .
H119 H 0.3936 0.1711 1.0767 0.029 Uiso 1 1 calc R . .
O5 O 0.31846(11) 0.24217(9) 0.69508(10) 0.0179(5) Uani 0.9308(15) 1 d P B 1
O5A O 0.3329(14) 0.2662(11) 0.6516(12) 0.0179(5) Uani 0.0692(15) 1 d P B 2
O6 O 0.30418(11) 0.15994(9) 0.73510(9) 0.0183(5) Uani 0.9308(15) 1 d P B 1
O6A O 0.3101(18) 0.1967(17) 0.7114(17) 0.0183(5) Uani 0.0692(15) 1 d P B 2
O7 O 0.18952(11) 0.19700(10) 0.78879(11) 0.0202(5) Uani 0.9308(15) 1 d P B 1
O7A O 0.1914(14) 0.1578(12) 0.7647(13) 0.0202(5) Uani 0.0692(15) 1 d P B 2
O8 O 0.16673(12) 0.26690(9) 0.84780(11) 0.0277(5) Uani 0.9308(15) 1 d P B 1
O8A O 0.1856(17) 0.2390(14) 0.8024(15) 0.0277(5) Uani 0.0692(15) 1 d P B 2
P3 P 0.15273(4) 0.23746(3) 0.64260(3) 0.01595(15) Uani 1 1 d . B .
P4 P 0.35007(4) 0.24619(3) 0.85658(3) 0.01497(15) Uani 1 1 d . B .
Ru2 Ru 0.250649(12) 0.239331(9) 0.749244(10) 0.01370(6) Uani 1 1 d . . .

loop_
_atom_site_aniso_label
_atom_site_aniso_U_11
_atom_site_aniso_U_22
_atom_site_aniso_U_33
_atom_site_aniso_U_23
_atom_site_aniso_U_13
_atom_site_aniso_U_12
C1 0.0162(19) 0.023(2) 0.0135(16) 0.0000(15) 0.0010(13) -0.0028(16)
C1A 0.0162(19) 0.023(2) 0.0135(16) 0.0000(15) 0.0010(13) -0.0028(16)
C2 0.0199(18) 0.024(3) 0.014(2) -0.0006(18) 0.0050(14) 0.0030(19)
C2A 0.0199(18) 0.024(3) 0.014(2) -0.0006(18) 0.0050(14) 0.0030(19)
C3A 0.024(2) 0.025(3) 0.037(2) -0.002(2) 0.0140(19) 0.002(2)
C4A 0.029(3) 0.0243(18) 0.033(2) -0.0040(15) 0.0150(18) 0.0015(16)
C5A 0.0242(18) 0.027(3) 0.018(2) 0.008(2) 0.0087(15) 0.008(2)
C6A 0.026(2) 0.023(3) 0.0239(16) 0.001(2) 0.0107(18) -0.0016(19)
C7A 0.030(3) 0.0229(17) 0.0197(19) -0.0019(14) 0.0094(16) 0.0005(16)
C3 0.024(2) 0.025(3) 0.037(2) -0.002(2) 0.0140(19) 0.002(2)
C4 0.029(3) 0.0243(18) 0.033(2) -0.0040(15) 0.0150(18) 0.0015(16)
C5 0.0242(18) 0.027(3) 0.018(2) 0.008(2) 0.0087(15) 0.008(2)
C6 0.026(2) 0.023(3) 0.0239(16) 0.001(2) 0.0107(18) -0.0016(19)
C7 0.030(3) 0.0229(17) 0.0197(19) -0.0019(14) 0.0094(16) 0.0005(16)
C8 0.034(2) 0.042(2) 0.0389(19) -0.0050(16) 0.0188(17) 0.0082(16)
C8A 0.034(2) 0.042(2) 0.0389(19) -0.0050(16) 0.0188(17) 0.0082(16)
C9 0.021(2) 0.029(2) 0.0168(16) -0.0027(16) -0.0003(14) 0.0074(16)
C9A 0.021(2) 0.029(2) 0.0168(16) -0.0027(16) -0.0003(14) 0.0074(16)
C10 0.0209(18) 0.028(2) 0.0134(19) -0.0012(16) 0.0020(15) -0.0078(18)
C10A 0.0209(18) 0.028(2) 0.0134(19) -0.0012(16) 0.0020(15) -0.0078(18)
C11A 0.018(2) 0.034(3) 0.028(2) -0.005(2) 0.0072(17) -0.0022(16)
C12A 0.031(3) 0.0207(18) 0.0345(19) 0.0037(16) 0.010(2) 0.0002(18)
C13A 0.018(3) 0.031(2) 0.0253(17) 0.0066(17) 0.006(2) -0.0026(16)
C14A 0.0248(18) 0.032(3) 0.0219(18) 0.0012(19) 0.0087(14) 0.0031(18)
C15A 0.033(2) 0.0214(17) 0.018(2) -0.0004(15) 0.0049(16) 0.0003(14)
C11 0.018(2) 0.034(3) 0.028(2) -0.005(2) 0.0072(17) -0.0022(16)
C12 0.031(3) 0.0207(18) 0.0345(19) 0.0037(16) 0.010(2) 0.0002(18)
C13 0.018(3) 0.031(2) 0.0253(17) 0.0066(17) 0.006(2) -0.0026(16)
C14 0.0248(18) 0.032(3) 0.0219(18) 0.0012(19) 0.0087(14) 0.0031(18)
C15 0.033(2) 0.0214(17) 0.018(2) -0.0004(15) 0.0049(16) 0.0003(14)
C16 0.034(3) 0.049(3) 0.042(3) 0.016(3) 0.0176(19) -0.005(2)
C16A 0.034(3) 0.049(3) 0.042(3) 0.016(3) 0.0176(19) -0.005(2)
C17 0.009(2) 0.0346(19) 0.0176(15) -0.0032(14) 0.0041(18) -0.003(2)
C17A 0.009(2) 0.0346(19) 0.0176(15) -0.0032(14) 0.0041(18) -0.003(2)
C18 0.0194(17) 0.0176(17) 0.0214(16) -0.0012(14) 0.0087(14) 0.0037(13)
C18A 0.0194(17) 0.0176(17) 0.0214(16) -0.0012(14) 0.0087(14) 0.0037(13)
C19 0.025(2) 0.0195(16) 0.0194(15) -0.0003(13) 0.0088(17) 0.0057(15)
C20 0.037(3) 0.029(2) 0.0372(19) 0.0023(16) 0.022(2) 0.0049(19)
C21 0.060(4) 0.024(2) 0.047(2) 0.0055(17) 0.034(3) 0.003(2)
C22 0.073(4) 0.029(2) 0.056(3) -0.0063(19) 0.042(3) -0.017(2)
C23 0.044(3) 0.046(2) 0.053(2) -0.012(2) 0.036(3) -0.012(2)
C24 0.034(3) 0.030(2) 0.041(2) -0.0067(17) 0.021(2) -0.001(2)
C24A 0.034(3) 0.030(2) 0.041(2) -0.0067(17) 0.021(2) -0.001(2)
C19A 0.025(2) 0.0195(16) 0.0194(15) -0.0003(13) 0.0088(17) 0.0057(15)
C20A 0.037(3) 0.029(2) 0.0372(19) 0.0023(16) 0.022(2) 0.0049(19)
C21A 0.060(4) 0.024(2) 0.047(2) 0.0055(17) 0.034(3) 0.003(2)
C22A 0.073(4) 0.029(2) 0.056(3) -0.0063(19) 0.042(3) -0.017(2)
C23A 0.044(3) 0.046(2) 0.053(2) -0.012(2) 0.036(3) -0.012(2)
C25 0.0177(16) 0.0240(16) 0.0175(14) 0.0030(12) 0.0050(12) 0.0008(12)
C26 0.0216(17) 0.0266(18) 0.0398(18) -0.0047(15) 0.0110(15) -0.0017(13)
C27 0.0226(18) 0.0315(19) 0.049(2) -0.0078(16) 0.0099(16) -0.0089(14)
C28 0.0139(16) 0.044(2) 0.0365(18) 0.0095(16) 0.0081(14) 0.0015(14)
C29 0.0208(17) 0.039(2) 0.0191(14) 0.0028(14) 0.0078(13) 0.0045(14)
C30 0.0221(17) 0.0297(17) 0.0181(14) 0.0011(13) 0.0082(13) -0.0009(13)
C31 0.0225(16) 0.0281(17) 0.0145(13) 0.0016(12) 0.0065(12) -0.0007(13)
C32 0.0235(17) 0.0350(19) 0.0251(16) 0.0010(14) 0.0110(14) -0.0001(14)
C33 0.0289(19) 0.0330(19) 0.0308(17) 0.0097(15) 0.0120(15) 0.0081(14)
C34 0.040(2) 0.034(2) 0.0312(18) 0.0121(15) 0.0098(16) -0.0046(16)
C35 0.0232(19) 0.060(3) 0.039(2) 0.0229(18) 0.0074(16) -0.0093(17)
C36 0.0175(17) 0.045(2) 0.0331(17) 0.0144(16) 0.0040(14) -0.0018(15)
C37 0.0142(16) 0.0322(18) 0.0264(15) -0.0116(14) 0.0058(13) -0.0004(13)
C38 0.0210(18) 0.0310(19) 0.0375(18) -0.0098(15) 0.0039(15) 0.0009(14)
C39 0.028(2) 0.040(2) 0.062(2) -0.027(2) 0.0098(18) -0.0009(16)
C40 0.026(2) 0.062(3) 0.078(3) -0.048(3) 0.020(2) -0.0061(19)
C41 0.030(2) 0.090(3) 0.040(2) -0.035(2) 0.0206(18) -0.022(2)
C42 0.0218(18) 0.055(2) 0.0298(17) -0.0155(16) 0.0108(14) -0.0102(16)
C43 0.0209(16) 0.0219(16) 0.0137(13) 0.0016(12) 0.0035(12) 0.0027(12)
C44 0.0230(17) 0.0296(18) 0.0257(16) -0.0076(14) 0.0078(13) -0.0033(13)
C45 0.0276(19) 0.039(2) 0.0261(16) -0.0061(15) 0.0084(14) 0.0078(15)
C46 0.034(2) 0.0261(17) 0.0252(16) -0.0072(14) 0.0068(15) 0.0035(14)
C47 0.0325(19) 0.0261(17) 0.0269(16) -0.0027(14) 0.0094(15) -0.0085(14)
C48 0.0265(18) 0.0240(17) 0.0239(15) -0.0037(13) 0.0104(13) -0.0017(13)
C49 0.0188(16) 0.0246(17) 0.0242(15) 0.0053(13) 0.0056(13) 0.0001(12)
C50 0.0246(18) 0.0353(19) 0.0271(16) 0.0069(15) 0.0086(14) 0.0035(14)
C51 0.028(2) 0.055(2) 0.0368(19) 0.0207(18) 0.0157(16) 0.0094(17)
C52 0.0218(19) 0.046(2) 0.047(2) 0.0305(19) 0.0067(16) -0.0011(16)
C53 0.031(2) 0.0245(18) 0.052(2) 0.0099(17) 0.0016(17) -0.0027(15)
C54 0.0292(19) 0.0253(18) 0.0324(17) 0.0065(15) 0.0066(15) 0.0002(14)
C55 0.0181(16) 0.0259(17) 0.0209(14) -0.0043(13) 0.0047(12) -0.0015(12)
C56 0.0224(18) 0.0293(19) 0.046(2) 0.0078(16) 0.0088(16) 0.0022(14)
C57 0.025(2) 0.034(2) 0.064(2) 0.0093(19) 0.0085(18) 0.0058(16)
C58 0.0204(18) 0.040(2) 0.047(2) -0.0113(17) 0.0104(16) -0.0004(15)
C59 0.0246(18) 0.042(2) 0.0225(15) -0.0064(15) 0.0101(14) -0.0058(15)
C60 0.0205(17) 0.0299(18) 0.0208(15) -0.0047(13) 0.0064(13) 0.0002(13)
O1 0.0201(13) 0.0141(12) 0.0273(12) 0.0001(10) 0.0092(10) -0.0005(10)
O1A 0.0201(13) 0.0141(12) 0.0273(12) 0.0001(10) 0.0092(10) -0.0005(10)
O2 0.0207(13) 0.0150(13) 0.0200(12) -0.0003(10) 0.0103(10) 0.0035(10)
O2A 0.0207(13) 0.0150(13) 0.0200(12) -0.0003(10) 0.0103(10) 0.0035(10)
O3 0.0226(14) 0.0355(16) 0.0247(13) 0.0053(12) 0.0086(11) 0.0013(12)
O3A 0.0226(14) 0.0355(16) 0.0247(13) 0.0053(12) 0.0086(11) 0.0013(12)
O4 0.0280(15) 0.0291(15) 0.0379(14) -0.0010(12) 0.0147(12) -0.0009(11)
O4A 0.0280(15) 0.0291(15) 0.0379(14) -0.0010(12) 0.0147(12) -0.0009(11)
P1 0.0162(4) 0.0200(4) 0.0174(4) -0.0019(3) 0.0051(3) -0.0008(3)
P2 0.0173(4) 0.0176(4) 0.0168(3) 0.0003(3) 0.0048(3) 0.0000(3)
Ru1 0.01707(12) 0.01481(12) 0.01666(11) -0.00046(10) 0.00478(9) -0.00030(9)
C120 0.0181(16) 0.0255(16) 0.0188(14) -0.0016(13) 0.0076(12) -0.0018(12)
C61 0.0175(19) 0.0210(18) 0.0135(15) -0.0017(14) 0.0024(13) 0.0008(14)
C61A 0.0175(19) 0.0210(18) 0.0135(15) -0.0017(14) 0.0024(13) 0.0008(14)
C62 0.0188(17) 0.024(2) 0.0177(18) -0.0012(15) 0.0060(14) 0.0011(15)
C62A 0.0188(17) 0.024(2) 0.0177(18) -0.0012(15) 0.0060(14) 0.0011(15)
C67A 0.042(2) 0.026(2) 0.0319(18) 0.005(2) 0.0236(17) 0.007(2)
C66A 0.043(3) 0.031(2) 0.041(3) 0.005(2) 0.025(2) 0.014(2)
C65A 0.028(2) 0.036(2) 0.0313(19) -0.0017(16) 0.0172(18) 0.0050(15)
C64A 0.033(2) 0.033(2) 0.030(2) 0.0038(18) 0.0197(18) 0.0017(18)
C63A 0.0305(19) 0.0212(17) 0.0243(19) -0.0007(16) 0.0105(17) 0.0017(14)
C63 0.0305(19) 0.0212(17) 0.0243(19) -0.0007(16) 0.0105(17) 0.0017(14)
C64 0.033(2) 0.033(2) 0.030(2) 0.0038(18) 0.0197(18) 0.0017(18)
C65 0.028(2) 0.036(2) 0.0313(19) -0.0017(16) 0.0172(18) 0.0050(15)
C66 0.043(3) 0.031(2) 0.041(3) 0.005(2) 0.025(2) 0.014(2)
C67 0.042(2) 0.026(2) 0.0319(18) 0.005(2) 0.0236(17) 0.007(2)
C68 0.049(3) 0.048(4) 0.053(3) 0.002(3) 0.036(3) 0.016(3)
C68A 0.049(3) 0.048(4) 0.053(3) 0.002(3) 0.036(3) 0.016(3)
C69 0.0170(17) 0.0242(18) 0.0197(15) -0.0013(14) 0.0043(13) 0.0035(13)
C69A 0.0170(17) 0.0242(18) 0.0197(15) -0.0013(14) 0.0043(13) 0.0035(13)
C70 0.0168(16) 0.0219(19) 0.0235(18) 0.0041(15) 0.0052(14) 0.0006(14)
C70A 0.0168(16) 0.0219(19) 0.0235(18) 0.0041(15) 0.0052(14) 0.0006(14)
C71A 0.024(2) 0.030(2) 0.0263(16) -0.0014(16) 0.0123(15) -0.0056(17)
C72A 0.030(2) 0.0280(18) 0.034(2) -0.0061(15) 0.0135(17) -0.0081(16)
C73A 0.0219(18) 0.029(2) 0.031(2) 0.006(2) 0.0105(15) -0.0024(16)
C74A 0.032(2) 0.032(2) 0.0348(19) -0.0040(19) 0.0205(17) -0.0046(17)
C75A 0.033(2) 0.0265(19) 0.0293(19) -0.0010(15) 0.0152(16) 0.0005(15)
C71 0.024(2) 0.030(2) 0.0263(16) -0.0014(16) 0.0123(15) -0.0056(17)
C72 0.030(2) 0.0280(18) 0.034(2) -0.0061(15) 0.0135(17) -0.0081(16)
C73 0.0219(18) 0.029(2) 0.031(2) 0.006(2) 0.0105(15) -0.0024(16)
C74 0.032(2) 0.032(2) 0.0348(19) -0.0040(19) 0.0205(17) -0.0046(17)
C75 0.033(2) 0.0265(19) 0.0293(19) -0.0010(15) 0.0152(16) 0.0005(15)
C76 0.038(2) 0.041(3) 0.051(3) 0.009(2) 0.021(2) -0.007(2)
C76A 0.038(2) 0.041(3) 0.051(3) 0.009(2) 0.021(2) -0.007(2)
C77 0.0179(16) 0.0237(17) 0.0154(14) 0.0012(13) 0.0062(12) -0.0008(13)
C77A 0.0179(16) 0.0237(17) 0.0154(14) 0.0012(13) 0.0062(12) -0.0008(13)
C78 0.0213(17) 0.0202(17) 0.0252(16) -0.0027(14) 0.0077(14) 0.0027(13)
C78A 0.0213(17) 0.0202(17) 0.0252(16) -0.0027(14) 0.0077(14) 0.0027(13)
C79 0.023(2) 0.0176(16) 0.0207(17) -0.0009(14) -0.0013(15) 0.0005(13)
C80 0.038(2) 0.028(2) 0.030(2) -0.0034(16) 0.0086(17) -0.0030(16)
C80A 0.038(2) 0.028(2) 0.030(2) -0.0034(16) 0.0086(17) -0.0030(16)
C81A 0.041(3) 0.046(2) 0.035(2) 0.0024(19) 0.0116(18) -0.0133(19)
C82A 0.045(3) 0.027(2) 0.047(3) 0.0073(19) -0.006(2) -0.0112(18)
C83A 0.027(2) 0.0229(19) 0.047(2) -0.0058(18) -0.0054(19) 0.0003(15)
C84A 0.027(2) 0.0218(18) 0.043(2) -0.0039(17) 0.0033(17) 0.0042(15)
C79A 0.023(2) 0.0176(16) 0.0207(17) -0.0009(14) -0.0013(15) 0.0005(13)
C81 0.041(3) 0.046(2) 0.035(2) 0.0024(19) 0.0116(18) -0.0133(19)
C82 0.045(3) 0.027(2) 0.047(3) 0.0073(19) -0.006(2) -0.0112(18)
C83 0.027(2) 0.0229(19) 0.047(2) -0.0058(18) -0.0054(19) 0.0003(15)
C84 0.027(2) 0.0218(18) 0.043(2) -0.0039(17) 0.0033(17) 0.0042(15)
C85 0.0158(15) 0.0233(16) 0.0172(13) -0.0044(12) 0.0065(12) -0.0027(12)
C86 0.0185(16) 0.0245(16) 0.0200(14) -0.0003(13) 0.0072(12) -0.0019(12)
C87 0.0232(17) 0.0193(16) 0.0295(16) -0.0022(13) 0.0098(14) 0.0008(12)
C88 0.0209(17) 0.0324(19) 0.0314(17) -0.0138(15) 0.0129(14) -0.0044(14)
C89 0.0272(18) 0.0372(19) 0.0184(14) -0.0050(14) 0.0110(13) -0.0050(14)
C90 0.0191(16) 0.0252(17) 0.0244(15) -0.0004(13) 0.0088(13) -0.0026(12)
C91 0.0134(14) 0.0192(15) 0.0174(13) 0.0037(12) 0.0028(11) 0.0025(11)
C92 0.0193(16) 0.0234(16) 0.0204(14) 0.0014(13) 0.0068(12) 0.0009(12)
C93 0.0204(17) 0.0244(17) 0.0294(16) 0.0024(14) 0.0063(13) -0.0013(13)
C94 0.0154(16) 0.0313(18) 0.0274(16) 0.0086(14) 0.0076(13) 0.0035(13)
C95 0.0199(17) 0.0330(18) 0.0217(15) 0.0021(13) 0.0083(13) 0.0038(13)
C96 0.0182(16) 0.0237(16) 0.0175(14) -0.0003(12) 0.0034(12) 0.0006(12)
C97 0.0239(16) 0.0206(15) 0.0116(13) -0.0009(12) 0.0038(12) -0.0012(12)
C98 0.0347(19) 0.0254(17) 0.0237(15) 0.0057(13) 0.0132(14) 0.0078(14)
C99 0.054(2) 0.0269(18) 0.0273(17) 0.0068(15) 0.0175(17) 0.0154(16)
C100 0.064(3) 0.0184(17) 0.0256(17) 0.0044(14) 0.0144(17) -0.0039(17)
C101 0.037(2) 0.033(2) 0.0319(18) 0.0067(15) 0.0081(16) -0.0108(16)
C102 0.0244(18) 0.0291(18) 0.0302(17) 0.0070(14) 0.0059(14) -0.0012(14)
C103 0.0151(15) 0.0176(15) 0.0158(13) -0.0059(11) 0.0062(11) -0.0031(11)
C104 0.0194(16) 0.0242(16) 0.0192(14) -0.0004(12) 0.0067(12) 0.0014(12)
C105 0.0259(18) 0.0309(18) 0.0217(15) -0.0044(13) 0.0135(14) -0.0080(14)
C106 0.0161(16) 0.0309(18) 0.0272(16) -0.0078(14) 0.0099(13) -0.0010(13)
C107 0.0166(16) 0.0253(17) 0.0279(16) -0.0021(13) 0.0044(13) 0.0044(12)
C108 0.0214(16) 0.0217(16) 0.0210(14) -0.0009(12) 0.0081(13) 0.0001(12)
C109 0.0223(16) 0.0190(15) 0.0133(13) 0.0000(12) 0.0047(12) 0.0053(12)
C110 0.0229(17) 0.0314(18) 0.0253(15) -0.0032(14) 0.0069(13) 0.0082(13)
C111 0.038(2) 0.0336(19) 0.0269(16) -0.0024(15) 0.0115(15) 0.0159(16)
C112 0.046(2) 0.0223(17) 0.0214(15) -0.0045(13) 0.0067(15) 0.0037(15)
C113 0.036(2) 0.0231(17) 0.0244(16) -0.0015(13) 0.0107(14) -0.0042(14)
C114 0.0254(17) 0.0234(16) 0.0179(14) 0.0001(12) 0.0091(13) 0.0015(13)
C115 0.0121(14) 0.0226(16) 0.0169(13) -0.0015(12) 0.0058(11) 0.0012(11)
C116 0.0203(16) 0.0260(16) 0.0153(13) 0.0017(12) 0.0069(12) 0.0012(12)
C117 0.0267(18) 0.0227(16) 0.0226(15) 0.0008(13) 0.0102(13) -0.0008(13)
C118 0.0237(17) 0.0298(18) 0.0224(15) 0.0086(13) 0.0104(13) 0.0013(13)
C119 0.0212(17) 0.0353(18) 0.0155(13) 0.0021(13) 0.0073(12) 0.0008(13)
O5 0.0194(12) 0.0181(12) 0.0170(10) -0.0006(9) 0.0082(9) 0.0007(9)
O5A 0.0194(12) 0.0181(12) 0.0170(10) -0.0006(9) 0.0082(9) 0.0007(9)
O6 0.0199(12) 0.0179(11) 0.0179(10) 0.0000(9) 0.0083(9) -0.0004(9)
O6A 0.0199(12) 0.0179(11) 0.0179(10) 0.0000(9) 0.0083(9) -0.0004(9)
O7 0.0182(13) 0.0215(13) 0.0218(11) 0.0026(10) 0.0088(10) 0.0015(9)
O7A 0.0182(13) 0.0215(13) 0.0218(11) 0.0026(10) 0.0088(10) 0.0015(9)
O8 0.0282(14) 0.0275(13) 0.0317(12) -0.0039(10) 0.0167(11) -0.0038(10)
O8A 0.0282(14) 0.0275(13) 0.0317(12) -0.0039(10) 0.0167(11) -0.0038(10)
P3 0.0145(4) 0.0168(4) 0.0144(3) -0.0002(3) 0.0033(3) -0.0005(3)
P4 0.0138(4) 0.0171(4) 0.0134(3) -0.0003(3) 0.0048(3) 0.0014(3)
Ru2 0.01335(11) 0.01375(11) 0.01371(10) -0.00020(9) 0.00504(8) 0.00126(9)

_geom_special_details            
;
 All esds (except the esd in the dihedral angle between two l.s. planes) 
 are estimated using the full covariance matrix.  The cell esds are taken 
 into account individually in the estimation of esds in distances, angles 
 and torsion angles; correlations between esds in cell parameters are only 
 used when they are defined by crystal symmetry.  An approximate (isotropic) 
 treatment of cell esds is used for estimating esds involving l.s. planes. 
;
loop_
_geom_bond_atom_site_label_1
_geom_bond_atom_site_label_2
_geom_bond_distance
_geom_bond_site_symmetry_2
_geom_bond_publ_flag
C1 C2 1.485(6) . ?
C1 O1 1.276(4) . ?
C1 O2 1.288(4) . ?
C1 Ru1 2.570(4) . ?
C1A C2A 1.69(5) . ?
C1A O1A 1.26(3) . ?
C1A O2A 1.13(3) . ?
C2 C3 1.386(5) . ?
C2 C7 1.378(5) . ?
C2A C3A 1.3900 . ?
C2A C7A 1.3900 . ?
C3A H3A 0.9300 . ?
C3A C4A 1.3900 . ?
C4A H4A 0.9300 . ?
C4A C5A 1.3900 . ?
C5A C6A 1.3900 . ?
C6A H6A 0.9300 . ?
C6A C7A 1.3900 . ?
C7A H7A 0.9300 . ?
C3 H3 0.9300 . ?
C3 C4 1.392(5) . ?
C4 H4 0.9300 . ?
C4 C5 1.390(5) . ?
C5 C6 1.392(5) . ?
C5 C8 1.499(6) . ?
C6 H6 0.9300 . ?
C6 C7 1.385(5) . ?
C7 H7 0.9300 . ?
C8 H8A 0.9599 . ?
C8 H8B 0.9600 . ?
C8 H8C 0.9600 . ?
C8 H8AA 0.9599 . ?
C8 H8AB 0.9599 . ?
C8 H8AC 0.9600 . ?
C9 C10 1.521(5) . ?
C9 O3 1.276(4) . ?
C9 O4 1.221(4) . ?
C9A C10A 1.55(4) . ?
C9A O3A 1.26(3) . ?
C9A O4A 1.41(3) . ?
C10 C11 1.389(5) . ?
C10 C15 1.381(5) . ?
C10A C11A 1.3900 . ?
C10A C15A 1.3900 . ?
C11A H11A 0.9300 . ?
C11A C12A 1.3900 . ?
C12A H12A 0.9300 . ?
C12A C13A 1.3900 . ?
C13A C14A 1.3900 . ?
C13A C16A 1.524(19) . ?
C14A H14A 0.9300 . ?
C14A C15A 1.3900 . ?
C15A H15A 0.9300 . ?
C11 H11 0.9300 . ?
C11 C12 1.389(5) . ?
C12 H12 0.9300 . ?
C12 C13 1.391(5) . ?
C13 C14 1.382(5) . ?
C13 C16 1.501(5) . ?
C14 H14 0.9300 . ?
C14 C15 1.368(5) . ?
C15 H15 0.9300 . ?
C16 H16A 0.9600 . ?
C16 H16B 0.9600 . ?
C16 H16C 0.9600 . ?
C16A H16D 0.9600 . ?
C16A H16E 0.9600 . ?
C16A H16F 0.9600 . ?
C17 C18 1.302(5) . ?
C17 Ru1 1.797(4) . ?
C17A C18A 1.69(4) . ?
C17A Ru1 1.70(4) . ?
C18 H18 0.9300 . ?
C18 C19 1.482(5) . ?
C18A H18A 0.9300 . ?
C18A C24A 1.43(3) . ?
C19 C20 1.397(5) . ?
C19 C24 1.394(5) . ?
C20 H20 0.9300 . ?
C20 C21 1.379(5) . ?
C21 H21 0.9300 . ?
C21 C22 1.360(5) . ?
C22 H22 0.9300 . ?
C22 C23 1.393(5) . ?
C23 H23 0.9300 . ?
C23 C24 1.368(5) . ?
C24 H24 0.9300 . ?
C24A C19A 1.3900 . ?
C24A C23A 1.3900 . ?
C19A H19A 0.9300 . ?
C19A C20A 1.3900 . ?
C20A H20A 0.9300 . ?
C20A C21A 1.3900 . ?
C21A H21A 0.9300 . ?
C21A C22A 1.3900 . ?
C22A H22A 0.9300 . ?
C22A C23A 1.3900 . ?
C23A H23A 0.9300 . ?
C25 C26 1.388(4) . ?
C25 C30 1.388(4) . ?
C25 P1 1.830(3) . ?
C26 H26 0.9300 . ?
C26 C27 1.386(4) . ?
C27 H27 0.9300 . ?
C27 C28 1.379(4) . ?
C28 H28 0.9300 . ?
C28 C29 1.379(4) . ?
C29 H29 0.9300 . ?
C29 C30 1.386(4) . ?
C30 H30 0.9300 . ?
C31 C32 1.399(4) . ?
C31 C36 1.395(4) . ?
C31 P1 1.824(3) . ?
C32 H32 0.9300 . ?
C32 C33 1.384(4) . ?
C33 H33 0.9300 . ?
C33 C34 1.368(4) . ?
C34 H34 0.9300 . ?
C34 C35 1.383(4) . ?
C35 H35 0.9300 . ?
C35 C36 1.374(4) . ?
C36 H36 0.9300 . ?
C37 C38 1.403(4) . ?
C37 C42 1.392(4) . ?
C37 P1 1.819(3) . ?
C38 H38 0.9300 . ?
C38 C39 1.375(4) . ?
C39 H39 0.9300 . ?
C39 C40 1.369(5) . ?
C40 H40 0.9300 . ?
C40 C41 1.376(5) . ?
C41 H41 0.9300 . ?
C41 C42 1.399(5) . ?
C42 H42 0.9300 . ?
C43 C44 1.395(4) . ?
C43 C48 1.400(4) . ?
C43 P2 1.827(3) . ?
C44 H44 0.9300 . ?
C44 C45 1.387(4) . ?
C45 H45 0.9300 . ?
C45 C46 1.375(4) . ?
C46 H46 0.9300 . ?
C46 C47 1.381(4) . ?
C47 H47 0.9300 . ?
C47 C48 1.381(4) . ?
C48 H48 0.9300 . ?
C49 C50 1.386(4) . ?
C49 C54 1.395(4) . ?
C49 P2 1.825(3) . ?
C50 H50 0.9300 . ?
C50 C51 1.383(4) . ?
C51 H51 0.9300 . ?
C51 C52 1.358(5) . ?
C52 H52 0.9300 . ?
C52 C53 1.395(5) . ?
C53 H53 0.9300 . ?
C53 C54 1.393(4) . ?
C54 H54 0.9300 . ?
C55 C56 1.383(4) . ?
C55 C60 1.393(4) . ?
C55 P2 1.829(3) . ?
C56 H56 0.9300 . ?
C56 C57 1.388(4) . ?
C57 H57 0.9300 . ?
C57 C58 1.374(4) . ?
C58 H58 0.9300 . ?
C58 C59 1.385(4) . ?
C59 H59 0.9300 . ?
C59 C60 1.381(4) . ?
C60 H60 0.9300 . ?
O1 Ru1 2.251(2) . ?
O1A Ru1 1.933(19) . ?
O2 Ru1 2.148(2) . ?
O3 Ru1 2.013(3) . ?
O4A Ru1 2.19(2) . ?
P1 Ru1 2.3733(7) . ?
P2 Ru1 2.3883(7) . ?
C120 H120 0.9300 . ?
C120 C115 1.392(3) . ?
C120 C119 1.382(4) . ?
C61 C62 1.479(4) . ?
C61 O5 1.285(4) . ?
C61 O6 1.265(4) . ?
C61 Ru2 2.549(3) . ?
C61A C62A 1.54(6) . ?
C61A O5A 1.23(5) . ?
C61A O6A 1.23(5) . ?
C62 C63 1.387(4) . ?
C62 C67 1.391(4) . ?
C62A C67A 1.3900 . ?
C62A C63A 1.3900 . ?
C67A H67A 0.9300 . ?
C67A C66A 1.3900 . ?
C66A H66A 0.9300 . ?
C66A C65A 1.3900 . ?
C65A C64A 1.3900 . ?
C65A C68A 1.53(2) . ?
C64A H64A 0.9300 . ?
C64A C63A 1.3900 . ?
C63A H63A 0.9300 . ?
C63 H63 0.9300 . ?
C63 C64 1.387(4) . ?
C64 H64 0.9300 . ?
C64 C65 1.387(5) . ?
C65 C66 1.387(4) . ?
C65 C68 1.509(4) . ?
C66 H66 0.9300 . ?
C66 C67 1.385(4) . ?
C67 H67 0.9300 . ?
C68 H68A 0.9600 . ?
C68 H68B 0.9600 . ?
C68 H68C 0.9600 . ?
C68A H68D 0.9600 . ?
C68A H68E 0.9600 . ?
C68A H68F 0.9600 . ?
C69 C70 1.495(4) . ?
C69 O7 1.293(4) . ?
C69 O8 1.235(4) . ?
C69A C70A 1.523(19) . ?
C69A O7A 1.16(5) . ?
C69A O8A 1.38(5) . ?
C70 C71 1.390(5) . ?
C70 C75 1.389(4) . ?
C70A C71A 1.3900 . ?
C70A C75A 1.3900 . ?
C71A H71A 0.9300 . ?
C71A C72A 1.3900 . ?
C72A H72A 0.9300 . ?
C72A C73A 1.3900 . ?
C73A C74A 1.3900 . ?
C73A C76A 1.56(6) . ?
C74A H74A 0.9300 . ?
C74A C75A 1.3900 . ?
C75A H75A 0.9300 . ?
C71 H71 0.9300 . ?
C71 C72 1.393(5) . ?
C72 H72 0.9300 . ?
C72 C73 1.391(5) . ?
C73 C74 1.384(5) . ?
C73 C76 1.504(5) . ?
C74 H74 0.9300 . ?
C74 C75 1.378(5) . ?
C75 H75 0.9300 . ?
C76 H76A 0.9600 . ?
C76 H76B 0.9600 . ?
C76 H76C 0.9600 . ?
C76A H76D 0.9600 . ?
C76A H76E 0.9600 . ?
C76A H76F 0.9600 . ?
C77 C78 1.310(4) . ?
C77 Ru2 1.796(3) . ?
C77A C78A 1.44(5) . ?
C77A Ru2 1.72(4) . ?
C78 H78 0.9300 . ?
C78 C79 1.472(4) . ?
C78A H78A 0.9300 . ?
C78A C80A 1.43(5) . ?
C79 C80 1.395(4) . ?
C79 C84 1.397(4) . ?
C80 H80 0.9300 . ?
C80 C81 1.386(5) . ?
C80A C81A 1.3900 . ?
C80A C79A 1.3900 . ?
C81A H81A 0.9300 . ?
C81A C82A 1.3900 . ?
C82A H82A 0.9300 . ?
C82A C83A 1.3900 . ?
C83A H83A 0.9300 . ?
C83A C84A 1.3900 . ?
C84A H84A 0.9300 . ?
C84A C79A 1.3900 . ?
C79A H79A 0.9300 . ?
C81 H81 0.9300 . ?
C81 C82 1.378(5) . ?
C82 H82 0.9300 . ?
C82 C83 1.372(5) . ?
C83 H83 0.9300 . ?
C83 C84 1.384(5) . ?
C84 H84 0.9300 . ?
C85 C86 1.390(4) . ?
C85 C90 1.395(4) . ?
C85 P3 1.826(3) . ?
C86 H86 0.9300 . ?
C86 C87 1.382(4) . ?
C87 H87 0.9300 . ?
C87 C88 1.381(4) . ?
C88 H88 0.9300 . ?
C88 C89 1.377(4) . ?
C89 H89 0.9300 . ?
C89 C90 1.385(4) . ?
C90 H90 0.9300 . ?
C91 C92 1.384(4) . ?
C91 C96 1.396(4) . ?
C91 P3 1.826(3) . ?
C92 H92 0.9300 . ?
C92 C93 1.389(4) . ?
C93 H93 0.9300 . ?
C93 C94 1.380(4) . ?
C94 H94 0.9300 . ?
C94 C95 1.382(4) . ?
C95 H95 0.9300 . ?
C95 C96 1.381(4) . ?
C96 H96 0.9300 . ?
C97 C98 1.379(4) . ?
C97 C102 1.394(4) . ?
C97 P3 1.830(3) . ?
C98 H98 0.9300 . ?
C98 C99 1.390(4) . ?
C99 H99 0.9300 . ?
C99 C100 1.380(4) . ?
C100 H100 0.9300 . ?
C100 C101 1.372(5) . ?
C101 H101 0.9300 . ?
C101 C102 1.384(4) . ?
C102 H102 0.9300 . ?
C103 C104 1.392(4) . ?
C103 C108 1.390(4) . ?
C103 P4 1.838(3) . ?
C104 H104 0.9300 . ?
C104 C105 1.388(4) . ?
C105 H105 0.9300 . ?
C105 C106 1.381(4) . ?
C106 H106 0.9300 . ?
C106 C107 1.378(4) . ?
C107 H107 0.9300 . ?
C107 C108 1.393(4) . ?
C108 H108 0.9300 . ?
C109 C110 1.393(4) . ?
C109 C114 1.389(4) . ?
C109 P4 1.837(3) . ?
C110 H110 0.9300 . ?
C110 C111 1.384(4) . ?
C111 H111 0.9300 . ?
C111 C112 1.380(4) . ?
C112 H112 0.9300 . ?
C112 C113 1.379(4) . ?
C113 H113 0.9300 . ?
C113 C114 1.387(4) . ?
C114 H114 0.9300 . ?
C115 C116 1.394(4) . ?
C115 P4 1.818(3) . ?
C116 H116 0.9300 . ?
C116 C117 1.391(4) . ?
C117 H117 0.9300 . ?
C117 C118 1.381(4) . ?
C118 H118 0.9300 . ?
C118 C119 1.384(4) . ?
C119 H119 0.9300 . ?
O5 Ru2 2.1316(19) . ?
O6 Ru2 2.2414(19) . ?
O6A Ru2 1.98(3) . ?
O7 Ru2 2.025(2) . ?
O7A Ru2 2.36(3) . ?
O8A Ru2 2.07(3) . ?
P3 Ru2 2.3778(7) . ?
P4 Ru2 2.4061(7) . ?

loop_
_geom_angle_atom_site_label_1
_geom_angle_atom_site_label_2
_geom_angle_atom_site_label_3
_geom_angle
_geom_angle_site_symmetry_1
_geom_angle_site_symmetry_3
_geom_angle_publ_flag
C2 C1 Ru1 176.9(3) . . ?
O1 C1 C2 120.2(3) . . ?
O1 C1 O2 117.6(3) . . ?
O1 C1 Ru1 61.14(19) . . ?
O2 C1 C2 122.1(4) . . ?
O2 C1 Ru1 56.54(18) . . ?
O1A C1A C2A 101(3) . . ?
O2A C1A C2A 113(3) . . ?
O2A C1A O1A 146(3) . . ?
C3 C2 C1 120.1(4) . . ?
C7 C2 C1 120.5(4) . . ?
C7 C2 C3 119.3(3) . . ?
C3A C2A C1A 126(3) . . ?
C3A C2A C7A 120.0 . . ?
C7A C2A C1A 114(3) . . ?
C2A C3A H3A 120.0 . . ?
C4A C3A C2A 120.0 . . ?
C4A C3A H3A 120.0 . . ?
C3A C4A H4A 120.0 . . ?
C3A C4A C5A 120.0 . . ?
C5A C4A H4A 120.0 . . ?
C6A C5A C4A 120.0 . . ?
C5A C6A H6A 120.0 . . ?
C7A C6A C5A 120.0 . . ?
C7A C6A H6A 120.0 . . ?
C2A C7A H7A 120.0 . . ?
C6A C7A C2A 120.0 . . ?
C6A C7A H7A 120.0 . . ?
C2 C3 H3 120.2 . . ?
C2 C3 C4 119.7(3) . . ?
C4 C3 H3 120.2 . . ?
C3 C4 H4 119.3 . . ?
C5 C4 C3 121.4(3) . . ?
C5 C4 H4 119.3 . . ?
C4 C5 C6 117.9(3) . . ?
C4 C5 C8 118.2(4) . . ?
C6 C5 C8 123.9(4) . . ?
C5 C6 H6 119.6 . . ?
C7 C6 C5 120.7(3) . . ?
C7 C6 H6 119.6 . . ?
C2 C7 C6 120.9(3) . . ?
C2 C7 H7 119.6 . . ?
C6 C7 H7 119.6 . . ?
C5 C8 H8A 109.5 . . ?
C5 C8 H8B 109.5 . . ?
C5 C8 H8C 109.5 . . ?
C5 C8 H8AA 105.8 . . ?
C5 C8 H8AB 100.0 . . ?
C5 C8 H8AC 122.0 . . ?
H8A C8 H8B 109.5 . . ?
H8A C8 H8C 109.5 . . ?
H8A C8 H8AA 8.5 . . ?
H8A C8 H8AB 101.1 . . ?
H8A C8 H8AC 112.1 . . ?
H8B C8 H8C 109.5 . . ?
H8B C8 H8AA 117.9 . . ?
H8B C8 H8AB 16.8 . . ?
H8B C8 H8AC 92.7 . . ?
H8C C8 H8AA 104.5 . . ?
H8C C8 H8AB 126.2 . . ?
H8C C8 H8AC 17.6 . . ?
H8AA C8 H8AB 109.5 . . ?
H8AA C8 H8AC 109.5 . . ?
H8AB C8 H8AC 109.5 . . ?
O3 C9 C10 113.0(3) . . ?
O4 C9 C10 119.4(3) . . ?
O4 C9 O3 127.6(4) . . ?
O3A C9A C10A 124(3) . . ?
O3A C9A O4A 114(3) . . ?
O4A C9A C10A 122(3) . . ?
C11 C10 C9 123.6(3) . . ?
C15 C10 C9 118.2(3) . . ?
C15 C10 C11 118.1(3) . . ?
C11A C10A C9A 115(2) . . ?
C11A C10A C15A 120.0 . . ?
C15A C10A C9A 125(2) . . ?
C10A C11A H11A 120.0 . . ?
C10A C11A C12A 120.0 . . ?
C12A C11A H11A 120.0 . . ?
C11A C12A H12A 120.0 . . ?
C13A C12A C11A 120.0 . . ?
C13A C12A H12A 120.0 . . ?
C12A C13A C16A 119.1(9) . . ?
C14A C13A C12A 120.0 . . ?
C14A C13A C16A 120.0(9) . . ?
C13A C14A H14A 120.0 . . ?
C13A C14A C15A 120.0 . . ?
C15A C14A H14A 120.0 . . ?
C10A C15A H15A 120.0 . . ?
C14A C15A C10A 120.0 . . ?
C14A C15A H15A 120.0 . . ?
C10 C11 H11 119.8 . . ?
C10 C11 C12 120.4(3) . . ?
C12 C11 H11 119.8 . . ?
C11 C12 H12 119.6 . . ?
C11 C12 C13 120.8(3) . . ?
C13 C12 H12 119.6 . . ?
C12 C13 C16 121.3(3) . . ?
C14 C13 C12 118.1(3) . . ?
C14 C13 C16 120.6(3) . . ?
C13 C14 H14 119.6 . . ?
C15 C14 C13 120.9(3) . . ?
C15 C14 H14 119.6 . . ?
C10 C15 H15 119.2 . . ?
C14 C15 C10 121.7(3) . . ?
C14 C15 H15 119.2 . . ?
C13A C16A H16D 109.5 . . ?
C13A C16A H16E 109.5 . . ?
C13A C16A H16F 109.5 . . ?
H16D C16A H16E 109.5 . . ?
H16D C16A H16F 109.5 . . ?
H16E C16A H16F 109.5 . . ?
C18 C17 Ru1 179.3(3) . . ?
C18A C17A Ru1 127.0(19) . . ?
C17 C18 H18 116.3 . . ?
C17 C18 C19 127.4(3) . . ?
C19 C18 H18 116.3 . . ?
C17A C18A H18A 124.8 . . ?
C24A C18A C17A 110(2) . . ?
C24A C18A H18A 124.8 . . ?
C20 C19 C18 118.6(3) . . ?
C24 C19 C18 123.7(3) . . ?
C24 C19 C20 117.7(3) . . ?
C19 C20 H20 119.8 . . ?
C21 C20 C19 120.3(3) . . ?
C21 C20 H20 119.8 . . ?
C20 C21 H21 119.3 . . ?
C22 C21 C20 121.4(4) . . ?
C22 C21 H21 119.3 . . ?
C21 C22 H22 120.4 . . ?
C21 C22 C23 119.1(4) . . ?
C23 C22 H22 120.4 . . ?
C22 C23 H23 119.9 . . ?
C24 C23 C22 120.1(4) . . ?
C24 C23 H23 119.9 . . ?
C19 C24 H24 119.3 . . ?
C23 C24 C19 121.4(4) . . ?
C23 C24 H24 119.3 . . ?
C19A C24A C18A 111.9(19) . . ?
C19A C24A C23A 120.0 . . ?
C23A C24A C18A 128.1(19) . . ?
C24A C19A H19A 120.0 . . ?
C20A C19A C24A 120.0 . . ?
C20A C19A H19A 120.0 . . ?
C19A C20A H20A 120.0 . . ?
C21A C20A C19A 120.0 . . ?
C21A C20A H20A 120.0 . . ?
C20A C21A H21A 120.0 . . ?
C20A C21A C22A 120.0 . . ?
C22A C21A H21A 120.0 . . ?
C21A C22A H22A 120.0 . . ?
C23A C22A C21A 120.0 . . ?
C23A C22A H22A 120.0 . . ?
C24A C23A H23A 120.0 . . ?
C22A C23A C24A 120.0 . . ?
C22A C23A H23A 120.0 . . ?
C26 C25 C30 118.5(3) . . ?
C26 C25 P1 121.7(2) . . ?
C30 C25 P1 119.6(2) . . ?
C25 C26 H26 119.7 . . ?
C27 C26 C25 120.5(3) . . ?
C27 C26 H26 119.7 . . ?
C26 C27 H27 119.8 . . ?
C28 C27 C26 120.4(3) . . ?
C28 C27 H27 119.8 . . ?
C27 C28 H28 120.2 . . ?
C29 C28 C27 119.6(3) . . ?
C29 C28 H28 120.2 . . ?
C28 C29 H29 120.0 . . ?
C28 C29 C30 120.1(3) . . ?
C30 C29 H29 120.0 . . ?
C25 C30 H30 119.6 . . ?
C29 C30 C25 120.9(3) . . ?
C29 C30 H30 119.6 . . ?
C32 C31 P1 123.2(2) . . ?
C36 C31 C32 118.3(3) . . ?
C36 C31 P1 118.4(2) . . ?
C31 C32 H32 120.0 . . ?
C33 C32 C31 120.0(3) . . ?
C33 C32 H32 120.0 . . ?
C32 C33 H33 119.6 . . ?
C34 C33 C32 120.8(3) . . ?
C34 C33 H33 119.6 . . ?
C33 C34 H34 120.1 . . ?
C33 C34 C35 119.9(3) . . ?
C35 C34 H34 120.1 . . ?
C34 C35 H35 120.0 . . ?
C36 C35 C34 120.0(3) . . ?
C36 C35 H35 120.0 . . ?
C31 C36 H36 119.5 . . ?
C35 C36 C31 120.9(3) . . ?
C35 C36 H36 119.5 . . ?
C38 C37 P1 117.3(2) . . ?
C42 C37 C38 119.2(3) . . ?
C42 C37 P1 123.5(3) . . ?
C37 C38 H38 119.7 . . ?
C39 C38 C37 120.6(3) . . ?
C39 C38 H38 119.7 . . ?
C38 C39 H39 120.1 . . ?
C40 C39 C38 119.8(4) . . ?
C40 C39 H39 120.1 . . ?
C39 C40 H40 119.5 . . ?
C39 C40 C41 121.0(3) . . ?
C41 C40 H40 119.5 . . ?
C40 C41 H41 120.0 . . ?
C40 C41 C42 120.0(3) . . ?
C42 C41 H41 120.0 . . ?
C37 C42 C41 119.3(3) . . ?
C37 C42 H42 120.3 . . ?
C41 C42 H42 120.3 . . ?
C44 C43 C48 118.3(3) . . ?
C44 C43 P2 118.3(2) . . ?
C48 C43 P2 123.4(2) . . ?
C43 C44 H44 119.7 . . ?
C45 C44 C43 120.5(3) . . ?
C45 C44 H44 119.7 . . ?
C44 C45 H45 119.8 . . ?
C46 C45 C44 120.4(3) . . ?
C46 C45 H45 119.8 . . ?
C45 C46 H46 120.0 . . ?
C45 C46 C47 119.9(3) . . ?
C47 C46 H46 120.0 . . ?
C46 C47 H47 119.9 . . ?
C48 C47 C46 120.3(3) . . ?
C48 C47 H47 119.9 . . ?
C43 C48 H48 119.7 . . ?
C47 C48 C43 120.6(3) . . ?
C47 C48 H48 119.7 . . ?
C50 C49 C54 119.5(3) . . ?
C50 C49 P2 123.1(2) . . ?
C54 C49 P2 117.4(2) . . ?
C49 C50 H50 119.9 . . ?
C51 C50 C49 120.2(3) . . ?
C51 C50 H50 119.9 . . ?
C50 C51 H51 119.5 . . ?
C52 C51 C50 120.9(3) . . ?
C52 C51 H51 119.5 . . ?
C51 C52 H52 120.1 . . ?
C51 C52 C53 119.9(3) . . ?
C53 C52 H52 120.1 . . ?
C52 C53 H53 120.0 . . ?
C54 C53 C52 120.0(3) . . ?
C54 C53 H53 120.0 . . ?
C49 C54 H54 120.3 . . ?
C53 C54 C49 119.5(3) . . ?
C53 C54 H54 120.3 . . ?
C56 C55 C60 118.2(3) . . ?
C56 C55 P2 122.1(2) . . ?
C60 C55 P2 119.7(2) . . ?
C55 C56 H56 119.6 . . ?
C55 C56 C57 120.8(3) . . ?
C57 C56 H56 119.6 . . ?
C56 C57 H57 119.9 . . ?
C58 C57 C56 120.3(3) . . ?
C58 C57 H57 119.9 . . ?
C57 C58 H58 120.1 . . ?
C57 C58 C59 119.8(3) . . ?
C59 C58 H58 120.1 . . ?
C58 C59 H59 120.2 . . ?
C60 C59 C58 119.6(3) . . ?
C60 C59 H59 120.2 . . ?
C55 C60 H60 119.4 . . ?
C59 C60 C55 121.3(3) . . ?
C59 C60 H60 119.4 . . ?
C1 O1 Ru1 89.1(2) . . ?
C1A O1A Ru1 111.0(19) . . ?
C1 O2 Ru1 93.4(2) . . ?
C9 O3 Ru1 123.3(3) . . ?
C9A O4A Ru1 100.2(17) . . ?
C25 P1 Ru1 114.36(9) . . ?
C31 P1 C25 105.48(13) . . ?
C31 P1 Ru1 113.71(10) . . ?
C37 P1 C25 103.72(13) . . ?
C37 P1 C31 105.11(13) . . ?
C37 P1 Ru1 113.43(10) . . ?
C43 P2 C55 104.65(13) . . ?
C43 P2 Ru1 116.57(9) . . ?
C49 P2 C43 104.38(13) . . ?
C49 P2 C55 103.36(13) . . ?
C49 P2 Ru1 112.98(10) . . ?
C55 P2 Ru1 113.57(9) . . ?
C17 Ru1 C1 136.57(13) . . ?
C17 Ru1 O1 166.20(12) . . ?
C17 Ru1 O1A 143.8(6) . . ?
C17 Ru1 O2 106.55(12) . . ?
C17 Ru1 O3 101.94(13) . . ?
C17 Ru1 O4A 70.4(5) . . ?
C17 Ru1 P1 85.98(12) . . ?
C17 Ru1 P2 91.34(12) . . ?
C17A Ru1 C1 121.5(9) . . ?
C17A Ru1 C17 16.3(9) . . ?
C17A Ru1 O1 150.3(9) . . ?
C17A Ru1 O1A 128.8(11) . . ?
C17A Ru1 O2 91.7(9) . . ?
C17A Ru1 O3 117.0(9) . . ?
C17A Ru1 O4A 85.2(11) . . ?
C17A Ru1 P1 92.4(11) . . ?
C17A Ru1 P2 85.2(11) . . ?
O1 Ru1 C1 29.76(10) . . ?
O1 Ru1 P1 95.02(6) . . ?
O1 Ru1 P2 87.73(6) . . ?
O1A Ru1 C1 7.3(6) . . ?
O1A Ru1 O1 22.6(6) . . ?
O1A Ru1 O2 37.3(6) . . ?
O1A Ru1 O3 114.1(6) . . ?
O1A Ru1 O4A 145.8(8) . . ?
O1A Ru1 P1 91.1(6) . . ?
O1A Ru1 P2 91.4(6) . . ?
O2 Ru1 C1 30.02(10) . . ?
O2 Ru1 O1 59.76(8) . . ?
O2 Ru1 O4A 176.9(5) . . ?
O2 Ru1 P1 88.70(6) . . ?
O2 Ru1 P2 92.63(6) . . ?
O3 Ru1 C1 121.38(11) . . ?
O3 Ru1 O1 91.84(9) . . ?
O3 Ru1 O2 151.20(10) . . ?
O3 Ru1 O4A 31.9(5) . . ?
O3 Ru1 P1 89.18(7) . . ?
O3 Ru1 P2 90.82(7) . . ?
O4A Ru1 C1 153.0(5) . . ?
O4A Ru1 O1 123.3(5) . . ?
O4A Ru1 P1 91.3(5) . . ?
O4A Ru1 P2 87.2(5) . . ?
P1 Ru1 C1 91.44(7) . . ?
P1 Ru1 P2 177.25(3) . . ?
P2 Ru1 C1 90.91(7) . . ?
C115 C120 H120 119.7 . . ?
C119 C120 H120 119.7 . . ?
C119 C120 C115 120.6(3) . . ?
C62 C61 Ru2 176.7(3) . . ?
O5 C61 C62 120.5(3) . . ?
O5 C61 Ru2 56.62(15) . . ?
O6 C61 C62 121.3(3) . . ?
O6 C61 O5 118.2(3) . . ?
O6 C61 Ru2 61.54(16) . . ?
O5A C61A C62A 118(4) . . ?
O5A C61A O6A 131(5) . . ?
O6A C61A C62A 110(4) . . ?
C63 C62 C61 121.1(3) . . ?
C63 C62 C67 118.8(3) . . ?
C67 C62 C61 120.1(3) . . ?
C67A C62A C61A 126(3) . . ?
C67A C62A C63A 120.0 . . ?
C63A C62A C61A 114(3) . . ?
C62A C67A H67A 120.0 . . ?
C66A C67A C62A 120.0 . . ?
C66A C67A H67A 120.0 . . ?
C67A C66A H66A 120.0 . . ?
C65A C66A C67A 120.0 . . ?
C65A C66A H66A 120.0 . . ?
C66A C65A C64A 120.0 . . ?
C66A C65A C68A 120.1(9) . . ?
C64A C65A C68A 119.7(9) . . ?
C65A C64A H64A 120.0 . . ?
C63A C64A C65A 120.0 . . ?
C63A C64A H64A 120.0 . . ?
C62A C63A H63A 120.0 . . ?
C64A C63A C62A 120.0 . . ?
C64A C63A H63A 120.0 . . ?
C62 C63 H63 119.9 . . ?
C64 C63 C62 120.3(3) . . ?
C64 C63 H63 119.9 . . ?
C63 C64 H64 119.3 . . ?
C63 C64 C65 121.4(3) . . ?
C65 C64 H64 119.3 . . ?
C64 C65 C66 117.9(3) . . ?
C64 C65 C68 120.7(3) . . ?
C66 C65 C68 121.3(3) . . ?
C65 C66 H66 119.3 . . ?
C67 C66 C65 121.3(3) . . ?
C67 C66 H66 119.3 . . ?
C62 C67 H67 119.8 . . ?
C66 C67 C62 120.3(3) . . ?
C66 C67 H67 119.8 . . ?
C65A C68A H68D 109.5 . . ?
C65A C68A H68E 109.5 . . ?
C65A C68A H68F 109.5 . . ?
H68D C68A H68E 109.5 . . ?
H68D C68A H68F 109.5 . . ?
H68E C68A H68F 109.5 . . ?
O7 C69 C70 114.5(3) . . ?
O8 C69 C70 120.4(3) . . ?
O8 C69 O7 125.0(3) . . ?
O7A C69A C70A 126(4) . . ?
O7A C69A O8A 111(3) . . ?
O8A C69A C70A 123(4) . . ?
C71 C70 C69 122.6(4) . . ?
C75 C70 C69 118.8(4) . . ?
C75 C70 C71 118.6(3) . . ?
C71A C70A C69A 126(4) . . ?
C71A C70A C75A 120.0 . . ?
C75A C70A C69A 114(4) . . ?
C70A C71A H71A 120.0 . . ?
C70A C71A C72A 120.0 . . ?
C72A C71A H71A 120.0 . . ?
C71A C72A H72A 120.0 . . ?
C71A C72A C73A 120.0 . . ?
C73A C72A H72A 120.0 . . ?
C72A C73A C76A 110(5) . . ?
C74A C73A C72A 120.0 . . ?
C74A C73A C76A 130(5) . . ?
C73A C74A H74A 120.0 . . ?
C75A C74A C73A 120.0 . . ?
C75A C74A H74A 120.0 . . ?
C70A C75A H75A 120.0 . . ?
C74A C75A C70A 120.0 . . ?
C74A C75A H75A 120.0 . . ?
C70 C71 H71 119.8 . . ?
C70 C71 C72 120.3(3) . . ?
C72 C71 H71 119.8 . . ?
C71 C72 H72 119.5 . . ?
C73 C72 C71 120.9(3) . . ?
C73 C72 H72 119.5 . . ?
C72 C73 C76 121.2(3) . . ?
C74 C73 C72 118.0(3) . . ?
C74 C73 C76 120.7(3) . . ?
C73 C74 H74 119.3 . . ?
C75 C74 C73 121.5(3) . . ?
C75 C74 H74 119.3 . . ?
C70 C75 H75 119.7 . . ?
C74 C75 C70 120.7(3) . . ?
C74 C75 H75 119.7 . . ?
C73A C76A H76D 109.5 . . ?
C73A C76A H76E 109.5 . . ?
C73A C76A H76F 109.5 . . ?
H76D C76A H76E 109.5 . . ?
H76D C76A H76F 109.5 . . ?
H76E C76A H76F 109.5 . . ?
C78 C77 Ru2 177.5(3) . . ?
C78A C77A Ru2 176(3) . . ?
C77 C78 H78 116.1 . . ?
C77 C78 C79 127.8(3) . . ?
C79 C78 H78 116.1 . . ?
C77A C78A H78A 114.5 . . ?
C80A C78A C77A 131(4) . . ?
C80A C78A H78A 114.5 . . ?
C80 C79 C78 122.7(3) . . ?
C80 C79 C84 117.6(3) . . ?
C84 C79 C78 119.7(3) . . ?
C79 C80 H80 119.5 . . ?
C81 C80 C79 120.9(3) . . ?
C81 C80 H80 119.5 . . ?
C81A C80A C78A 126(3) . . ?
C81A C80A C79A 120.0 . . ?
C79A C80A C78A 114(3) . . ?
C80A C81A H81A 120.0 . . ?
C82A C81A C80A 120.0 . . ?
C82A C81A H81A 120.0 . . ?
C81A C82A H82A 120.0 . . ?
C83A C82A C81A 120.0 . . ?
C83A C82A H82A 120.0 . . ?
C82A C83A H83A 120.0 . . ?
C82A C83A C84A 120.0 . . ?
C84A C83A H83A 120.0 . . ?
C83A C84A H84A 120.0 . . ?
C83A C84A C79A 120.0 . . ?
C79A C84A H84A 120.0 . . ?
C80A C79A H79A 120.0 . . ?
C84A C79A C80A 120.0 . . ?
C84A C79A H79A 120.0 . . ?
C80 C81 H81 119.9 . . ?
C82 C81 C80 120.2(4) . . ?
C82 C81 H81 119.9 . . ?
C81 C82 H82 120.1 . . ?
C83 C82 C81 119.8(4) . . ?
C83 C82 H82 120.1 . . ?
C82 C83 H83 119.9 . . ?
C82 C83 C84 120.3(3) . . ?
C84 C83 H83 119.9 . . ?
C79 C84 H84 119.5 . . ?
C83 C84 C79 121.1(3) . . ?
C83 C84 H84 119.5 . . ?
C86 C85 C90 119.3(3) . . ?
C86 C85 P3 118.2(2) . . ?
C90 C85 P3 122.3(2) . . ?
C85 C86 H86 120.0 . . ?
C87 C86 C85 120.0(3) . . ?
C87 C86 H86 120.0 . . ?
C86 C87 H87 119.7 . . ?
C88 C87 C86 120.7(3) . . ?
C88 C87 H87 119.7 . . ?
C87 C88 H88 120.2 . . ?
C89 C88 C87 119.5(3) . . ?
C89 C88 H88 120.2 . . ?
C88 C89 H89 119.7 . . ?
C88 C89 C90 120.7(3) . . ?
C90 C89 H89 119.7 . . ?
C85 C90 H90 120.1 . . ?
C89 C90 C85 119.8(3) . . ?
C89 C90 H90 120.1 . . ?
C92 C91 C96 118.9(3) . . ?
C92 C91 P3 121.9(2) . . ?
C96 C91 P3 119.2(2) . . ?
C91 C92 H92 119.7 . . ?
C91 C92 C93 120.7(3) . . ?
C93 C92 H92 119.7 . . ?
C92 C93 H93 120.0 . . ?
C94 C93 C92 120.0(3) . . ?
C94 C93 H93 120.0 . . ?
C93 C94 H94 120.2 . . ?
C93 C94 C95 119.7(3) . . ?
C95 C94 H94 120.2 . . ?
C94 C95 H95 119.7 . . ?
C96 C95 C94 120.6(3) . . ?
C96 C95 H95 119.7 . . ?
C91 C96 H96 119.9 . . ?
C95 C96 C91 120.2(3) . . ?
C95 C96 H96 119.9 . . ?
C98 C97 C102 119.2(3) . . ?
C98 C97 P3 122.7(2) . . ?
C102 C97 P3 118.1(2) . . ?
C97 C98 H98 119.8 . . ?
C97 C98 C99 120.5(3) . . ?
C99 C98 H98 119.8 . . ?
C98 C99 H99 120.0 . . ?
C100 C99 C98 119.9(3) . . ?
C100 C99 H99 120.0 . . ?
C99 C100 H100 120.1 . . ?
C101 C100 C99 119.8(3) . . ?
C101 C100 H100 120.1 . . ?
C100 C101 H101 119.7 . . ?
C100 C101 C102 120.6(3) . . ?
C102 C101 H101 119.7 . . ?
C97 C102 H102 120.1 . . ?
C101 C102 C97 119.9(3) . . ?
C101 C102 H102 120.1 . . ?
C104 C103 P4 119.7(2) . . ?
C108 C103 C104 118.7(2) . . ?
C108 C103 P4 121.6(2) . . ?
C103 C104 H104 119.8 . . ?
C105 C104 C103 120.4(3) . . ?
C105 C104 H104 119.8 . . ?
C104 C105 H105 119.8 . . ?
C106 C105 C104 120.4(3) . . ?
C106 C105 H105 119.8 . . ?
C105 C106 H106 120.1 . . ?
C107 C106 C105 119.8(3) . . ?
C107 C106 H106 120.1 . . ?
C106 C107 H107 120.0 . . ?
C106 C107 C108 120.1(3) . . ?
C108 C107 H107 120.0 . . ?
C103 C108 C107 120.6(3) . . ?
C103 C108 H108 119.7 . . ?
C107 C108 H108 119.7 . . ?
C110 C109 P4 118.7(2) . . ?
C114 C109 C110 118.9(3) . . ?
C114 C109 P4 122.4(2) . . ?
C109 C110 H110 120.0 . . ?
C111 C110 C109 120.0(3) . . ?
C111 C110 H110 120.0 . . ?
C110 C111 H111 119.7 . . ?
C112 C111 C110 120.7(3) . . ?
C112 C111 H111 119.7 . . ?
C111 C112 H112 120.0 . . ?
C113 C112 C111 119.9(3) . . ?
C113 C112 H112 120.0 . . ?
C112 C113 H113 120.2 . . ?
C112 C113 C114 119.7(3) . . ?
C114 C113 H113 120.2 . . ?
C109 C114 H114 119.6 . . ?
C113 C114 C109 120.9(3) . . ?
C113 C114 H114 119.6 . . ?
C120 C115 C116 119.0(3) . . ?
C120 C115 P4 122.8(2) . . ?
C116 C115 P4 117.99(19) . . ?
C115 C116 H116 120.0 . . ?
C117 C116 C115 120.0(3) . . ?
C117 C116 H116 120.0 . . ?
C116 C117 H117 119.8 . . ?
C118 C117 C116 120.3(3) . . ?
C118 C117 H117 119.8 . . ?
C117 C118 H118 120.1 . . ?
C117 C118 C119 119.8(3) . . ?
C119 C118 H118 120.1 . . ?
C120 C119 C118 120.1(3) . . ?
C120 C119 H119 119.9 . . ?
C118 C119 H119 119.9 . . ?
C61 O5 Ru2 93.16(19) . . ?
C61 O6 Ru2 88.72(19) . . ?
C61A O6A Ru2 124(4) . . ?
C69 O7 Ru2 127.0(2) . . ?
C69A O7A Ru2 93(3) . . ?
C69A O8A Ru2 100(2) . . ?
C85 P3 C91 102.65(12) . . ?
C85 P3 C97 104.47(12) . . ?
C85 P3 Ru2 116.84(9) . . ?
C91 P3 C97 104.82(13) . . ?
C91 P3 Ru2 114.69(9) . . ?
C97 P3 Ru2 112.07(9) . . ?
C103 P4 Ru2 113.21(8) . . ?
C109 P4 C103 102.48(12) . . ?
C109 P4 Ru2 117.83(9) . . ?
C115 P4 C103 102.74(12) . . ?
C115 P4 C109 104.36(12) . . ?
C115 P4 Ru2 114.43(9) . . ?
C77 Ru2 C61 136.67(12) . . ?
C77 Ru2 O5 106.66(10) . . ?
C77 Ru2 O6 165.72(11) . . ?
C77 Ru2 O6A 139.1(12) . . ?
C77 Ru2 O7 100.65(11) . . ?
C77 Ru2 O7A 125.3(7) . . ?
C77 Ru2 O8A 71.8(9) . . ?
C77 Ru2 P3 86.99(9) . . ?
C77 Ru2 P4 90.48(9) . . ?
C77A Ru2 C61 97.2(13) . . ?
C77A Ru2 C77 39.9(13) . . ?
C77A Ru2 O5 68.1(12) . . ?
C77A Ru2 O6 125.8(13) . . ?
C77A Ru2 O6A 100.0(17) . . ?
C77A Ru2 O7 139.8(13) . . ?
C77A Ru2 O7A 165.2(14) . . ?
C77A Ru2 O8A 110.3(15) . . ?
C77A Ru2 P3 94.3(13) . . ?
C77A Ru2 P4 82.9(13) . . ?
O5 Ru2 C61 30.22(9) . . ?
O5 Ru2 O6 59.96(7) . . ?
O5 Ru2 O7A 125.3(7) . . ?
O5 Ru2 P3 86.20(6) . . ?
O5 Ru2 P4 93.33(6) . . ?
O6 Ru2 C61 29.74(9) . . ?
O6 Ru2 O7A 68.9(7) . . ?
O6 Ru2 P3 96.47(5) . . ?
O6 Ru2 P4 85.68(5) . . ?
O6A Ru2 C61 3.3(11) . . ?
O6A Ru2 O5 32.5(11) . . ?
O6A Ru2 O6 27.6(11) . . ?
O6A Ru2 O7 120.0(11) . . ?
O6A Ru2 O7A 94.2(13) . . ?
O6A Ru2 O8A 149.0(14) . . ?
O6A Ru2 P3 89.7(10) . . ?
O6A Ru2 P4 91.3(10) . . ?
O7 Ru2 C61 122.66(11) . . ?
O7 Ru2 O5 152.06(8) . . ?
O7 Ru2 O6 93.25(8) . . ?
O7 Ru2 O7A 26.9(7) . . ?
O7 Ru2 O8A 29.6(9) . . ?
O7 Ru2 P3 89.44(6) . . ?
O7 Ru2 P4 92.26(6) . . ?
O7A Ru2 C61 97.1(7) . . ?
O7A Ru2 P3 81.3(6) . . ?
O7A Ru2 P4 101.2(6) . . ?
O8A Ru2 C61 151.2(9) . . ?
O8A Ru2 O5 178.4(9) . . ?
O8A Ru2 O6 121.5(9) . . ?
O8A Ru2 O7A 56.3(11) . . ?
O8A Ru2 P3 94.3(9) . . ?
O8A Ru2 P4 86.1(9) . . ?
P3 Ru2 C61 91.79(8) . . ?
P3 Ru2 P4 177.18(3) . . ?
P4 Ru2 C61 89.18(8) . . ?

loop_
_geom_torsion_atom_site_label_1
_geom_torsion_atom_site_label_2
_geom_torsion_atom_site_label_3
_geom_torsion_atom_site_label_4
_geom_torsion
_geom_torsion_site_symmetry_1
_geom_torsion_site_symmetry_2
_geom_torsion_site_symmetry_3
_geom_torsion_site_symmetry_4
_geom_torsion_publ_flag
C1 C2 C3 C4 -178.5(5) . . . . ?
C1 C2 C7 C6 -179.6(5) . . . . ?
C1 O1 Ru1 C17 9.4(6) . . . . ?
C1 O1 Ru1 C17A 20(2) . . . . ?
C1 O1 Ru1 O1A -3.3(15) . . . . ?
C1 O1 Ru1 O2 1.44(17) . . . . ?
C1 O1 Ru1 O3 -173.45(18) . . . . ?
C1 O1 Ru1 O4A -179.0(6) . . . . ?
C1 O1 Ru1 P1 -84.11(17) . . . . ?
C1 O1 Ru1 P2 95.81(17) . . . . ?
C1 O2 Ru1 C17 -179.4(2) . . . . ?
C1 O2 Ru1 C17A -172.5(11) . . . . ?
C1 O2 Ru1 O1 -1.43(16) . . . . ?
C1 O2 Ru1 O1A 1.6(10) . . . . ?
C1 O2 Ru1 O3 9.2(3) . . . . ?
C1 O2 Ru1 P1 95.14(17) . . . . ?
C1 O2 Ru1 P2 -87.26(17) . . . . ?
C1A C2A C3A C4A -180(4) . . . . ?
C1A C2A C7A C6A 180(4) . . . . ?
C1A O1A Ru1 C1 10(4) . . . . ?
C1A O1A Ru1 C17 2(2) . . . . ?
C1A O1A Ru1 C17A 11(3) . . . . ?
C1A O1A Ru1 O1 177(3) . . . . ?
C1A O1A Ru1 O2 3.8(14) . . . . ?
C1A O1A Ru1 O3 -172.2(16) . . . . ?
C1A O1A Ru1 O4A -176.6(16) . . . . ?
C1A O1A Ru1 P1 -82.6(18) . . . . ?
C1A O1A Ru1 P2 96.3(18) . . . . ?
C2 C1 O1 Ru1 176.7(4) . . . . ?
C2 C1 O2 Ru1 -176.6(4) . . . . ?
C2 C3 C4 C5 -1.7(6) . . . . ?
C2A C1A O1A Ru1 178(2) . . . . ?
C2A C3A C4A C5A 0.0 . . . . ?
C3A C2A C7A C6A 0.0 . . . . ?
C3A C4A C5A C6A 0.0 . . . . ?
C4A C5A C6A C7A 0.0 . . . . ?
C5A C6A C7A C2A 0.0 . . . . ?
C7A C2A C3A C4A 0.0 . . . . ?
C3 C2 C7 C6 1.3(5) . . . . ?
C3 C4 C5 C6 0.8(5) . . . . ?
C3 C4 C5 C8 -177.9(6) . . . . ?
C4 C5 C6 C7 1.2(5) . . . . ?
C5 C6 C7 C2 -2.3(5) . . . . ?
C7 C2 C3 C4 0.6(5) . . . . ?
C8 C5 C6 C7 179.8(5) . . . . ?
C9 C10 C11 C12 -174.4(4) . . . . ?
C9 C10 C15 C14 175.7(4) . . . . ?
C9 O3 Ru1 C1 -174.0(2) . . . . ?
C9 O3 Ru1 C17 9.1(3) . . . . ?
C9 O3 Ru1 C17A 2.6(13) . . . . ?
C9 O3 Ru1 O1 -170.2(2) . . . . ?
C9 O3 Ru1 O1A -174.3(7) . . . . ?
C9 O3 Ru1 O2 -179.4(2) . . . . ?
C9 O3 Ru1 O4A 1.0(10) . . . . ?
C9 O3 Ru1 P1 94.8(2) . . . . ?
C9 O3 Ru1 P2 -82.4(2) . . . . ?
C9A C10A C11A C12A -175(3) . . . . ?
C9A C10A C15A C14A 174(3) . . . . ?
C9A O4A Ru1 C1 13(2) . . . . ?
C9A O4A Ru1 C17 -167.6(15) . . . . ?
C9A O4A Ru1 C17A -174.6(18) . . . . ?
C9A O4A Ru1 O1 14.5(16) . . . . ?
C9A O4A Ru1 O1A 12(2) . . . . ?
C9A O4A Ru1 O3 4.0(11) . . . . ?
C9A O4A Ru1 P1 -82.3(14) . . . . ?
C9A O4A Ru1 P2 100.0(14) . . . . ?
C10 C9 O3 Ru1 -179.4(2) . . . . ?
C10 C11 C12 C13 -0.7(5) . . . . ?
C10A C9A O4A Ru1 178(2) . . . . ?
C10A C11A C12A C13A 0.0 . . . . ?
C11A C10A C15A C14A 0.0 . . . . ?
C11A C12A C13A C14A 0.0 . . . . ?
C11A C12A C13A C16A 170(5) . . . . ?
C12A C13A C14A C15A 0.0 . . . . ?
C13A C14A C15A C10A 0.0 . . . . ?
C15A C10A C11A C12A 0.0 . . . . ?
C11 C10 C15 C14 -0.5(5) . . . . ?
C11 C12 C13 C14 -1.2(5) . . . . ?
C11 C12 C13 C16 177.8(6) . . . . ?
C12 C13 C14 C15 2.3(5) . . . . ?
C13 C14 C15 C10 -1.4(5) . . . . ?
C15 C10 C11 C12 1.5(5) . . . . ?
C16 C13 C14 C15 -176.8(7) . . . . ?
C16A C13A C14A C15A -170(5) . . . . ?
C17 C18 C19 C20 -176.5(4) . . . . ?
C17 C18 C19 C24 6.0(6) . . . . ?
C17A C18A C24A C19A 4(3) . . . . ?
C17A C18A C24A C23A -177(2) . . . . ?
C18 C19 C20 C21 -177.5(4) . . . . ?
C18 C19 C24 C23 177.4(4) . . . . ?
C18A C17A Ru1 C1 5(3) . . . . ?
C18A C17A Ru1 C17 165(6) . . . . ?
C18A C17A Ru1 O1 -6(4) . . . . ?
C18A C17A Ru1 O1A 5(3) . . . . ?
C18A C17A Ru1 O2 10(2) . . . . ?
C18A C17A Ru1 O3 -171.1(19) . . . . ?
C18A C17A Ru1 O4A -170(3) . . . . ?
C18A C17A Ru1 P1 99(2) . . . . ?
C18A C17A Ru1 P2 -83(2) . . . . ?
C18A C24A C19A C20A 179(2) . . . . ?
C18A C24A C23A C22A -178(3) . . . . ?
C19 C20 C21 C22 0.1(6) . . . . ?
C20 C19 C24 C23 -0.2(5) . . . . ?
C20 C21 C22 C23 -0.4(6) . . . . ?
C21 C22 C23 C24 0.4(6) . . . . ?
C22 C23 C24 C19 -0.1(6) . . . . ?
C24 C19 C20 C21 0.2(5) . . . . ?
C24A C19A C20A C21A 0.0 . . . . ?
C19A C24A C23A C22A 0.0 . . . . ?
C19A C20A C21A C22A 0.0 . . . . ?
C20A C21A C22A C23A 0.0 . . . . ?
C21A C22A C23A C24A 0.0 . . . . ?
C23A C24A C19A C20A 0.0 . . . . ?
C25 C26 C27 C28 -1.2(5) . . . . ?
C25 P1 Ru1 C1 -145.12(13) . . . . ?
C25 P1 Ru1 C17 78.29(15) . . . . ?
C25 P1 Ru1 C17A 93.3(9) . . . . ?
C25 P1 Ru1 O1 -115.53(12) . . . . ?
C25 P1 Ru1 O1A -137.8(6) . . . . ?
C25 P1 Ru1 O2 -175.02(12) . . . . ?
C25 P1 Ru1 O3 -23.75(13) . . . . ?
C25 P1 Ru1 O4A 8.0(5) . . . . ?
C26 C25 C30 C29 0.6(4) . . . . ?
C26 C25 P1 C31 -119.7(2) . . . . ?
C26 C25 P1 C37 -9.5(3) . . . . ?
C26 C25 P1 Ru1 114.6(2) . . . . ?
C26 C27 C28 C29 0.3(5) . . . . ?
C27 C28 C29 C30 1.0(5) . . . . ?
C28 C29 C30 C25 -1.5(4) . . . . ?
C30 C25 C26 C27 0.8(5) . . . . ?
C30 C25 P1 C31 64.6(2) . . . . ?
C30 C25 P1 C37 174.8(2) . . . . ?
C30 C25 P1 Ru1 -61.1(2) . . . . ?
C31 C32 C33 C34 -0.8(5) . . . . ?
C31 P1 Ru1 C1 93.62(13) . . . . ?
C31 P1 Ru1 C17 -42.97(15) . . . . ?
C31 P1 Ru1 C17A -28.0(9) . . . . ?
C31 P1 Ru1 O1 123.21(11) . . . . ?
C31 P1 Ru1 O1A 100.9(6) . . . . ?
C31 P1 Ru1 O2 63.72(12) . . . . ?
C31 P1 Ru1 O3 -145.01(12) . . . . ?
C31 P1 Ru1 O4A -113.2(5) . . . . ?
C32 C31 C36 C35 1.5(5) . . . . ?
C32 C31 P1 C25 -2.3(3) . . . . ?
C32 C31 P1 C37 -111.5(2) . . . . ?
C32 C31 P1 Ru1 123.8(2) . . . . ?
C32 C33 C34 C35 0.0(5) . . . . ?
C33 C34 C35 C36 1.6(5) . . . . ?
C34 C35 C36 C31 -2.4(5) . . . . ?
C36 C31 C32 C33 0.1(4) . . . . ?
C36 C31 P1 C25 178.6(2) . . . . ?
C36 C31 P1 C37 69.3(3) . . . . ?
C36 C31 P1 Ru1 -55.3(2) . . . . ?
C37 C38 C39 C40 -1.3(5) . . . . ?
C37 P1 Ru1 C1 -26.43(13) . . . . ?
C37 P1 Ru1 C17 -163.02(15) . . . . ?
C37 P1 Ru1 C17A -148.0(9) . . . . ?
C37 P1 Ru1 O1 3.17(12) . . . . ?
C37 P1 Ru1 O1A -19.1(6) . . . . ?
C37 P1 Ru1 O2 -56.33(12) . . . . ?
C37 P1 Ru1 O3 94.95(13) . . . . ?
C37 P1 Ru1 O4A 126.7(5) . . . . ?
C38 C37 C42 C41 0.1(4) . . . . ?
C38 C37 P1 C25 74.7(2) . . . . ?
C38 C37 P1 C31 -174.8(2) . . . . ?
C38 C37 P1 Ru1 -50.0(2) . . . . ?
C38 C39 C40 C41 1.8(5) . . . . ?
C39 C40 C41 C42 -1.4(5) . . . . ?
C40 C41 C42 C37 0.4(5) . . . . ?
C42 C37 C38 C39 0.4(5) . . . . ?
C42 C37 P1 C25 -103.6(3) . . . . ?
C42 C37 P1 C31 7.0(3) . . . . ?
C42 C37 P1 Ru1 131.8(2) . . . . ?
C43 C44 C45 C46 -2.2(5) . . . . ?
C43 P2 Ru1 C1 -139.52(13) . . . . ?
C43 P2 Ru1 C17 -2.89(15) . . . . ?
C43 P2 Ru1 C17A -18.0(9) . . . . ?
C43 P2 Ru1 O1 -169.11(12) . . . . ?
C43 P2 Ru1 O1A -146.8(6) . . . . ?
C43 P2 Ru1 O2 -109.53(12) . . . . ?
C43 P2 Ru1 O3 99.07(13) . . . . ?
C43 P2 Ru1 O4A 67.4(5) . . . . ?
C44 C43 C48 C47 -0.5(4) . . . . ?
C44 C43 P2 C49 64.2(2) . . . . ?
C44 C43 P2 C55 172.5(2) . . . . ?
C44 C43 P2 Ru1 -61.1(2) . . . . ?
C44 C45 C46 C47 1.0(5) . . . . ?
C45 C46 C47 C48 0.4(5) . . . . ?
C46 C47 C48 C43 -0.6(4) . . . . ?
C48 C43 C44 C45 1.9(4) . . . . ?
C48 C43 P2 C49 -117.4(2) . . . . ?
C48 C43 P2 C55 -9.1(3) . . . . ?
C48 C43 P2 Ru1 117.2(2) . . . . ?
C49 C50 C51 C52 1.8(5) . . . . ?
C49 P2 Ru1 C1 99.57(13) . . . . ?
C49 P2 Ru1 C17 -123.80(15) . . . . ?
C49 P2 Ru1 C17A -138.9(9) . . . . ?
C49 P2 Ru1 O1 69.98(12) . . . . ?
C49 P2 Ru1 O1A 92.3(6) . . . . ?
C49 P2 Ru1 O2 129.56(12) . . . . ?
C49 P2 Ru1 O3 -21.83(13) . . . . ?
C49 P2 Ru1 O4A -53.5(5) . . . . ?
C50 C49 C54 C53 0.1(5) . . . . ?
C50 C49 P2 C43 10.2(3) . . . . ?
C50 C49 P2 C55 -99.0(3) . . . . ?
C50 C49 P2 Ru1 137.8(2) . . . . ?
C50 C51 C52 C53 -2.4(5) . . . . ?
C51 C52 C53 C54 1.8(5) . . . . ?
C52 C53 C54 C49 -0.7(5) . . . . ?
C54 C49 C50 C51 -0.7(5) . . . . ?
C54 C49 P2 C43 -171.6(2) . . . . ?
C54 C49 P2 C55 79.1(3) . . . . ?
C54 C49 P2 Ru1 -44.0(3) . . . . ?
C55 C56 C57 C58 -0.8(5) . . . . ?
C55 P2 Ru1 C1 -17.74(13) . . . . ?
C55 P2 Ru1 C17 118.89(15) . . . . ?
C55 P2 Ru1 C17A 103.8(9) . . . . ?
C55 P2 Ru1 O1 -47.33(12) . . . . ?
C55 P2 Ru1 O1A -25.0(6) . . . . ?
C55 P2 Ru1 O2 12.25(12) . . . . ?
C55 P2 Ru1 O3 -139.14(13) . . . . ?
C55 P2 Ru1 O4A -170.8(5) . . . . ?
C56 C55 C60 C59 -0.2(4) . . . . ?
C56 C55 P2 C43 -113.0(3) . . . . ?
C56 C55 P2 C49 -4.0(3) . . . . ?
C56 C55 P2 Ru1 118.8(2) . . . . ?
C56 C57 C58 C59 -0.6(5) . . . . ?
C57 C58 C59 C60 1.6(5) . . . . ?
C58 C59 C60 C55 -1.1(4) . . . . ?
C60 C55 C56 C57 1.2(5) . . . . ?
C60 C55 P2 C43 70.1(2) . . . . ?
C60 C55 P2 C49 179.1(2) . . . . ?
C60 C55 P2 Ru1 -58.1(2) . . . . ?
O1 C1 C2 C3 -22.9(6) . . . . ?
O1 C1 C2 C7 158.0(4) . . . . ?
O1 C1 O2 Ru1 2.5(3) . . . . ?
O1 C1 Ru1 C17 -176.7(2) . . . . ?
O1 C1 Ru1 C17A -168.7(13) . . . . ?
O1 C1 Ru1 O1A 10(5) . . . . ?
O1 C1 Ru1 O2 -177.5(3) . . . . ?
O1 C1 Ru1 O3 7.7(2) . . . . ?
O1 C1 Ru1 O4A 1.8(11) . . . . ?
O1 C1 Ru1 P1 97.59(16) . . . . ?
O1 C1 Ru1 P2 -83.83(16) . . . . ?
O1A C1A C2A C3A -26(4) . . . . ?
O1A C1A C2A C7A 154(3) . . . . ?
O2 C1 C2 C3 156.1(4) . . . . ?
O2 C1 C2 C7 -23.0(6) . . . . ?
O2 C1 O1 Ru1 -2.3(3) . . . . ?
O2 C1 Ru1 C17 0.8(3) . . . . ?
O2 C1 Ru1 C17A 8.8(13) . . . . ?
O2 C1 Ru1 O1 177.5(3) . . . . ?
O2 C1 Ru1 O1A -172(5) . . . . ?
O2 C1 Ru1 O3 -174.81(16) . . . . ?
O2 C1 Ru1 O4A 179.3(11) . . . . ?
O2 C1 Ru1 P1 -84.89(17) . . . . ?
O2 C1 Ru1 P2 93.68(17) . . . . ?
O2A C1A C2A C3A 154(3) . . . . ?
O2A C1A C2A C7A -26(4) . . . . ?
O2A C1A O1A Ru1 -1(5) . . . . ?
O3 C9 C10 C11 -27.0(5) . . . . ?
O3 C9 C10 C15 157.1(4) . . . . ?
O3A C9A C10A C11A -33(4) . . . . ?
O3A C9A C10A C15A 152(3) . . . . ?
O3A C9A O4A Ru1 4(2) . . . . ?
O4 C9 C10 C11 152.9(3) . . . . ?
O4 C9 C10 C15 -23.0(5) . . . . ?
O4 C9 O3 Ru1 0.7(5) . . . . ?
O4A C9A C10A C11A 154(2) . . . . ?
O4A C9A C10A C15A -20(4) . . . . ?
P1 C25 C26 C27 -175.0(2) . . . . ?
P1 C25 C30 C29 176.4(2) . . . . ?
P1 C31 C32 C33 -179.1(2) . . . . ?
P1 C31 C36 C35 -179.2(3) . . . . ?
P1 C37 C38 C39 -177.9(2) . . . . ?
P1 C37 C42 C41 178.3(2) . . . . ?
P2 C43 C44 C45 -179.7(2) . . . . ?
P2 C43 C48 C47 -178.9(2) . . . . ?
P2 C49 C50 C51 177.5(2) . . . . ?
P2 C49 C54 C53 -178.1(2) . . . . ?
P2 C55 C56 C57 -175.7(3) . . . . ?
P2 C55 C60 C59 176.7(2) . . . . ?
Ru1 C17A C18A C24A -174(2) . . . . ?
C120 C115 C116 C117 -1.0(4) . . . . ?
C120 C115 P4 C103 91.6(2) . . . . ?
C120 C115 P4 C109 -15.0(3) . . . . ?
C120 C115 P4 Ru2 -145.3(2) . . . . ?
C61 C62 C63 C64 178.7(4) . . . . ?
C61 C62 C67 C66 -179.4(4) . . . . ?
C61 O5 Ru2 C77 174.14(19) . . . . ?
C61 O5 Ru2 C77A 163.6(14) . . . . ?
C61 O5 Ru2 O6 -0.42(17) . . . . ?
C61 O5 Ru2 O6A -5(2) . . . . ?
C61 O5 Ru2 O7 -18.5(3) . . . . ?
C61 O5 Ru2 O7A -23.6(8) . . . . ?
C61 O5 Ru2 P3 -100.15(17) . . . . ?
C61 O5 Ru2 P4 82.64(17) . . . . ?
C61 O6 Ru2 C77 -21.2(5) . . . . ?
C61 O6 Ru2 C77A -17.9(15) . . . . ?
C61 O6 Ru2 O5 0.43(17) . . . . ?
C61 O6 Ru2 O6A 5(2) . . . . ?
C61 O6 Ru2 O7 172.03(18) . . . . ?
C61 O6 Ru2 O7A 160.3(7) . . . . ?
C61 O6 Ru2 O8A -178.7(10) . . . . ?
C61 O6 Ru2 P3 82.23(17) . . . . ?
C61 O6 Ru2 P4 -95.94(17) . . . . ?
C61A C62A C67A C66A -176(6) . . . . ?
C61A C62A C63A C64A 177(5) . . . . ?
C61A O6A Ru2 C61 -54(18) . . . . ?
C61A O6A Ru2 C77 -11(5) . . . . ?
C61A O6A Ru2 C77A -20(4) . . . . ?
C61A O6A Ru2 O5 -9(3) . . . . ?
C61A O6A Ru2 O6 179(5) . . . . ?
C61A O6A Ru2 O7 163(3) . . . . ?
C61A O6A Ru2 O7A 155(4) . . . . ?
C61A O6A Ru2 O8A 172(3) . . . . ?
C61A O6A Ru2 P3 74(4) . . . . ?
C61A O6A Ru2 P4 -103(4) . . . . ?
C62 C61 O5 Ru2 -178.2(3) . . . . ?
C62 C61 O6 Ru2 178.2(3) . . . . ?
C62 C63 C64 C65 0.8(5) . . . . ?
C62A C61A O6A Ru2 173(3) . . . . ?
C62A C67A C66A C65A 0.0 . . . . ?
C67A C62A C63A C64A 0.0 . . . . ?
C67A C66A C65A C64A 0.0 . . . . ?
C67A C66A C65A C68A -175(11) . . . . ?
C66A C65A C64A C63A 0.0 . . . . ?
C65A C64A C63A C62A 0.0 . . . . ?
C63A C62A C67A C66A 0.0 . . . . ?
C63 C62 C67 C66 -0.3(5) . . . . ?
C63 C64 C65 C66 -0.7(6) . . . . ?
C63 C64 C65 C68 178.3(7) . . . . ?
C64 C65 C66 C67 0.0(6) . . . . ?
C65 C66 C67 C62 0.5(6) . . . . ?
C67 C62 C63 C64 -0.4(5) . . . . ?
C68 C65 C66 C67 -179.0(8) . . . . ?
C68A C65A C64A C63A 175(11) . . . . ?
C69 C70 C71 C72 -177.5(3) . . . . ?
C69 C70 C75 C74 176.9(3) . . . . ?
C69 O7 Ru2 C61 163.5(2) . . . . ?
C69 O7 Ru2 C77 -17.9(3) . . . . ?
C69 O7 Ru2 C77A -9(2) . . . . ?
C69 O7 Ru2 O5 174.5(2) . . . . ?
C69 O7 Ru2 O6 158.8(2) . . . . ?
C69 O7 Ru2 O6A 165.9(12) . . . . ?
C69 O7 Ru2 O7A -176.3(15) . . . . ?
C69 O7 Ru2 O8A -5.1(18) . . . . ?
C69 O7 Ru2 P3 -104.7(2) . . . . ?
C69 O7 Ru2 P4 73.0(2) . . . . ?
C69A C70A C71A C72A -177(4) . . . . ?
C69A C70A C75A C74A 177(4) . . . . ?
C69A O7A Ru2 C61 170(3) . . . . ?
C69A O7A Ru2 C77 -19(3) . . . . ?
C69A O7A Ru2 C77A -25(7) . . . . ?
C69A O7A Ru2 O5 -178(3) . . . . ?
C69A O7A Ru2 O6 161(3) . . . . ?
C69A O7A Ru2 O6A 172(3) . . . . ?
C69A O7A Ru2 O7 7(2) . . . . ?
C69A O7A Ru2 O8A 2(3) . . . . ?
C69A O7A Ru2 P3 -99(3) . . . . ?
C69A O7A Ru2 P4 80(3) . . . . ?
C69A O8A Ru2 C61 -27(4) . . . . ?
C69A O8A Ru2 C77 160(3) . . . . ?
C69A O8A Ru2 C77A 171(3) . . . . ?
C69A O8A Ru2 O6 -26(3) . . . . ?
C69A O8A Ru2 O6A -22(4) . . . . ?
C69A O8A Ru2 O7 -7(2) . . . . ?
C69A O8A Ru2 O7A -2(2) . . . . ?
C69A O8A Ru2 P3 75(3) . . . . ?
C69A O8A Ru2 P4 -108(3) . . . . ?
C70 C69 O7 Ru2 171.53(19) . . . . ?
C70 C71 C72 C73 0.7(5) . . . . ?
C70A C69A O7A Ru2 177(4) . . . . ?
C70A C69A O8A Ru2 -177(4) . . . . ?
C70A C71A C72A C73A 0.0 . . . . ?
C71A C70A C75A C74A 0.0 . . . . ?
C71A C72A C73A C74A 0.0 . . . . ?
C71A C72A C73A C76A -178(5) . . . . ?
C72A C73A C74A C75A 0.0 . . . . ?
C73A C74A C75A C70A 0.0 . . . . ?
C75A C70A C71A C72A 0.0 . . . . ?
C71 C70 C75 C74 0.5(5) . . . . ?
C71 C72 C73 C74 0.5(5) . . . . ?
C71 C72 C73 C76 -178.4(4) . . . . ?
C72 C73 C74 C75 -1.2(5) . . . . ?
C73 C74 C75 C70 0.7(5) . . . . ?
C75 C70 C71 C72 -1.2(5) . . . . ?
C76 C73 C74 C75 177.7(4) . . . . ?
C76A C73A C74A C75A 177(6) . . . . ?
C77 C78 C79 C80 2.4(5) . . . . ?
C77 C78 C79 C84 -178.1(3) . . . . ?
C77A C78A C80A C81A -178(3) . . . . ?
C77A C78A C80A C79A 3(6) . . . . ?
C78 C79 C80 C81 177.9(3) . . . . ?
C78 C79 C84 C83 -178.3(3) . . . . ?
C78A C80A C81A C82A -179(4) . . . . ?
C78A C80A C79A C84A 179(4) . . . . ?
C79 C80 C81 C82 0.3(5) . . . . ?
C80 C79 C84 C83 1.2(5) . . . . ?
C80 C81 C82 C83 1.5(5) . . . . ?
C80A C81A C82A C83A 0.0 . . . . ?
C81A C80A C79A C84A 0.0 . . . . ?
C81A C82A C83A C84A 0.0 . . . . ?
C82A C83A C84A C79A 0.0 . . . . ?
C83A C84A C79A C80A 0.0 . . . . ?
C79A C80A C81A C82A 0.0 . . . . ?
C81 C82 C83 C84 -2.0(5) . . . . ?
C82 C83 C84 C79 0.6(5) . . . . ?
C84 C79 C80 C81 -1.6(5) . . . . ?
C85 C86 C87 C88 0.5(4) . . . . ?
C85 P3 Ru2 C61 23.09(13) . . . . ?
C85 P3 Ru2 C77 159.73(13) . . . . ?
C85 P3 Ru2 C77A 120.5(13) . . . . ?
C85 P3 Ru2 O5 52.81(11) . . . . ?
C85 P3 Ru2 O6 -6.37(11) . . . . ?
C85 P3 Ru2 O6A 20.5(11) . . . . ?
C85 P3 Ru2 O7 -99.57(12) . . . . ?
C85 P3 Ru2 O7A -73.8(7) . . . . ?
C85 P3 Ru2 O8A -128.8(9) . . . . ?
C86 C85 C90 C89 0.2(4) . . . . ?
C86 C85 P3 C91 -79.7(2) . . . . ?
C86 C85 P3 C97 171.2(2) . . . . ?
C86 C85 P3 Ru2 46.7(2) . . . . ?
C86 C87 C88 C89 0.2(4) . . . . ?
C87 C88 C89 C90 -0.8(4) . . . . ?
C88 C89 C90 C85 0.6(4) . . . . ?
C90 C85 C86 C87 -0.7(4) . . . . ?
C90 C85 P3 C91 94.9(2) . . . . ?
C90 C85 P3 C97 -14.3(3) . . . . ?
C90 C85 P3 Ru2 -138.7(2) . . . . ?
C91 C92 C93 C94 -0.1(4) . . . . ?
C91 P3 Ru2 C61 143.26(13) . . . . ?
C91 P3 Ru2 C77 -80.10(13) . . . . ?
C91 P3 Ru2 C77A -119.4(13) . . . . ?
C91 P3 Ru2 O5 172.98(11) . . . . ?
C91 P3 Ru2 O6 113.80(11) . . . . ?
C91 P3 Ru2 O6A 140.7(11) . . . . ?
C91 P3 Ru2 O7 20.60(12) . . . . ?
C91 P3 Ru2 O7A 46.4(7) . . . . ?
C91 P3 Ru2 O8A -8.6(9) . . . . ?
C92 C91 C96 C95 1.3(4) . . . . ?
C92 C91 P3 C85 -6.8(3) . . . . ?
C92 C91 P3 C97 102.1(2) . . . . ?
C92 C91 P3 Ru2 -134.5(2) . . . . ?
C92 C93 C94 C95 0.6(4) . . . . ?
C93 C94 C95 C96 -0.2(4) . . . . ?
C94 C95 C96 C91 -0.8(4) . . . . ?
C96 C91 C92 C93 -0.9(4) . . . . ?
C96 C91 P3 C85 173.1(2) . . . . ?
C96 C91 P3 C97 -78.0(2) . . . . ?
C96 C91 P3 Ru2 45.3(2) . . . . ?
C97 C98 C99 C100 1.0(5) . . . . ?
C97 P3 Ru2 C61 -97.40(13) . . . . ?
C97 P3 Ru2 C77 39.25(13) . . . . ?
C97 P3 Ru2 C77A 0.0(13) . . . . ?
C97 P3 Ru2 O5 -67.68(11) . . . . ?
C97 P3 Ru2 O6 -126.85(11) . . . . ?
C97 P3 Ru2 O6A -100.0(11) . . . . ?
C97 P3 Ru2 O7 139.94(12) . . . . ?
C97 P3 Ru2 O7A 165.7(7) . . . . ?
C97 P3 Ru2 O8A 110.7(9) . . . . ?
C98 C97 C102 C101 0.4(4) . . . . ?
C98 C97 P3 C85 113.9(2) . . . . ?
C98 C97 P3 C91 6.3(3) . . . . ?
C98 C97 P3 Ru2 -118.7(2) . . . . ?
C98 C99 C100 C101 0.9(5) . . . . ?
C99 C100 C101 C102 -2.1(5) . . . . ?
C100 C101 C102 C97 1.5(5) . . . . ?
C102 C97 C98 C99 -1.6(4) . . . . ?
C102 C97 P3 C85 -67.9(2) . . . . ?
C102 C97 P3 C91 -175.5(2) . . . . ?
C102 C97 P3 Ru2 59.5(2) . . . . ?
C103 C104 C105 C106 -0.5(4) . . . . ?
C103 P4 Ru2 C61 16.28(13) . . . . ?
C103 P4 Ru2 C77 -120.39(13) . . . . ?
C103 P4 Ru2 C77A -81.1(13) . . . . ?
C103 P4 Ru2 O5 -13.67(11) . . . . ?
C103 P4 Ru2 O6 45.85(11) . . . . ?
C103 P4 Ru2 O6A 18.8(11) . . . . ?
C103 P4 Ru2 O7 138.94(11) . . . . ?
C103 P4 Ru2 O7A 113.4(7) . . . . ?
C103 P4 Ru2 O8A 167.9(9) . . . . ?
C104 C103 C108 C107 -0.6(4) . . . . ?
C104 C103 P4 C109 -75.5(2) . . . . ?
C104 C103 P4 C115 176.4(2) . . . . ?
C104 C103 P4 Ru2 52.5(2) . . . . ?
C104 C105 C106 C107 0.0(4) . . . . ?
C105 C106 C107 C108 0.3(4) . . . . ?
C106 C107 C108 C103 0.0(4) . . . . ?
C108 C103 C104 C105 0.8(4) . . . . ?
C108 C103 P4 C109 103.6(2) . . . . ?
C108 C103 P4 C115 -4.5(3) . . . . ?
C108 C103 P4 Ru2 -128.4(2) . . . . ?
C109 C110 C111 C112 0.2(5) . . . . ?
C109 P4 Ru2 C61 135.77(13) . . . . ?
C109 P4 Ru2 C77 -0.89(13) . . . . ?
C109 P4 Ru2 C77A 38.4(13) . . . . ?
C109 P4 Ru2 O5 105.82(11) . . . . ?
C109 P4 Ru2 O6 165.34(11) . . . . ?
C109 P4 Ru2 O6A 138.3(11) . . . . ?
C109 P4 Ru2 O7 -101.57(12) . . . . ?
C109 P4 Ru2 O7A -127.2(7) . . . . ?
C109 P4 Ru2 O8A -72.6(9) . . . . ?
C110 C109 C114 C113 -0.8(4) . . . . ?
C110 C109 P4 C103 -178.6(2) . . . . ?
C110 C109 P4 C115 -71.7(2) . . . . ?
C110 C109 P4 Ru2 56.4(2) . . . . ?
C110 C111 C112 C113 -0.9(5) . . . . ?
C111 C112 C113 C114 0.7(4) . . . . ?
C112 C113 C114 C109 0.2(4) . . . . ?
C114 C109 C110 C111 0.6(4) . . . . ?
C114 C109 P4 C103 2.2(3) . . . . ?
C114 C109 P4 C115 109.1(2) . . . . ?
C114 C109 P4 Ru2 -122.8(2) . . . . ?
C115 C120 C119 C118 0.4(4) . . . . ?
C115 C116 C117 C118 0.5(4) . . . . ?
C115 P4 Ru2 C61 -101.00(12) . . . . ?
C115 P4 Ru2 C77 122.34(13) . . . . ?
C115 P4 Ru2 C77A 161.6(13) . . . . ?
C115 P4 Ru2 O5 -130.95(11) . . . . ?
C115 P4 Ru2 O6 -71.43(11) . . . . ?
C115 P4 Ru2 O6A -98.5(11) . . . . ?
C115 P4 Ru2 O7 21.66(11) . . . . ?
C115 P4 Ru2 O7A -3.9(7) . . . . ?
C115 P4 Ru2 O8A 50.6(9) . . . . ?
C116 C115 P4 C103 -83.1(2) . . . . ?
C116 C115 P4 C109 170.2(2) . . . . ?
C116 C115 P4 Ru2 40.0(2) . . . . ?
C116 C117 C118 C119 0.5(4) . . . . ?
C117 C118 C119 C120 -1.0(4) . . . . ?
C119 C120 C115 C116 0.6(4) . . . . ?
C119 C120 C115 P4 -174.2(2) . . . . ?
O5 C61 C62 C63 -12.7(5) . . . . ?
O5 C61 C62 C67 166.4(3) . . . . ?
O5 C61 O6 Ru2 -0.7(3) . . . . ?
O5 C61 Ru2 C77 -8.2(3) . . . . ?
O5 C61 Ru2 C77A -15.3(13) . . . . ?
O5 C61 Ru2 O6 179.3(3) . . . . ?
O5 C61 Ru2 O6A 131(20) . . . . ?
O5 C61 Ru2 O7 169.80(15) . . . . ?
O5 C61 Ru2 O7A 160.8(7) . . . . ?
O5 C61 Ru2 O8A -178.5(18) . . . . ?
O5 C61 Ru2 P3 79.32(17) . . . . ?
O5 C61 Ru2 P4 -98.04(17) . . . . ?
O5A C61A C62A C67A 160(4) . . . . ?
O5A C61A C62A C63A -17(6) . . . . ?
O5A C61A O6A Ru2 1(7) . . . . ?
O6 C61 C62 C63 168.4(3) . . . . ?
O6 C61 C62 C67 -12.5(5) . . . . ?
O6 C61 O5 Ru2 0.7(3) . . . . ?
O6 C61 Ru2 C77 172.54(17) . . . . ?
O6 C61 Ru2 C77A 165.5(13) . . . . ?
O6 C61 Ru2 O5 -179.3(3) . . . . ?
O6 C61 Ru2 O6A -48(19) . . . . ?
O6 C61 Ru2 O7 -9.5(2) . . . . ?
O6 C61 Ru2 O7A -18.5(7) . . . . ?
O6 C61 Ru2 O8A 2.2(18) . . . . ?
O6 C61 Ru2 P3 -99.94(16) . . . . ?
O6 C61 Ru2 P4 82.70(16) . . . . ?
O6A C61A C62A C67A -13(6) . . . . ?
O6A C61A C62A C63A 170(4) . . . . ?
O7 C69 C70 C71 -11.9(4) . . . . ?
O7 C69 C70 C75 171.8(3) . . . . ?
O7A C69A C70A C71A -18(7) . . . . ?
O7A C69A C70A C75A 165(4) . . . . ?
O7A C69A O8A Ru2 4(4) . . . . ?
O8 C69 C70 C71 165.2(3) . . . . ?
O8 C69 C70 C75 -11.1(5) . . . . ?
O8 C69 O7 Ru2 -5.4(4) . . . . ?
O8A C69A C70A C71A 162(4) . . . . ?
O8A C69A C70A C75A -15(5) . . . . ?
O8A C69A O7A Ru2 -3(4) . . . . ?
P3 C85 C86 C87 174.0(2) . . . . ?
P3 C85 C90 C89 -174.3(2) . . . . ?
P3 C91 C92 C93 179.0(2) . . . . ?
P3 C91 C96 C95 -178.6(2) . . . . ?
P3 C97 C98 C99 176.6(2) . . . . ?
P3 C97 C102 C101 -177.8(2) . . . . ?
P4 C103 C104 C105 180.0(2) . . . . ?
P4 C103 C108 C107 -179.7(2) . . . . ?
P4 C109 C110 C111 -178.6(2) . . . . ?
P4 C109 C114 C113 178.4(2) . . . . ?
P4 C115 C116 C117 173.9(2) . . . . ?

loop_
_exptl_crystal_face_index_h
_exptl_crystal_face_index_k
_exptl_crystal_face_index_l
_exptl_crystal_face_perp_dist
_exptl_oxdiff_crystal_face_indexfrac_h
_exptl_oxdiff_crystal_face_indexfrac_k
_exptl_oxdiff_crystal_face_indexfrac_l
_exptl_oxdiff_crystal_face_x
_exptl_oxdiff_crystal_face_y
_exptl_oxdiff_crystal_face_z
1 0 -1 0.0911 1.0000 0.0000 -1.0000 -0.0390 0.0083 -0.0082
-4 30 -11 0.0660 -3.9990 30.0084 -11.0026 -0.2136 -0.9026 -0.4241
3 -34 -1 0.0443 2.9984 -34.0082 -1.0005 0.1303 1.0209 -0.0126
-3 34 1 0.0443 -2.9984 34.0082 1.0005 -0.1303 -1.0209 0.0126
-25 -10 22 0.0855 -25.0078 -10.0027 22.0041 1.0067 0.0876 0.0873
11 -28 4 0.0618 11.0011 -28.0078 4.0013 -0.0726 0.9021 0.3700
-18 -22 -2 0.0541 -18.0067 -22.0038 -2.0017 0.6185 0.5101 -0.5628
7 -32 -8 0.0480 6.9996 -32.0073 -8.0021 -0.0732 0.9977 -0.1432
-20 24 5 0.0327 -20.0039 24.0066 5.0005 0.4500 -0.8596 -0.3029
-7 -30 10 0.0677 -7.0042 -30.0076 10.0018 0.5053 0.8197 0.1096
1 2 -29 0.1388 1.0004 2.0031 -29.0073 -0.3723 -0.0303 -0.9490
15 20 11 0.1016 15.0058 20.0027 11.0039 -0.4197 -0.4806 0.7865
11 30 -9 0.0591 11.0053 30.0072 -9.0013 -0.6042 -0.7900 0.0263
-23 16 2 0.0346 -23.0054 16.0052 1.9995 0.5512 -0.6456 -0.4937
1 0 0 0.0968 1.0000 0.0000 0.0000 -0.0276 0.0076 0.0255

#end
data_Compound6h
_audit_creation_date              2011-10-17
_audit_creation_method
;
  Olex2 1.1
  (compiled 2011.09.07 svn.r1971, GUI svn.r3853)
;
_publ_contact_author_address      ?
_publ_contact_author_email        ?
_publ_contact_author_name         ''
_publ_contact_author_phone        ?
_chemical_name_common             ?
_chemical_name_systematic
;
 ? 
;
_chemical_formula_moiety          'C58 H44 F2 O4 P2 Ru'
_chemical_formula_sum             'C58 H44 F2 O4 P2 Ru'
_chemical_formula_weight          1005.94
_chemical_absolute_configuration  ad
_chemical_melting_point           ?
_chemical_oxdiff_formula          C58H55Ru1O6P2
_chemical_oxdiff_usercomment      ojsp40
loop_
  _atom_type_symbol
  _atom_type_description
  _atom_type_scat_dispersion_real
  _atom_type_scat_dispersion_imag
  _atom_type_scat_source
 'C' 'C' 0.0033 0.0016 'International Tables Vol C Tables 4.2.6.8 and 6.1.1.4'
 'H' 'H' 0.0000 0.0000 'International Tables Vol C Tables 4.2.6.8 and 6.1.1.4'
 'F' 'F' 0.0171 0.0103 'International Tables Vol C Tables 4.2.6.8 and 6.1.1.4'
 'O' 'O' 0.0106 0.0060 'International Tables Vol C Tables 4.2.6.8 and 6.1.1.4'
 'P' 'P' 0.1023 0.0942 'International Tables Vol C Tables 4.2.6.8 and 6.1.1.4'
 'Ru' 'Ru' -1.2594 0.8363
 'International Tables Vol C Tables 4.2.6.8 and 6.1.1.4'

_space_group_crystal_system       'orthorhombic'
_space_group_IT_number            29
_space_group_name_H-M_alt         'P c a 21'
_space_group_name_Hall            'P 2c -2ac'
loop_
  _space_group_symop_id
  _space_group_symop_operation_xyz
 1 'x, y, z'
 2 '-x, -y, z+1/2'
 3 '-x+1/2, y, z+1/2'
 4 'x+1/2, -y, z'

_cell_length_a                    18.4523(6)
_cell_length_b                    16.6112(7)
_cell_length_c                    15.3290(6)
_cell_angle_alpha                 90.00
_cell_angle_beta                  90.00
_cell_angle_gamma                 90.00
_cell_volume                      4698.6(3)
_cell_formula_units_Z             4
_cell_measurement_reflns_used     4239
_cell_measurement_temperature     109.9(4)
_cell_measurement_theta_max       28.9950
_cell_measurement_theta_min       2.8480
_exptl_absorpt_coefficient_mu     0.459
_exptl_absorpt_correction_T_max   0.955
_exptl_absorpt_correction_T_min   0.923
_exptl_absorpt_correction_type    analytical
_exptl_absorpt_process_details
;
CrysAlisPro, Agilent Technologies,
Version 1.171.35.15 (release 03-08-2011 CrysAlis171 .NET)
(compiled Aug  3 2011,13:03:54)
Analytical numeric absorption correction using a multifaceted crystal
			model based on expressions derived by R.C. Clark & J.S. Reid.
(Clark, R. C. & Reid, J. S. (1995). Acta Cryst. A51, 887-897)
;
_exptl_crystal_colour             'clear dark orange'
_exptl_crystal_colour_lustre      clear
_exptl_crystal_colour_modifier    dark
_exptl_crystal_colour_primary     orange
_exptl_crystal_density_diffrn     1.422
_exptl_crystal_density_meas       ?
_exptl_crystal_density_method     'not measured'
_exptl_crystal_description        block
_exptl_crystal_F_000              2064
_exptl_crystal_size_max           0.2435
_exptl_crystal_size_mid           0.1378
_exptl_crystal_size_min           0.1072
_exptl_special_details
;
 ? 
;
_diffrn_reflns_av_R_equivalents   0.0499
_diffrn_reflns_av_unetI/netI      0.0841
_diffrn_reflns_limit_h_max        13
_diffrn_reflns_limit_h_min        -23
_diffrn_reflns_limit_k_max        15
_diffrn_reflns_limit_k_min        -20
_diffrn_reflns_limit_l_max        14
_diffrn_reflns_limit_l_min        -20
_diffrn_reflns_number             12573
_diffrn_reflns_theta_full         26.32
_diffrn_reflns_theta_max          29.06
_diffrn_reflns_theta_min          2.85
_diffrn_ambient_temperature       109.9(4)
_diffrn_detector_area_resol_mean  16.1450
_diffrn_measured_fraction_theta_full 0.9927
_diffrn_measured_fraction_theta_max 0.858
_diffrn_measurement_details
;
#__ type_ start__ end____ width___ exp.time_
  1 omega  -85.00  -51.00   1.0000   15.0000
omega____ theta____ kappa____ phi______ frames
    -      -17.6138  -57.0000 -180.0000 34

#__ type_ start__ end____ width___ exp.time_
  2 omega   -7.00   66.00   1.0000   15.0000
omega____ theta____ kappa____ phi______ frames
    -       19.0201 -112.0000   57.0000 73

#__ type_ start__ end____ width___ exp.time_
  3 omega   35.00   62.00   1.0000   15.0000
omega____ theta____ kappa____ phi______ frames
    -       19.0201  178.0000 -180.0000 27
;
_diffrn_measurement_device_type   'SuperNova, Single source at offset), Eos'
_diffrn_measurement_method        '\w scans'
_diffrn_orient_matrix_UB_11       -0.0090098000
_diffrn_orient_matrix_UB_12       -0.0410851000
_diffrn_orient_matrix_UB_13       -0.0065172000
_diffrn_orient_matrix_UB_21       -0.0366520000
_diffrn_orient_matrix_UB_22       0.0085030000
_diffrn_orient_matrix_UB_23       0.0103889000
_diffrn_orient_matrix_UB_31       -0.0072115000
_diffrn_orient_matrix_UB_32       0.0080928000
_diffrn_orient_matrix_UB_33       -0.0446081000
_diffrn_radiation_monochromator   mirror
_diffrn_radiation_type            'Mo K\a'
_diffrn_radiation_wavelength      0.7107
_diffrn_source                    'SuperNova (Mo) X-ray Source'
_diffrn_standards_decay_%         ?
_diffrn_standards_interval_count  ?
_diffrn_standards_interval_time   ?
_diffrn_standards_number          ?
_reflns_number_gt                 5943
_reflns_number_total              7223
_reflns_odcompleteness_completeness 99.27
_reflns_odcompleteness_iscentric  1
_reflns_odcompleteness_theta      26.32
_reflns_threshold_expression      >2sigma(I)
_computing_cell_refinement
;
CrysAlisPro, Agilent Technologies,
Version 1.171.35.15 (release 03-08-2011 CrysAlis171 .NET)
(compiled Aug  3 2011,13:03:54)
;
_computing_data_collection
;
CrysAlisPro, Agilent Technologies,
Version 1.171.35.15 (release 03-08-2011 CrysAlis171 .NET)
(compiled Aug  3 2011,13:03:54)
;
_computing_data_reduction
;
CrysAlisPro, Agilent Technologies,
Version 1.171.35.15 (release 03-08-2011 CrysAlis171 .NET)
(compiled Aug  3 2011,13:03:54)
;
_computing_molecular_graphics
;
O. V. Dolomanov, L. J. Bourhis, R. J. Gildea, J. A. K. Howard and H. Puschmann,
OLEX2: a complete structure solution, refinement and analysis program.
J. Appl. Cryst. (2009). 42, 339-341.
;
_computing_publication_material
;
O. V. Dolomanov, L. J. Bourhis, R. J. Gildea, J. A. K. Howard and H. Puschmann,
OLEX2: a complete structure solution, refinement and analysis program.
J. Appl. Cryst. (2009). 42, 339-341.
;
_computing_structure_refinement
;
XL, G.M. Sheldrick, Acta Cryst.
(2008). A64, 112-122
;
_computing_structure_solution
;
XS, G.M. Sheldrick, Acta Cryst.
(2008). A64, 112-122
;
_refine_diff_density_max          0.711
_refine_diff_density_min          -0.881
_refine_diff_density_rms          0.088
_refine_ls_abs_structure_details  'Flack H D (1983), Acta Cryst. A39, 876-881'
_refine_ls_abs_structure_Flack    -0.04(4)
_refine_ls_extinction_coef        ?
_refine_ls_extinction_method      none
_refine_ls_goodness_of_fit_ref    1.063
_refine_ls_hydrogen_treatment     constr
_refine_ls_matrix_type            full
_refine_ls_number_parameters      657
_refine_ls_number_reflns          7223
_refine_ls_number_restraints      111
_refine_ls_R_factor_all           0.0695
_refine_ls_R_factor_gt            0.0534
_refine_ls_restrained_S_all       1.060
_refine_ls_shift/su_max           0.001
_refine_ls_shift/su_mean          0.000
_refine_ls_structure_factor_coef  Fsqd
_refine_ls_weighting_details
'calc w=1/[\s^2^(Fo^2^)+(0.0424P)^2^+0.4745P] where P=(Fo^2^+2Fc^2^)/3'
_refine_ls_weighting_scheme       calc
_refine_ls_wR_factor_gt           0.1106
_refine_ls_wR_factor_ref          0.1250
_refine_special_details
;
 Refinement of F^2^ against ALL reflections.  The weighted R-factor wR and 
 goodness of fit S are based on F^2^, conventional R-factors R are based 
 on F, with F set to zero for negative F^2^. The threshold expression of 
 F^2^ > 2sigma(F^2^) is used only for calculating R-factors(gt) etc. and is 
 not relevant to the choice of reflections for refinement.  R-factors based 
 on F^2^ are statistically about twice as large as those based on F, and R- 
 factors based on ALL data will be even larger. 

 The monodentate 3-fluorobenzoate and phenylvinylidine ligands were
 disordered by exchange of position and were each modelled in two positions
 with a refined occupancy of 0.795:0.205(8).  The minor form was modelled 
 isotropically and the phenyl rings of the minor form were constrained to
 be a regular hexagon with a C-C distance of 1.39 angstroms.
;
_atom_sites_solution_hydrogens    geom
_atom_sites_solution_primary      direct
_atom_sites_solution_secondary    difmap
loop_
  _atom_site_label
  _atom_site_type_symbol
  _atom_site_fract_x
  _atom_site_fract_y
  _atom_site_fract_z
  _atom_site_U_iso_or_equiv
  _atom_site_adp_type
  _atom_site_occupancy
  _atom_site_symmetry_multiplicity
  _atom_site_calc_flag
  _atom_site_refinement_flags
  _atom_site_disorder_assembly
  _atom_site_disorder_group
 C1 C 0.5008(3) 0.2507(4) 0.8419(6) 0.0329(17) Uani 1 1 d . B .
 C2 C 0.5015(3) 0.2567(3) 0.9410(4) 0.0277(15) Uani 1 1 d . B .
 C3 C 0.4516(4) 0.3020(4) 0.9883(5) 0.0398(17) Uani 1 1 d . . .
 H3 H 0.4146 0.3312 0.9592 0.048 Uiso 1 1 calc R A 1
 C4 C 0.4566(4) 0.3038(5) 1.0764(5) 0.049(2) Uani 0.803(9) 1 d P B 1
 C4A C 0.4566(4) 0.3038(5) 1.0764(5) 0.049(2) Uani 0.197(9) 1 d P B 2
 H4A H 0.4224 0.3350 1.1080 0.059 Uiso 0.197(9) 1 calc PR B 2
 C5 C 0.5087(4) 0.2627(4) 1.1224(5) 0.0448(19) Uani 1 1 d . . .
 H5 H 0.5118 0.2660 1.1841 0.054 Uiso 1 1 calc R B 1
 C6 C 0.5552(4) 0.2173(5) 1.0753(5) 0.0457(19) Uani 0.803(9) 1 d P B 1
 H6 H 0.5907 0.1865 1.1053 0.055 Uiso 0.803(9) 1 calc PR B 1
 C6A C 0.5552(4) 0.2173(5) 1.0753(5) 0.0457(19) Uani 0.197(9) 1 d P B 2
 C7 C 0.5531(4) 0.2138(4) 0.9858(5) 0.0385(16) Uani 1 1 d . . .
 H7 H 0.5873 0.1818 0.9550 0.046 Uiso 1 1 calc R B 1
 C8 C 0.6194(8) 0.2207(7) 0.5722(9) 0.043(3) Uani 0.741(6) 1 d PU C 1
 C8A C 0.3716(18) 0.260(2) 0.577(3) 0.028(9) Uiso 0.259(6) 1 d P C 2
 C9 C 0.6592(7) 0.2061(13) 0.4844(8) 0.0276(18) Uani 0.741(6) 1 d PU C 1
 C9A C 0.3317(17) 0.267(3) 0.4851(18) 0.0302(17) Uani 0.259(6) 1 d PG C 2
 C10A C 0.2568(16) 0.2739(19) 0.4776(15) 0.037(11) Uiso 0.259(6) 1 d PG C 2
 H10A H 0.2270 0.2680 0.5278 0.045 Uiso 0.259(6) 1 calc PR C 2
 C11A C 0.2255(11) 0.2890(18) 0.3968(18) 0.038(9) Uiso 0.259(6) 1 d PG C 2
 H11A H 0.1744 0.2934 0.3916 0.046 Uiso 0.259(6) 1 calc PR C 2
 C12A C 0.2691(14) 0.2976(19) 0.3234(14) 0.050(13) Uiso 0.259(6) 1 d PG C 2
 H12A H 0.2477 0.3079 0.2681 0.060 Uiso 0.259(6) 1 calc PR C 2
 C13A C 0.3440(14) 0.2911(17) 0.3309(18) 0.035(8) Uiso 0.259(6) 1 d PG C 2
 C14A C 0.3752(11) 0.276(2) 0.412(2) 0.044(14) Uiso 0.259(6) 1 d PG C 2
 H14A H 0.4264 0.2716 0.4168 0.053 Uiso 0.259(6) 1 calc PR C 2
 C10 C 0.6220(6) 0.1821(8) 0.4111(8) 0.040(3) Uani 0.741(6) 1 d PU C 1
 H10 H 0.5721 0.1681 0.4141 0.048 Uiso 0.741(6) 1 calc PR C 1
 C11 C 0.6584(8) 0.1791(8) 0.3341(9) 0.058(3) Uani 0.741(6) 1 d PU C 1
 C12 C 0.7268(7) 0.2020(8) 0.3225(9) 0.056(4) Uani 0.741(6) 1 d PU C 1
 H12 H 0.7480 0.2022 0.2660 0.068 Uiso 0.741(6) 1 calc PR C 1
 C13 C 0.7674(6) 0.2263(10) 0.3967(11) 0.060(5) Uani 0.741(6) 1 d PU C 1
 H13 H 0.8172 0.2400 0.3916 0.072 Uiso 0.741(6) 1 calc PR C 1
 C14 C 0.7317(7) 0.2296(12) 0.4790(10) 0.052(4) Uani 0.741(6) 1 d PU C 1
 H14 H 0.7569 0.2475 0.5295 0.062 Uiso 0.741(6) 1 calc PR C 1
 C15 C 0.4094(5) 0.2520(5) 0.6192(6) 0.0255(19) Uani 0.741(6) 1 d PDU C 1
 C15A C 0.5887(16) 0.2257(19) 0.622(2) 0.042(7) Uiso 0.259(6) 1 d PD C 2
 C16 C 0.3451(6) 0.2621(6) 0.5807(9) 0.032(3) Uani 0.741(6) 1 d PDU C 1
 H16 H 0.3040 0.2623 0.6180 0.039 Uiso 0.741(6) 1 calc PR C 1
 C16A C 0.6418(15) 0.208(2) 0.568(3) 0.034(10) Uiso 0.259(6) 1 d PD C 2
 H16A H 0.6801 0.1829 0.5994 0.041 Uiso 0.259(6) 1 calc PR C 2
 C17 C 0.3305(7) 0.2728(10) 0.4870(8) 0.0302(17) Uani 0.741(6) 1 d PU C 1
 C17A C 0.6600(14) 0.213(4) 0.4833(17) 0.0276(18) Uani 0.259(6) 1 d PG C 2
 C18A C 0.7324(13) 0.221(3) 0.4601(18) 0.031(5) Uiso 0.259(6) 1 d PGD C 2
 H18A H 0.7675 0.2340 0.5033 0.037 Uiso 0.259(6) 1 calc PR C 2
 C19A C 0.7535(11) 0.211(2) 0.3738(18) 0.031(5) Uiso 0.259(6) 1 d PG C 2
 H19A H 0.8030 0.2164 0.3580 0.037 Uiso 0.259(6) 1 calc PR C 2
 C20A C 0.7022(12) 0.1919(19) 0.3107(15) 0.031(5) Uiso 0.259(6) 1 d PG C 2
 H20A H 0.7166 0.1847 0.2517 0.037 Uiso 0.259(6) 1 calc PR C 2
 C21A C 0.6297(11) 0.1835(18) 0.3339(17) 0.031(5) Uiso 0.259(6) 1 d PG C 2
 H21A H 0.5946 0.1707 0.2907 0.037 Uiso 0.259(6) 1 calc PR C 2
 C22A C 0.6086(11) 0.194(3) 0.4202(18) 0.031(5) Uiso 0.259(6) 1 d PGD C 2
 H22A H 0.5591 0.1883 0.4360 0.037 Uiso 0.259(6) 1 calc PR C 2
 C18 C 0.3806(7) 0.2571(10) 0.4258(10) 0.049(4) Uani 0.741(6) 1 d PU C 1
 H18 H 0.4271 0.2392 0.4440 0.059 Uiso 0.741(6) 1 calc PR C 1
 C19 C 0.3673(8) 0.2658(8) 0.3361(8) 0.059(3) Uani 0.741(6) 1 d PU C 1
 H19 H 0.4039 0.2545 0.2943 0.071 Uiso 0.741(6) 1 calc PR C 1
 C20 C 0.2996(9) 0.2914(8) 0.3107(8) 0.061(3) Uani 0.741(6) 1 d PU C 1
 H20 H 0.2896 0.2992 0.2505 0.073 Uiso 0.741(6) 1 calc PR C 1
 C21 C 0.2465(7) 0.3057(9) 0.3710(9) 0.056(3) Uani 0.741(6) 1 d PU C 1
 H21 H 0.1994 0.3217 0.3528 0.067 Uiso 0.741(6) 1 calc PR C 1
 C22 C 0.2621(7) 0.2967(8) 0.4596(9) 0.046(3) Uani 0.741(6) 1 d PU C 1
 H22 H 0.2254 0.3071 0.5017 0.055 Uiso 0.741(6) 1 calc PR C 1
 C23 C 0.5708(4) 0.4139(4) 0.5699(5) 0.0367(19) Uani 1 1 d . . .
 C24 C 0.5577(4) 0.3798(4) 0.4888(5) 0.0455(19) Uani 1 1 d . . .
 H24 H 0.5226 0.3382 0.4830 0.055 Uiso 1 1 calc R . .
 C25 C 0.5959(4) 0.4063(5) 0.4161(6) 0.058(2) Uani 1 1 d . . .
 H25 H 0.5861 0.3826 0.3609 0.070 Uiso 1 1 calc R . .
 C26 C 0.6457(5) 0.4639(7) 0.4217(7) 0.079(4) Uani 1 1 d . . .
 H26 H 0.6711 0.4801 0.3707 0.094 Uiso 1 1 calc R . .
 C27 C 0.6613(4) 0.5008(6) 0.5007(7) 0.070(3) Uani 1 1 d . . .
 H27 H 0.6956 0.5433 0.5040 0.084 Uiso 1 1 calc R . .
 C28 C 0.6247(3) 0.4732(5) 0.5762(6) 0.049(2) Uani 1 1 d . . .
 H28 H 0.6368 0.4950 0.6317 0.059 Uiso 1 1 calc R . .
 C29 C 0.4372(3) 0.4454(3) 0.6580(5) 0.0308(16) Uani 1 1 d . . .
 C30 C 0.4360(4) 0.5151(4) 0.6057(6) 0.056(2) Uani 1 1 d . . .
 H30 H 0.4769 0.5283 0.5709 0.067 Uiso 1 1 calc R . .
 C31 C 0.3749(4) 0.5650(4) 0.6047(6) 0.056(2) Uani 1 1 d . . .
 H31 H 0.3754 0.6135 0.5719 0.067 Uiso 1 1 calc R . .
 C32 C 0.3142(3) 0.5437(4) 0.6513(5) 0.045(2) Uani 1 1 d . . .
 H32 H 0.2729 0.5778 0.6509 0.054 Uiso 1 1 calc R . .
 C33 C 0.3131(3) 0.4731(4) 0.6988(5) 0.0419(18) Uani 1 1 d . . .
 H33 H 0.2705 0.4578 0.7294 0.050 Uiso 1 1 calc R . .
 C34 C 0.3744(3) 0.4244(4) 0.7016(5) 0.0359(17) Uani 1 1 d . . .
 H34 H 0.3731 0.3758 0.7342 0.043 Uiso 1 1 calc R . .
 C35 C 0.5686(3) 0.4201(4) 0.7570(5) 0.0314(17) Uani 1 1 d . . .
 C36 C 0.5437(4) 0.4864(5) 0.8036(6) 0.063(3) Uani 1 1 d . . .
 H36 H 0.4979 0.5097 0.7907 0.075 Uiso 1 1 calc R . .
 C37 C 0.5870(4) 0.5179(5) 0.8695(6) 0.071(3) Uani 1 1 d . . .
 H37 H 0.5715 0.5639 0.9012 0.085 Uiso 1 1 calc R . .
 C38 C 0.6529(5) 0.4821(5) 0.8889(6) 0.061(3) Uani 1 1 d . . .
 H38 H 0.6818 0.5028 0.9350 0.073 Uiso 1 1 calc R . .
 C39 C 0.6762(3) 0.4180(4) 0.8426(5) 0.0439(19) Uani 1 1 d . . .
 H39 H 0.7215 0.3940 0.8564 0.053 Uiso 1 1 calc R . .
 C40 C 0.6345(3) 0.3864(4) 0.7748(5) 0.0357(16) Uani 1 1 d . . .
 H40 H 0.6517 0.3422 0.7414 0.043 Uiso 1 1 calc R . .
 C41 C 0.4106(3) 0.0545(4) 0.6135(4) 0.0243(13) Uani 1 1 d . . .
 C42 C 0.4220(3) 0.0761(4) 0.5259(4) 0.0300(16) Uani 1 1 d . . .
 H42 H 0.4582 0.1143 0.5108 0.036 Uiso 1 1 calc R . .
 C43 C 0.3794(3) 0.0405(4) 0.4614(5) 0.0392(17) Uani 1 1 d . . .
 H43 H 0.3858 0.0556 0.4021 0.047 Uiso 1 1 calc R . .
 C44 C 0.3278(3) -0.0169(4) 0.4834(5) 0.0397(18) Uani 1 1 d . . .
 H44 H 0.2994 -0.0414 0.4390 0.048 Uiso 1 1 calc R . .
 C45 C 0.3176(3) -0.0384(4) 0.5696(5) 0.0400(17) Uani 1 1 d . . .
 H45 H 0.2821 -0.0774 0.5843 0.048 Uiso 1 1 calc R . .
 C46 C 0.3591(3) -0.0031(3) 0.6347(5) 0.0315(14) Uani 1 1 d . . .
 H46 H 0.3523 -0.0185 0.6938 0.038 Uiso 1 1 calc R . .
 C47 C 0.4227(3) 0.0800(4) 0.7971(4) 0.0219(14) Uani 1 1 d . . .
 C48 C 0.3538(3) 0.1163(4) 0.8102(4) 0.0300(15) Uani 1 1 d . . .
 H48 H 0.3330 0.1495 0.7664 0.036 Uiso 1 1 calc R . .
 C49 C 0.3175(3) 0.1025(4) 0.8874(4) 0.0396(17) Uani 1 1 d . . .
 H49 H 0.2702 0.1240 0.8944 0.048 Uiso 1 1 calc R . .
 C50 C 0.3477(3) 0.0584(4) 0.9552(5) 0.0406(18) Uani 1 1 d . . .
 H50 H 0.3221 0.0507 1.0083 0.049 Uiso 1 1 calc R . .
 C51 C 0.4156(4) 0.0262(4) 0.9435(4) 0.0401(17) Uani 1 1 d . . .
 H51 H 0.4376 -0.0031 0.9896 0.048 Uiso 1 1 calc R . .
 C52 C 0.4529(3) 0.0360(4) 0.8645(4) 0.0306(15) Uani 1 1 d . . .
 H52 H 0.4993 0.0122 0.8572 0.037 Uiso 1 1 calc R . .
 C53 C 0.5484(2) 0.0353(3) 0.6988(4) 0.0207(12) Uani 1 1 d . . .
 C54 C 0.6152(3) 0.0644(3) 0.7289(4) 0.0281(14) Uani 1 1 d . . .
 H54 H 0.6196 0.1193 0.7453 0.034 Uiso 1 1 calc R . .
 C55 C 0.6750(3) 0.0137(4) 0.7351(4) 0.0318(15) Uani 1 1 d . . .
 H55 H 0.7196 0.0341 0.7567 0.038 Uiso 1 1 calc R . .
 C56 C 0.6698(3) -0.0659(4) 0.7102(4) 0.0325(16) Uani 1 1 d . . .
 H56 H 0.7110 -0.1000 0.7139 0.039 Uiso 1 1 calc R . .
 C57 C 0.6049(3) -0.0960(3) 0.6799(5) 0.0385(15) Uani 1 1 d . . .
 H57 H 0.6015 -0.1506 0.6619 0.046 Uiso 1 1 calc R . .
 C58 C 0.5446(3) -0.0461(3) 0.6757(5) 0.0328(13) Uani 1 1 d . . .
 H58 H 0.4996 -0.0677 0.6568 0.039 Uiso 1 1 calc R . .
 F1 F 0.4087(4) 0.3443(4) 1.1242(4) 0.100(3) Uani 0.803(9) 1 d P B 1
 F1A F 0.6049(12) 0.1935(16) 1.1216(13) 0.060(8) Uani 0.197(9) 1 d P B 2
 F2 F 0.6157(5) 0.1556(5) 0.2632(5) 0.100(3) Uani 0.741(6) 1 d PU C 1
 F2A F 0.3796(14) 0.3038(17) 0.2586(19) 0.111(9) Uiso 0.259(6) 1 d P C 2
 O1 O 0.5559(3) 0.2269(3) 0.8023(3) 0.0348(12) Uani 1 1 d . B .
 O2 O 0.4454(2) 0.2711(3) 0.8018(3) 0.0301(11) Uani 1 1 d . B .
 O3 O 0.5546(4) 0.2060(4) 0.5694(5) 0.047(2) Uani 0.741(6) 1 d PU C 1
 O3A O 0.4352(12) 0.2608(13) 0.5727(16) 0.041(6) Uiso 0.259(6) 1 d P C 2
 O4 O 0.6579(4) 0.2408(4) 0.6363(5) 0.057(2) Uani 0.741(6) 1 d PU C 1
 O4A O 0.3322(9) 0.2379(11) 0.6352(13) 0.042(5) Uiso 0.259(6) 1 d P C 2
 P1 P 0.51730(7) 0.38131(8) 0.66368(13) 0.0257(4) Uani 1 1 d . C .
 P2 P 0.46933(7) 0.10064(8) 0.69505(10) 0.0200(3) Uani 1 1 d . C .
 Ru1 Ru 0.494255(18) 0.24029(2) 0.67593(6) 0.02123(12) Uani 1 1 d . . .

loop_
  _atom_site_aniso_label
  _atom_site_aniso_U_11
  _atom_site_aniso_U_22
  _atom_site_aniso_U_33
  _atom_site_aniso_U_23
  _atom_site_aniso_U_13
  _atom_site_aniso_U_12
 C1 0.033(3) 0.019(3) 0.047(5) 0.000(3) -0.005(3) -0.010(3)
 C2 0.041(4) 0.023(3) 0.018(3) 0.003(3) -0.001(3) -0.011(3)
 C3 0.042(4) 0.041(4) 0.036(4) 0.007(3) 0.002(3) 0.004(3)
 C4 0.069(5) 0.047(5) 0.032(4) -0.006(4) 0.025(4) 0.008(4)
 C4A 0.069(5) 0.047(5) 0.032(4) -0.006(4) 0.025(4) 0.008(4)
 C5 0.059(5) 0.058(5) 0.017(4) 0.002(3) 0.004(3) -0.005(4)
 C6 0.044(4) 0.049(5) 0.044(5) 0.019(4) -0.016(4) -0.010(4)
 C6A 0.044(4) 0.049(5) 0.044(5) 0.019(4) -0.016(4) -0.010(4)
 C7 0.046(4) 0.037(4) 0.033(4) 0.000(3) 0.009(3) 0.002(3)
 C8 0.063(8) 0.023(6) 0.044(7) 0.001(5) 0.026(8) 0.009(6)
 C9 0.030(3) 0.021(5) 0.032(4) 0.005(3) 0.008(3) 0.002(3)
 C9A 0.035(3) 0.019(4) 0.036(4) -0.006(3) -0.013(3) 0.005(3)
 C10 0.050(6) 0.031(7) 0.038(6) -0.006(5) -0.005(5) 0.006(5)
 C11 0.092(10) 0.038(6) 0.046(7) -0.012(5) -0.012(8) 0.010(7)
 C12 0.049(6) 0.045(7) 0.075(9) 0.030(6) 0.046(7) 0.021(6)
 C13 0.024(6) 0.056(9) 0.100(12) 0.028(8) 0.025(6) 0.009(5)
 C14 0.047(6) 0.034(8) 0.075(10) 0.023(7) -0.028(7) 0.000(5)
 C15 0.031(4) 0.025(4) 0.021(4) 0.001(4) 0.010(4) 0.000(3)
 C16 0.022(5) 0.035(6) 0.041(7) 0.006(4) -0.012(5) -0.012(5)
 C17 0.035(3) 0.019(4) 0.036(4) -0.006(3) -0.013(3) 0.005(3)
 C17A 0.030(3) 0.021(5) 0.032(4) 0.005(3) 0.008(3) 0.002(3)
 C18 0.061(8) 0.042(7) 0.044(7) 0.013(6) -0.007(6) 0.008(5)
 C19 0.086(8) 0.045(7) 0.047(8) 0.003(6) -0.012(7) 0.006(7)
 C20 0.092(10) 0.051(7) 0.040(7) 0.010(6) -0.027(7) -0.009(7)
 C21 0.049(6) 0.072(9) 0.047(8) 0.016(7) -0.018(7) 0.001(7)
 C22 0.039(6) 0.035(7) 0.065(8) 0.006(6) -0.028(6) 0.006(5)
 C23 0.030(4) 0.027(4) 0.052(5) 0.020(4) 0.009(4) 0.010(3)
 C24 0.047(4) 0.037(4) 0.053(5) 0.018(4) 0.015(4) 0.007(3)
 C25 0.065(5) 0.070(6) 0.039(5) 0.028(5) 0.018(4) 0.036(5)
 C26 0.051(5) 0.099(9) 0.085(8) 0.064(8) 0.039(6) 0.044(6)
 C27 0.032(4) 0.075(7) 0.104(8) 0.059(7) 0.020(5) 0.001(4)
 C28 0.027(3) 0.055(5) 0.066(6) 0.028(4) 0.011(4) 0.000(3)
 C29 0.031(2) 0.016(3) 0.045(5) -0.001(3) 0.007(3) 0.000(2)
 C30 0.031(3) 0.043(4) 0.094(7) 0.018(5) 0.013(4) 0.011(3)
 C31 0.043(4) 0.029(4) 0.096(7) 0.006(4) 0.000(4) 0.014(3)
 C32 0.024(3) 0.044(4) 0.066(6) -0.015(4) -0.007(3) 0.012(3)
 C33 0.029(3) 0.046(4) 0.051(5) -0.012(4) 0.008(3) 0.003(3)
 C34 0.024(3) 0.036(3) 0.047(5) -0.001(3) 0.003(3) 0.006(2)
 C35 0.027(3) 0.017(3) 0.050(5) 0.002(3) 0.010(3) -0.005(3)
 C36 0.036(4) 0.042(5) 0.109(8) -0.036(5) -0.015(5) 0.007(3)
 C37 0.064(5) 0.054(5) 0.094(8) -0.049(6) -0.007(5) 0.009(4)
 C38 0.046(5) 0.052(6) 0.085(8) -0.024(5) -0.015(5) -0.014(4)
 C39 0.036(3) 0.030(4) 0.065(5) 0.003(4) -0.003(4) -0.009(3)
 C40 0.038(3) 0.028(4) 0.041(4) 0.005(3) 0.001(3) -0.011(3)
 C41 0.021(3) 0.028(3) 0.023(3) -0.011(3) -0.004(3) 0.008(2)
 C42 0.029(3) 0.036(4) 0.025(4) -0.011(3) -0.001(3) 0.007(3)
 C43 0.041(4) 0.046(4) 0.031(4) -0.013(3) 0.001(3) 0.013(3)
 C44 0.041(4) 0.036(4) 0.042(5) -0.023(3) -0.017(3) 0.015(3)
 C45 0.033(3) 0.040(4) 0.047(5) -0.016(4) -0.013(3) 0.002(3)
 C46 0.029(3) 0.031(3) 0.034(4) -0.005(3) -0.008(3) 0.002(2)
 C47 0.020(3) 0.024(3) 0.021(3) -0.003(3) 0.002(3) -0.004(2)
 C48 0.025(3) 0.034(4) 0.031(4) 0.005(3) 0.002(3) -0.006(3)
 C49 0.026(3) 0.056(5) 0.037(4) 0.001(4) 0.007(3) -0.001(3)
 C50 0.034(3) 0.062(5) 0.025(4) 0.001(4) 0.006(3) -0.014(4)
 C51 0.044(4) 0.054(5) 0.022(4) 0.008(3) -0.004(3) -0.003(3)
 C52 0.024(3) 0.039(4) 0.029(4) 0.003(3) -0.004(3) 0.000(3)
 C53 0.022(2) 0.020(3) 0.021(3) 0.007(2) 0.000(2) 0.0018(19)
 C54 0.028(3) 0.019(3) 0.037(4) -0.005(3) 0.000(3) 0.000(2)
 C55 0.025(3) 0.036(4) 0.035(4) 0.003(3) -0.001(3) 0.002(3)
 C56 0.025(3) 0.030(3) 0.042(4) 0.000(3) 0.000(3) 0.012(2)
 C57 0.044(3) 0.027(3) 0.044(4) -0.009(4) -0.014(4) 0.009(2)
 C58 0.032(2) 0.027(3) 0.040(4) -0.002(4) -0.012(4) -0.001(2)
 F1 0.143(7) 0.084(5) 0.073(5) 0.000(4) 0.053(5) 0.052(5)
 F1A 0.054(13) 0.10(2) 0.027(13) 0.006(13) -0.024(10) 0.031(13)
 F2 0.177(8) 0.082(6) 0.041(4) -0.023(4) -0.018(5) 0.028(6)
 O1 0.036(3) 0.037(3) 0.031(3) -0.006(2) 0.002(2) -0.008(2)
 O2 0.029(2) 0.030(3) 0.031(3) 0.005(2) 0.007(2) -0.0065(19)
 O3 0.053(4) 0.028(4) 0.060(5) 0.005(4) 0.042(4) 0.006(3)
 O4 0.077(5) 0.052(5) 0.041(5) 0.003(4) -0.013(4) 0.008(4)
 P1 0.0226(6) 0.0202(6) 0.0344(11) 0.0059(8) 0.0116(8) 0.0017(5)
 P2 0.0192(5) 0.0190(6) 0.0219(9) -0.0009(6) -0.0020(6) 0.0009(5)
 Ru1 0.02237(18) 0.0202(2) 0.0211(2) 0.0017(3) 0.0009(3) 0.00207(15)

_geom_special_details
;
 All esds (except the esd in the dihedral angle between two l.s. planes) 
 are estimated using the full covariance matrix.  The cell esds are taken 
 into account individually in the estimation of esds in distances, angles 
 and torsion angles; correlations between esds in cell parameters are only 
 used when they are defined by crystal symmetry.  An approximate (isotropic) 
 treatment of cell esds is used for estimating esds involving l.s. planes. 
;
loop_
  _geom_bond_atom_site_label_1
  _geom_bond_atom_site_label_2
  _geom_bond_distance
  _geom_bond_site_symmetry_2
  _geom_bond_publ_flag
 C1 C2 1.523(10) . ?
 C1 O1 1.249(8) . ?
 C1 O2 1.239(8) . ?
 C1 Ru1 2.552(8) . ?
 C2 C3 1.392(9) . ?
 C2 C7 1.374(9) . ?
 C3 H3 0.9500 . ?
 C3 C4 1.354(10) . ?
 C4 C5 1.374(10) . ?
 C4 F1 1.330(8) . ?
 C5 H5 0.9500 . ?
 C5 C6 1.351(10) . ?
 C6 H6 0.9500 . ?
 C6 C7 1.374(10) . ?
 C7 H7 0.9500 . ?
 C8 C9 1.551(18) . ?
 C8 O3 1.221(16) . ?
 C8 O4 1.257(16) . ?
 C8A C9A 1.59(5) . ?
 C8A O3A 1.18(4) . ?
 C8A O4A 1.21(4) . ?
 C9 C10 1.377(12) . ?
 C9 C14 1.397(13) . ?
 C9A C10A 1.3900 . ?
 C9A C14A 1.3900 . ?
 C10A H10A 0.9500 . ?
 C10A C11A 1.3900 . ?
 C11A H11A 0.9500 . ?
 C11A C12A 1.3900 . ?
 C12A H12A 0.9500 . ?
 C12A C13A 1.3900 . ?
 C13A C14A 1.3900 . ?
 C13A F2A 1.30(3) . ?
 C14A H14A 0.9500 . ?
 C10 H10 0.9500 . ?
 C10 C11 1.359(16) . ?
 C11 C12 1.332(15) . ?
 C11 F2 1.398(14) . ?
 C12 H12 0.9500 . ?
 C12 C13 1.420(18) . ?
 C13 H13 0.9500 . ?
 C13 C14 1.424(16) . ?
 C14 H14 0.9500 . ?
 C15 C16 1.337(13) . ?
 C15 Ru1 1.801(9) . ?
 C15A C16A 1.32(2) . ?
 C15A Ru1 1.95(3) . ?
 C16 H16 0.9500 . ?
 C16 C17 1.471(17) . ?
 C16A H16A 0.9500 . ?
 C16A C17A 1.34(5) . ?
 C17 C18 1.342(14) . ?
 C17 C22 1.389(13) . ?
 C17A C18A 1.3900 . ?
 C17A C22A 1.3900 . ?
 C18A H18A 0.9500 . ?
 C18A C19A 1.3900 . ?
 C19A H19A 0.9500 . ?
 C19A C20A 1.3900 . ?
 C20A H20A 0.9500 . ?
 C20A C21A 1.3900 . ?
 C21A H21A 0.9500 . ?
 C21A C22A 1.3900 . ?
 C22A H22A 0.9500 . ?
 C18 H18 0.9500 . ?
 C18 C19 1.405(18) . ?
 C19 H19 0.9500 . ?
 C19 C20 1.375(19) . ?
 C20 H20 0.9500 . ?
 C20 C21 1.37(2) . ?
 C21 H21 0.9500 . ?
 C21 C22 1.396(15) . ?
 C22 H22 0.9500 . ?
 C23 C24 1.388(11) . ?
 C23 C28 1.403(10) . ?
 C23 P1 1.826(7) . ?
 C24 H24 0.9500 . ?
 C24 C25 1.391(10) . ?
 C25 H25 0.9500 . ?
 C25 C26 1.330(13) . ?
 C26 H26 0.9500 . ?
 C26 C27 1.386(14) . ?
 C27 H27 0.9500 . ?
 C27 C28 1.417(11) . ?
 C28 H28 0.9500 . ?
 C29 C30 1.408(9) . ?
 C29 C34 1.383(8) . ?
 C29 P1 1.824(5) . ?
 C30 H30 0.9500 . ?
 C30 C31 1.399(9) . ?
 C31 H31 0.9500 . ?
 C31 C32 1.375(9) . ?
 C32 H32 0.9500 . ?
 C32 C33 1.379(10) . ?
 C33 H33 0.9500 . ?
 C33 C34 1.392(8) . ?
 C34 H34 0.9500 . ?
 C35 C36 1.391(10) . ?
 C35 C40 1.365(9) . ?
 C35 P1 1.832(8) . ?
 C36 H36 0.9500 . ?
 C36 C37 1.392(11) . ?
 C37 H37 0.9500 . ?
 C37 C38 1.384(10) . ?
 C38 H38 0.9500 . ?
 C38 C39 1.351(10) . ?
 C39 H39 0.9500 . ?
 C39 C40 1.395(9) . ?
 C40 H40 0.9500 . ?
 C41 C42 1.406(8) . ?
 C41 C46 1.388(8) . ?
 C41 P2 1.823(6) . ?
 C42 H42 0.9500 . ?
 C42 C43 1.394(9) . ?
 C43 H43 0.9500 . ?
 C43 C44 1.389(9) . ?
 C44 H44 0.9500 . ?
 C44 C45 1.382(10) . ?
 C45 H45 0.9500 . ?
 C45 C46 1.388(8) . ?
 C46 H46 0.9500 . ?
 C47 C48 1.422(8) . ?
 C47 C52 1.383(8) . ?
 C47 P2 1.817(6) . ?
 C48 H48 0.9500 . ?
 C48 C49 1.378(8) . ?
 C49 H49 0.9500 . ?
 C49 C50 1.389(9) . ?
 C50 H50 0.9500 . ?
 C50 C51 1.374(9) . ?
 C51 H51 0.9500 . ?
 C51 C52 1.402(9) . ?
 C52 H52 0.9500 . ?
 C53 C54 1.402(7) . ?
 C53 C58 1.398(7) . ?
 C53 P2 1.821(5) . ?
 C54 H54 0.9500 . ?
 C54 C55 1.390(7) . ?
 C55 H55 0.9500 . ?
 C55 C56 1.381(9) . ?
 C56 H56 0.9500 . ?
 C56 C57 1.377(7) . ?
 C57 H57 0.9500 . ?
 C57 C58 1.390(7) . ?
 C58 H58 0.9500 . ?
 O1 Ru1 2.258(5) . ?
 O2 Ru1 2.190(5) . ?
 O3 Ru1 2.057(7) . ?
 O3A Ru1 1.95(2) . ?
 P1 Ru1 2.3882(14) . ?
 P2 Ru1 2.3830(14) . ?

loop_
  _geom_angle_atom_site_label_1
  _geom_angle_atom_site_label_2
  _geom_angle_atom_site_label_3
  _geom_angle
  _geom_angle_site_symmetry_1
  _geom_angle_site_symmetry_3
  _geom_angle_publ_flag
 C2 C1 Ru1 177.8(4) . . ?
 O1 C1 C2 119.9(6) . . ?
 O1 C1 Ru1 62.2(4) . . ?
 O2 C1 C2 119.0(6) . . ?
 O2 C1 O1 121.2(8) . . ?
 O2 C1 Ru1 59.0(4) . . ?
 C3 C2 C1 123.3(6) . . ?
 C7 C2 C1 118.1(6) . . ?
 C7 C2 C3 118.6(7) . . ?
 C2 C3 H3 120.4 . . ?
 C4 C3 C2 119.1(7) . . ?
 C4 C3 H3 120.4 . . ?
 C3 C4 C5 123.2(7) . . ?
 F1 C4 C3 121.0(8) . . ?
 F1 C4 C5 115.7(8) . . ?
 C4 C5 H5 121.7 . . ?
 C6 C5 C4 116.6(7) . . ?
 C6 C5 H5 121.7 . . ?
 C5 C6 H6 118.7 . . ?
 C5 C6 C7 122.6(7) . . ?
 C7 C6 H6 118.7 . . ?
 C2 C7 H7 120.1 . . ?
 C6 C7 C2 119.7(7) . . ?
 C6 C7 H7 120.1 . . ?
 O3 C8 C9 113.7(11) . . ?
 O3 C8 O4 129.3(13) . . ?
 O4 C8 C9 116.9(12) . . ?
 O3A C8A C9A 114(3) . . ?
 O3A C8A O4A 130(4) . . ?
 O4A C8A C9A 113(3) . . ?
 C10 C9 C8 121.2(10) . . ?
 C10 C9 C14 120.7(10) . . ?
 C14 C9 C8 117.4(11) . . ?
 C10A C9A C8A 123(2) . . ?
 C10A C9A C14A 120.0 . . ?
 C14A C9A C8A 117(2) . . ?
 C9A C10A H10A 120.0 . . ?
 C9A C10A C11A 120.0 . . ?
 C11A C10A H10A 120.0 . . ?
 C10A C11A H11A 120.0 . . ?
 C10A C11A C12A 120.0 . . ?
 C12A C11A H11A 120.0 . . ?
 C11A C12A H12A 120.0 . . ?
 C11A C12A C13A 120.0 . . ?
 C13A C12A H12A 120.0 . . ?
 C14A C13A C12A 120.0 . . ?
 F2A C13A C12A 115(2) . . ?
 F2A C13A C14A 125(2) . . ?
 C9A C14A H14A 120.0 . . ?
 C13A C14A C9A 120.0 . . ?
 C13A C14A H14A 120.0 . . ?
 C9 C10 H10 120.9 . . ?
 C11 C10 C9 118.3(10) . . ?
 C11 C10 H10 120.9 . . ?
 C10 C11 F2 114.0(12) . . ?
 C12 C11 C10 125.1(11) . . ?
 C12 C11 F2 120.7(14) . . ?
 C11 C12 H12 120.8 . . ?
 C11 C12 C13 118.3(11) . . ?
 C13 C12 H12 120.8 . . ?
 C12 C13 H13 120.8 . . ?
 C12 C13 C14 118.5(8) . . ?
 C14 C13 H13 120.8 . . ?
 C9 C14 C13 119.0(10) . . ?
 C9 C14 H14 120.5 . . ?
 C13 C14 H14 120.5 . . ?
 C16 C15 Ru1 177.3(9) . . ?
 C16A C15A Ru1 164(3) . . ?
 C15 C16 H16 116.3 . . ?
 C15 C16 C17 127.5(13) . . ?
 C17 C16 H16 116.3 . . ?
 C15A C16A H16A 109.4 . . ?
 C15A C16A C17A 141(4) . . ?
 C17A C16A H16A 109.4 . . ?
 C18 C17 C16 122.2(12) . . ?
 C18 C17 C22 118.0(12) . . ?
 C22 C17 C16 119.7(12) . . ?
 C16A C17A C18A 119.6(10) . . ?
 C16A C17A C22A 119.2(10) . . ?
 C18A C17A C22A 120.0 . . ?
 C17A C18A H18A 120.0 . . ?
 C17A C18A C19A 120.0 . . ?
 C19A C18A H18A 120.0 . . ?
 C18A C19A H19A 120.0 . . ?
 C18A C19A C20A 120.0 . . ?
 C20A C19A H19A 120.0 . . ?
 C19A C20A H20A 120.0 . . ?
 C19A C20A C21A 120.0 . . ?
 C21A C20A H20A 120.0 . . ?
 C20A C21A H21A 120.0 . . ?
 C22A C21A C20A 120.0 . . ?
 C22A C21A H21A 120.0 . . ?
 C17A C22A H22A 120.0 . . ?
 C21A C22A C17A 120.0 . . ?
 C21A C22A H22A 120.0 . . ?
 C17 C18 H18 118.5 . . ?
 C17 C18 C19 123.0(13) . . ?
 C19 C18 H18 118.5 . . ?
 C18 C19 H19 121.1 . . ?
 C20 C19 C18 117.9(13) . . ?
 C20 C19 H19 121.1 . . ?
 C19 C20 H20 119.6 . . ?
 C21 C20 C19 120.9(11) . . ?
 C21 C20 H20 119.6 . . ?
 C20 C21 H21 120.3 . . ?
 C20 C21 C22 119.4(10) . . ?
 C22 C21 H21 120.3 . . ?
 C17 C22 C21 120.8(11) . . ?
 C17 C22 H22 119.6 . . ?
 C21 C22 H22 119.6 . . ?
 C24 C23 C28 118.2(7) . . ?
 C24 C23 P1 119.3(6) . . ?
 C28 C23 P1 122.5(7) . . ?
 C23 C24 H24 120.0 . . ?
 C23 C24 C25 120.0(8) . . ?
 C25 C24 H24 120.0 . . ?
 C24 C25 H25 119.1 . . ?
 C26 C25 C24 121.7(9) . . ?
 C26 C25 H25 119.1 . . ?
 C25 C26 H26 119.4 . . ?
 C25 C26 C27 121.2(9) . . ?
 C27 C26 H26 119.4 . . ?
 C26 C27 H27 120.9 . . ?
 C26 C27 C28 118.1(9) . . ?
 C28 C27 H27 120.9 . . ?
 C23 C28 C27 120.6(9) . . ?
 C23 C28 H28 119.7 . . ?
 C27 C28 H28 119.7 . . ?
 C30 C29 P1 121.4(4) . . ?
 C34 C29 C30 118.0(5) . . ?
 C34 C29 P1 120.6(5) . . ?
 C29 C30 H30 119.8 . . ?
 C31 C30 C29 120.4(7) . . ?
 C31 C30 H30 119.8 . . ?
 C30 C31 H31 120.1 . . ?
 C32 C31 C30 119.9(7) . . ?
 C32 C31 H31 120.1 . . ?
 C31 C32 H32 119.8 . . ?
 C31 C32 C33 120.4(6) . . ?
 C33 C32 H32 119.8 . . ?
 C32 C33 H33 120.1 . . ?
 C32 C33 C34 119.8(6) . . ?
 C34 C33 H33 120.1 . . ?
 C29 C34 C33 121.3(6) . . ?
 C29 C34 H34 119.4 . . ?
 C33 C34 H34 119.4 . . ?
 C36 C35 P1 120.5(6) . . ?
 C40 C35 C36 121.1(7) . . ?
 C40 C35 P1 118.2(5) . . ?
 C35 C36 H36 120.6 . . ?
 C35 C36 C37 118.7(7) . . ?
 C37 C36 H36 120.6 . . ?
 C36 C37 H37 120.0 . . ?
 C38 C37 C36 119.9(7) . . ?
 C38 C37 H37 120.0 . . ?
 C37 C38 H38 119.8 . . ?
 C39 C38 C37 120.3(8) . . ?
 C39 C38 H38 119.8 . . ?
 C38 C39 H39 119.6 . . ?
 C38 C39 C40 120.8(7) . . ?
 C40 C39 H39 119.6 . . ?
 C35 C40 C39 119.1(7) . . ?
 C35 C40 H40 120.5 . . ?
 C39 C40 H40 120.5 . . ?
 C42 C41 P2 117.4(5) . . ?
 C46 C41 C42 120.1(6) . . ?
 C46 C41 P2 122.4(5) . . ?
 C41 C42 H42 120.5 . . ?
 C43 C42 C41 119.0(6) . . ?
 C43 C42 H42 120.5 . . ?
 C42 C43 H43 119.8 . . ?
 C44 C43 C42 120.4(7) . . ?
 C44 C43 H43 119.8 . . ?
 C43 C44 H44 119.9 . . ?
 C45 C44 C43 120.2(6) . . ?
 C45 C44 H44 119.9 . . ?
 C44 C45 H45 119.9 . . ?
 C44 C45 C46 120.2(7) . . ?
 C46 C45 H45 119.9 . . ?
 C41 C46 C45 120.0(7) . . ?
 C41 C46 H46 120.0 . . ?
 C45 C46 H46 120.0 . . ?
 C48 C47 P2 117.7(5) . . ?
 C52 C47 C48 118.6(6) . . ?
 C52 C47 P2 123.5(5) . . ?
 C47 C48 H48 120.5 . . ?
 C49 C48 C47 119.1(6) . . ?
 C49 C48 H48 120.5 . . ?
 C48 C49 H49 118.8 . . ?
 C48 C49 C50 122.4(6) . . ?
 C50 C49 H49 118.8 . . ?
 C49 C50 H50 120.9 . . ?
 C51 C50 C49 118.2(6) . . ?
 C51 C50 H50 120.9 . . ?
 C50 C51 H51 119.5 . . ?
 C50 C51 C52 121.0(6) . . ?
 C52 C51 H51 119.5 . . ?
 C47 C52 C51 120.6(6) . . ?
 C47 C52 H52 119.7 . . ?
 C51 C52 H52 119.7 . . ?
 C54 C53 P2 120.6(4) . . ?
 C58 C53 C54 117.5(4) . . ?
 C58 C53 P2 121.9(4) . . ?
 C53 C54 H54 119.6 . . ?
 C55 C54 C53 120.7(5) . . ?
 C55 C54 H54 119.6 . . ?
 C54 C55 H55 119.8 . . ?
 C56 C55 C54 120.4(5) . . ?
 C56 C55 H55 119.8 . . ?
 C55 C56 H56 119.9 . . ?
 C57 C56 C55 120.1(5) . . ?
 C57 C56 H56 119.9 . . ?
 C56 C57 H57 120.2 . . ?
 C56 C57 C58 119.6(5) . . ?
 C58 C57 H57 120.2 . . ?
 C53 C58 H58 119.2 . . ?
 C57 C58 C53 121.7(5) . . ?
 C57 C58 H58 119.2 . . ?
 C1 O1 Ru1 88.5(4) . . ?
 C1 O2 Ru1 91.9(5) . . ?
 C8 O3 Ru1 116.6(9) . . ?
 C8A O3A Ru1 121(3) . . ?
 C23 P1 C35 103.3(3) . . ?
 C23 P1 Ru1 116.7(3) . . ?
 C29 P1 C23 103.1(3) . . ?
 C29 P1 C35 104.5(3) . . ?
 C29 P1 Ru1 115.61(17) . . ?
 C35 P1 Ru1 112.1(2) . . ?
 C41 P2 Ru1 116.0(2) . . ?
 C47 P2 C41 103.3(3) . . ?
 C47 P2 C53 103.9(3) . . ?
 C47 P2 Ru1 112.4(2) . . ?
 C53 P2 C41 104.3(3) . . ?
 C53 P2 Ru1 115.46(17) . . ?
 C15 Ru1 C1 121.0(3) . . ?
 C15 Ru1 C15A 125.9(10) . . ?
 C15 Ru1 O1 149.6(3) . . ?
 C15 Ru1 O2 92.4(3) . . ?
 C15 Ru1 O3 96.8(4) . . ?
 C15 Ru1 O3A 26.4(7) . . ?
 C15 Ru1 P1 90.6(3) . . ?
 C15 Ru1 P2 89.8(3) . . ?
 C15A Ru1 C1 113.0(10) . . ?
 C15A Ru1 O1 84.4(10) . . ?
 C15A Ru1 O2 140.7(10) . . ?
 C15A Ru1 O3 30.9(9) . . ?
 C15A Ru1 O3A 100.2(12) . . ?
 C15A Ru1 P1 86.0(9) . . ?
 C15A Ru1 P2 96.0(9) . . ?
 O1 Ru1 C1 29.28(17) . . ?
 O1 Ru1 P1 94.27(14) . . ?
 O1 Ru1 P2 84.01(13) . . ?
 O2 Ru1 C1 29.03(17) . . ?
 O2 Ru1 O1 58.30(19) . . ?
 O2 Ru1 P1 85.03(13) . . ?
 O2 Ru1 P2 92.27(12) . . ?
 O3 Ru1 C1 141.7(3) . . ?
 O3 Ru1 O1 112.4(2) . . ?
 O3 Ru1 O2 170.7(3) . . ?
 O3 Ru1 P1 96.5(2) . . ?
 O3 Ru1 P2 86.15(19) . . ?
 O3A Ru1 C1 145.3(7) . . ?
 O3A Ru1 O1 174.0(7) . . ?
 O3A Ru1 O2 116.3(7) . . ?
 O3A Ru1 O3 73.0(8) . . ?
 O3A Ru1 P1 82.2(6) . . ?
 O3A Ru1 P2 99.3(6) . . ?
 P1 Ru1 C1 90.18(14) . . ?
 P2 Ru1 C1 87.29(14) . . ?
 P2 Ru1 P1 177.28(8) . . ?

loop_
  _geom_torsion_atom_site_label_1
  _geom_torsion_atom_site_label_2
  _geom_torsion_atom_site_label_3
  _geom_torsion_atom_site_label_4
  _geom_torsion
  _geom_torsion_site_symmetry_1
  _geom_torsion_site_symmetry_2
  _geom_torsion_site_symmetry_3
  _geom_torsion_site_symmetry_4
  _geom_torsion_publ_flag
 C1 C2 C3 C4 -179.9(7) . . . . ?
 C1 C2 C7 C6 -179.6(6) . . . . ?
 C1 O1 Ru1 C15 -15.8(7) . . . . ?
 C1 O1 Ru1 C15A 168.2(10) . . . . ?
 C1 O1 Ru1 O2 1.3(3) . . . . ?
 C1 O1 Ru1 O3 -178.5(4) . . . . ?
 C1 O1 Ru1 O3A 29(7) . . . . ?
 C1 O1 Ru1 P1 82.7(3) . . . . ?
 C1 O1 Ru1 P2 -95.2(4) . . . . ?
 C1 O2 Ru1 C15 170.2(4) . . . . ?
 C1 O2 Ru1 C15A -22.0(15) . . . . ?
 C1 O2 Ru1 O1 -1.3(3) . . . . ?
 C1 O2 Ru1 O3 0.3(16) . . . . ?
 C1 O2 Ru1 O3A -178.2(8) . . . . ?
 C1 O2 Ru1 P1 -99.4(3) . . . . ?
 C1 O2 Ru1 P2 80.3(3) . . . . ?
 C2 C1 O1 Ru1 179.0(5) . . . . ?
 C2 C1 O2 Ru1 -178.9(5) . . . . ?
 C2 C1 Ru1 C15 13(11) . . . . ?
 C2 C1 Ru1 C15A -170(11) . . . . ?
 C2 C1 Ru1 O1 -157(11) . . . . ?
 C2 C1 Ru1 O2 25(11) . . . . ?
 C2 C1 Ru1 O3 -155(11) . . . . ?
 C2 C1 Ru1 O3A 28(11) . . . . ?
 C2 C1 Ru1 P1 104(11) . . . . ?
 C2 C1 Ru1 P2 -75(11) . . . . ?
 C2 C3 C4 C5 -0.2(12) . . . . ?
 C2 C3 C4 F1 -177.9(7) . . . . ?
 C3 C2 C7 C6 -0.9(9) . . . . ?
 C3 C4 C5 C6 -1.6(12) . . . . ?
 C4 C5 C6 C7 2.3(11) . . . . ?
 C5 C6 C7 C2 -1.0(11) . . . . ?
 C7 C2 C3 C4 1.5(10) . . . . ?
 C8 C9 C10 C11 172.7(16) . . . . ?
 C8 C9 C14 C13 -172.4(17) . . . . ?
 C8 O3 Ru1 C1 -36.6(10) . . . . ?
 C8 O3 Ru1 C15 153.3(8) . . . . ?
 C8 O3 Ru1 C15A -8.9(19) . . . . ?
 C8 O3 Ru1 O1 -35.4(9) . . . . ?
 C8 O3 Ru1 O2 -36.8(19) . . . . ?
 C8 O3 Ru1 O3A 141.7(11) . . . . ?
 C8 O3 Ru1 P1 62.0(8) . . . . ?
 C8 O3 Ru1 P2 -117.3(8) . . . . ?
 C8A C9A C10A C11A 173(4) . . . . ?
 C8A C9A C14A C13A -173(4) . . . . ?
 C8A O3A Ru1 C1 -29(3) . . . . ?
 C8A O3A Ru1 C15 0(2) . . . . ?
 C8A O3A Ru1 C15A 168(3) . . . . ?
 C8A O3A Ru1 O1 -53(8) . . . . ?
 C8A O3A Ru1 O2 -27(3) . . . . ?
 C8A O3A Ru1 O3 153(3) . . . . ?
 C8A O3A Ru1 P1 -108(3) . . . . ?
 C8A O3A Ru1 P2 70(3) . . . . ?
 C9 C8 O3 Ru1 -170.6(10) . . . . ?
 C9 C10 C11 C12 -4.2(16) . . . . ?
 C9 C10 C11 F2 -178.8(12) . . . . ?
 C9A C8A O3A Ru1 -173(2) . . . . ?
 C9A C10A C11A C12A 0.0 . . . . ?
 C10A C9A C14A C13A 0.0 . . . . ?
 C10A C11A C12A C13A 0.0 . . . . ?
 C11A C12A C13A C14A 0.0 . . . . ?
 C11A C12A C13A F2A -177(3) . . . . ?
 C12A C13A C14A C9A 0.0 . . . . ?
 C14A C9A C10A C11A 0.0 . . . . ?
 C10 C9 C14 C13 -1.8(16) . . . . ?
 C10 C11 C12 C13 4.8(17) . . . . ?
 C11 C12 C13 C14 -3.8(18) . . . . ?
 C12 C13 C14 C9 2.4(18) . . . . ?
 C14 C9 C10 C11 2.5(15) . . . . ?
 C15 C16 C17 C18 14(2) . . . . ?
 C15 C16 C17 C22 -168.5(12) . . . . ?
 C15A C16A C17A C18A 149(4) . . . . ?
 C15A C16A C17A C22A -43(8) . . . . ?
 C16 C15 Ru1 C1 12(17) . . . . ?
 C16 C15 Ru1 C15A -164(16) . . . . ?
 C16 C15 Ru1 O1 21(17) . . . . ?
 C16 C15 Ru1 O2 6(17) . . . . ?
 C16 C15 Ru1 O3 -175(100) . . . . ?
 C16 C15 Ru1 O3A -150(17) . . . . ?
 C16 C15 Ru1 P1 -79(17) . . . . ?
 C16 C15 Ru1 P2 99(17) . . . . ?
 C16 C17 C18 C19 179.0(14) . . . . ?
 C16 C17 C22 C21 -178.7(14) . . . . ?
 C16A C15A Ru1 C1 158(11) . . . . ?
 C16A C15A Ru1 C15 -26(12) . . . . ?
 C16A C15A Ru1 O1 152(11) . . . . ?
 C16A C15A Ru1 O2 169(10) . . . . ?
 C16A C15A Ru1 O3 -4(10) . . . . ?
 C16A C15A Ru1 O3A -32(11) . . . . ?
 C16A C15A Ru1 P1 -114(11) . . . . ?
 C16A C15A Ru1 P2 68(11) . . . . ?
 C16A C17A C18A C19A 167(5) . . . . ?
 C16A C17A C22A C21A -167(5) . . . . ?
 C17 C18 C19 C20 0(2) . . . . ?
 C17A C18A C19A C20A 0.0 . . . . ?
 C18A C17A C22A C21A 0.0 . . . . ?
 C18A C19A C20A C21A 0.0 . . . . ?
 C19A C20A C21A C22A 0.0 . . . . ?
 C20A C21A C22A C17A 0.0 . . . . ?
 C22A C17A C18A C19A 0.0 . . . . ?
 C18 C17 C22 C21 -1(2) . . . . ?
 C18 C19 C20 C21 -1.7(19) . . . . ?
 C19 C20 C21 C22 2(2) . . . . ?
 C20 C21 C22 C17 -1(2) . . . . ?
 C22 C17 C18 C19 1.8(19) . . . . ?
 C23 C24 C25 C26 0.4(11) . . . . ?
 C23 P1 Ru1 C1 145.6(3) . . . . ?
 C23 P1 Ru1 C15 -93.4(4) . . . . ?
 C23 P1 Ru1 C15A 32.5(10) . . . . ?
 C23 P1 Ru1 O1 116.6(3) . . . . ?
 C23 P1 Ru1 O2 174.2(3) . . . . ?
 C23 P1 Ru1 O3 3.5(4) . . . . ?
 C23 P1 Ru1 O3A -68.3(8) . . . . ?
 C23 P1 Ru1 P2 167.3(11) . . . . ?
 C24 C23 C28 C27 4.0(10) . . . . ?
 C24 C23 P1 C29 -86.2(6) . . . . ?
 C24 C23 P1 C35 165.2(6) . . . . ?
 C24 C23 P1 Ru1 41.7(6) . . . . ?
 C24 C25 C26 C27 -0.6(13) . . . . ?
 C25 C26 C27 C28 2.4(13) . . . . ?
 C26 C27 C28 C23 -4.1(12) . . . . ?
 C28 C23 C24 C25 -2.1(10) . . . . ?
 C28 C23 P1 C29 93.3(6) . . . . ?
 C28 C23 P1 C35 -15.4(6) . . . . ?
 C28 C23 P1 Ru1 -138.9(5) . . . . ?
 C29 C30 C31 C32 -3.6(13) . . . . ?
 C29 P1 Ru1 C1 -92.9(3) . . . . ?
 C29 P1 Ru1 C15 28.1(4) . . . . ?
 C29 P1 Ru1 C15A 154.1(10) . . . . ?
 C29 P1 Ru1 O1 -121.9(3) . . . . ?
 C29 P1 Ru1 O2 -64.3(3) . . . . ?
 C29 P1 Ru1 O3 125.0(4) . . . . ?
 C29 P1 Ru1 O3A 53.2(8) . . . . ?
 C29 P1 Ru1 P2 -71.2(12) . . . . ?
 C30 C29 C34 C33 -4.1(10) . . . . ?
 C30 C29 P1 C23 -15.5(7) . . . . ?
 C30 C29 P1 C35 92.3(6) . . . . ?
 C30 C29 P1 Ru1 -144.0(5) . . . . ?
 C30 C31 C32 C33 -0.3(12) . . . . ?
 C31 C32 C33 C34 2.0(11) . . . . ?
 C32 C33 C34 C29 0.3(11) . . . . ?
 C34 C29 C30 C31 5.7(11) . . . . ?
 C34 C29 P1 C23 161.1(6) . . . . ?
 C34 C29 P1 C35 -91.1(6) . . . . ?
 C34 C29 P1 Ru1 32.6(6) . . . . ?
 C35 C36 C37 C38 -1.5(14) . . . . ?
 C35 P1 Ru1 C1 26.8(3) . . . . ?
 C35 P1 Ru1 C15 147.8(4) . . . . ?
 C35 P1 Ru1 C15A -86.3(10) . . . . ?
 C35 P1 Ru1 O1 -2.2(3) . . . . ?
 C35 P1 Ru1 O2 55.4(3) . . . . ?
 C35 P1 Ru1 O3 -115.4(3) . . . . ?
 C35 P1 Ru1 O3A 172.9(8) . . . . ?
 C35 P1 Ru1 P2 48.5(11) . . . . ?
 C36 C35 C40 C39 1.9(11) . . . . ?
 C36 C35 P1 C23 106.0(7) . . . . ?
 C36 C35 P1 C29 -1.6(7) . . . . ?
 C36 C35 P1 Ru1 -127.5(6) . . . . ?
 C36 C37 C38 C39 1.7(15) . . . . ?
 C37 C38 C39 C40 -0.1(14) . . . . ?
 C38 C39 C40 C35 -1.7(11) . . . . ?
 C40 C35 C36 C37 -0.4(13) . . . . ?
 C40 C35 P1 C23 -68.7(6) . . . . ?
 C40 C35 P1 C29 -176.3(5) . . . . ?
 C40 C35 P1 Ru1 57.8(6) . . . . ?
 C41 C42 C43 C44 -1.6(9) . . . . ?
 C41 P2 Ru1 C1 148.0(2) . . . . ?
 C41 P2 Ru1 C15 27.0(3) . . . . ?
 C41 P2 Ru1 C15A -99.1(10) . . . . ?
 C41 P2 Ru1 O1 177.2(2) . . . . ?
 C41 P2 Ru1 O2 119.4(2) . . . . ?
 C41 P2 Ru1 O3 -69.8(3) . . . . ?
 C41 P2 Ru1 O3A 2.2(8) . . . . ?
 C41 P2 Ru1 P1 126.2(11) . . . . ?
 C42 C41 C46 C45 -1.5(9) . . . . ?
 C42 C41 P2 C47 165.1(4) . . . . ?
 C42 C41 P2 C53 -86.5(5) . . . . ?
 C42 C41 P2 Ru1 41.7(5) . . . . ?
 C42 C43 C44 C45 0.8(10) . . . . ?
 C43 C44 C45 C46 -0.3(10) . . . . ?
 C44 C45 C46 C41 0.7(9) . . . . ?
 C46 C41 C42 C43 1.9(9) . . . . ?
 C46 C41 P2 C47 -18.6(5) . . . . ?
 C46 C41 P2 C53 89.8(5) . . . . ?
 C46 C41 P2 Ru1 -142.0(4) . . . . ?
 C47 C48 C49 C50 3.9(10) . . . . ?
 C47 P2 Ru1 C1 29.4(2) . . . . ?
 C47 P2 Ru1 C15 -91.6(3) . . . . ?
 C47 P2 Ru1 C15A 142.3(10) . . . . ?
 C47 P2 Ru1 O1 58.6(2) . . . . ?
 C47 P2 Ru1 O2 0.8(2) . . . . ?
 C47 P2 Ru1 O3 171.6(3) . . . . ?
 C47 P2 Ru1 O3A -116.3(8) . . . . ?
 C47 P2 Ru1 P1 7.7(11) . . . . ?
 C48 C47 C52 C51 1.1(9) . . . . ?
 C48 C47 P2 C41 -65.0(5) . . . . ?
 C48 C47 P2 C53 -173.7(5) . . . . ?
 C48 C47 P2 Ru1 60.8(5) . . . . ?
 C48 C49 C50 C51 -1.4(11) . . . . ?
 C49 C50 C51 C52 -1.4(11) . . . . ?
 C50 C51 C52 C47 1.5(11) . . . . ?
 C52 C47 C48 C49 -3.7(9) . . . . ?
 C52 C47 P2 C41 119.8(5) . . . . ?
 C52 C47 P2 C53 11.1(6) . . . . ?
 C52 C47 P2 Ru1 -114.4(5) . . . . ?
 C53 C54 C55 C56 1.1(10) . . . . ?
 C53 P2 Ru1 C1 -89.5(2) . . . . ?
 C53 P2 Ru1 C15 149.5(4) . . . . ?
 C53 P2 Ru1 C15A 23.4(10) . . . . ?
 C53 P2 Ru1 O1 -60.3(2) . . . . ?
 C53 P2 Ru1 O2 -118.1(2) . . . . ?
 C53 P2 Ru1 O3 52.7(3) . . . . ?
 C53 P2 Ru1 O3A 124.7(8) . . . . ?
 C53 P2 Ru1 P1 -111.2(11) . . . . ?
 C54 C53 C58 C57 -1.9(10) . . . . ?
 C54 C53 P2 C41 157.0(5) . . . . ?
 C54 C53 P2 C47 -95.1(5) . . . . ?
 C54 C53 P2 Ru1 28.4(5) . . . . ?
 C54 C55 C56 C57 -0.8(10) . . . . ?
 C55 C56 C57 C58 -0.9(11) . . . . ?
 C56 C57 C58 C53 2.3(11) . . . . ?
 C58 C53 C54 C55 0.2(9) . . . . ?
 C58 C53 P2 C41 -26.0(6) . . . . ?
 C58 C53 P2 C47 81.9(6) . . . . ?
 C58 C53 P2 Ru1 -154.5(5) . . . . ?
 F1 C4 C5 C6 176.2(8) . . . . ?
 F2 C11 C12 C13 179.2(12) . . . . ?
 F2A C13A C14A C9A 177(3) . . . . ?
 O1 C1 C2 C3 162.0(6) . . . . ?
 O1 C1 C2 C7 -19.4(8) . . . . ?
 O1 C1 O2 Ru1 2.3(6) . . . . ?
 O1 C1 Ru1 C15 170.7(4) . . . . ?
 O1 C1 Ru1 C15A -12.7(11) . . . . ?
 O1 C1 Ru1 O2 -177.8(6) . . . . ?
 O1 C1 Ru1 O3 2.3(6) . . . . ?
 O1 C1 Ru1 O3A -174.9(12) . . . . ?
 O1 C1 Ru1 P1 -98.4(3) . . . . ?
 O1 C1 Ru1 P2 82.6(3) . . . . ?
 O2 C1 C2 C3 -16.8(9) . . . . ?
 O2 C1 C2 C7 161.8(6) . . . . ?
 O2 C1 O1 Ru1 -2.2(6) . . . . ?
 O2 C1 Ru1 C15 -11.5(5) . . . . ?
 O2 C1 Ru1 C15A 165.1(10) . . . . ?
 O2 C1 Ru1 O1 177.8(6) . . . . ?
 O2 C1 Ru1 O3 -179.9(4) . . . . ?
 O2 C1 Ru1 O3A 2.9(13) . . . . ?
 O2 C1 Ru1 P1 79.4(3) . . . . ?
 O2 C1 Ru1 P2 -99.6(3) . . . . ?
 O3 C8 C9 C10 3(2) . . . . ?
 O3 C8 C9 C14 173.2(10) . . . . ?
 O3A C8A C9A C10A -175(3) . . . . ?
 O3A C8A C9A C14A -2(4) . . . . ?
 O4 C8 C9 C10 178.5(12) . . . . ?
 O4 C8 C9 C14 -10.9(18) . . . . ?
 O4 C8 O3 Ru1 14.1(17) . . . . ?
 O4A C8A C9A C10A 20(4) . . . . ?
 O4A C8A C9A C14A -167(2) . . . . ?
 O4A C8A O3A Ru1 -11(6) . . . . ?
 P1 C23 C24 C25 177.3(5) . . . . ?
 P1 C23 C28 C27 -175.5(6) . . . . ?
 P1 C29 C30 C31 -177.6(6) . . . . ?
 P1 C29 C34 C33 179.2(5) . . . . ?
 P1 C35 C36 C37 -174.9(7) . . . . ?
 P1 C35 C40 C39 176.6(5) . . . . ?
 P2 C41 C42 C43 178.3(5) . . . . ?
 P2 C41 C46 C45 -177.7(4) . . . . ?
 P2 C47 C48 C49 -179.2(5) . . . . ?
 P2 C47 C52 C51 176.3(5) . . . . ?
 P2 C53 C54 C55 177.4(5) . . . . ?
 P2 C53 C58 C57 -179.1(6) . . . . ?
 Ru1 C1 C2 C3 -41(12) . . . . ?
 Ru1 C1 C2 C7 137(11) . . . . ?
 Ru1 C15 C16 C17 157(16) . . . . ?
 Ru1 C15A C16A C17A 44(15) . . . . ?

loop_
  _exptl_crystal_face_index_h
  _exptl_crystal_face_index_k
  _exptl_crystal_face_index_l
  _exptl_crystal_face_perp_dist
  _exptl_oxdiff_crystal_face_indexfrac_h
  _exptl_oxdiff_crystal_face_indexfrac_k
  _exptl_oxdiff_crystal_face_indexfrac_l
  _exptl_oxdiff_crystal_face_x
  _exptl_oxdiff_crystal_face_y
  _exptl_oxdiff_crystal_face_z
 -2 -23 -1 0.0464 -1.9987 -22.9973 -0.9989 0.9694 -0.1327 -0.1271
 1 23 -3 0.0586 0.9987 22.9971 -3.0011 -0.9343 0.1278 0.3128
 3 23 4 0.0607 2.9988 22.9974 3.9990 -0.9979 0.1272 -0.0139
 -2 17 -15 0.0892 -2.0011 16.9973 -15.0009 -0.5825 0.0620 0.8211
 -5 -16 -15 0.0837 -4.9993 -15.9987 -14.9994 0.8001 -0.1086 0.5757
 5 16 15 0.0869 4.9993 15.9987 14.9994 -0.8001 0.1086 -0.5757
 2 -18 14 0.0840 2.0012 -17.9972 14.0010 0.6301 -0.0809 -0.7846
 26 -2 -2 0.0679 26.0018 -1.9974 -1.9983 -0.1392 -0.9908 -0.1145
 -26 2 1 0.0682 -26.0018 1.9974 0.9983 0.1457 0.9804 0.1591
 18 1 -15 0.0850 18.0011 1.0012 -14.9988 -0.1056 -0.8071 0.5474
 -17 5 -16 0.0942 -17.0014 4.9975 -16.0012 0.0521 0.4994 0.8768
 -21 0 13 0.0880 -21.0014 -0.0016 12.9986 0.1046 0.9048 -0.4284
 20 -4 13 0.0789 20.0015 -3.9974 13.0014 -0.1007 -0.6320 -0.7566
 -24 1 9 0.0772 -24.0016 0.9979 8.9984 0.1166 0.9817 -0.2202
 -4 -4 21 0.1166 -4.0001 -3.9994 20.9998 0.0635 0.3308 -0.9403
 -18 -10 -12 0.0829 -18.0006 -10.0006 -12.0005 0.6513 0.4500 0.5842
 -11 -15 14 0.0871 -10.9998 -14.9988 14.0000 0.6241 0.4211 -0.6666
 -19 -16 -1 0.0706 -19.0003 -15.9997 -1.0003 0.8351 0.5500 0.0522
 10 14 -15 0.0858 9.9998 13.9988 -15.0000 -0.5675 -0.4033 0.7103
 19 11 11 0.0768 19.0006 11.0006 11.0005 -0.6948 -0.4886 -0.5387
 13 16 -12 0.0723 12.9999 15.9989 -12.0000 -0.6962 -0.4651 0.5710
 -19 15 6 0.0738 -19.0022 14.9965 5.9980 -0.4840 0.8863 -0.0092
 -15 12 -14 0.0900 -15.0017 11.9968 -14.0015 -0.2665 0.5064 0.8299
 -20 15 1 0.0743 -20.0022 14.9963 0.9980 -0.4424 0.8710 0.2211
 14 -13 -14 0.0786 14.0017 -12.9974 -13.9984 0.4991 -0.7691 0.4183
#end
